# Supplementary material
Source: publisher figshare collection journal article supplement (https://acs.figshare.com/ndownloader/files/4134556)
Supplement: Supplementary file 1 [file 4134556]

data_(1b)-jun1910
 
_audit_creation_date            2010-06-30T07:36:54-00:00
_audit_creation_method         'WinGX routine CIF_UPDATE'
_audit_conform_dict_name        cif_core.dic
_audit_conform_dict_version     2.2
_audit_conform_dict_location    ftp://ftp.iucr.org/pub/cif_core.dic
_publ_requested_category        FM
 
#----------------------------------------------------------------------------#
#                   CHEMICAL INFORMATION                                     #
#----------------------------------------------------------------------------#
 
_chemical_name_systematic
;
 ?
;
_chemical_formula_moiety                'C41 H63 Ge N2 P'
_chemical_formula_sum                   'C41 H63 Ge N2 P'
_chemical_formula_weight                687.49
_chemical_compound_source               'synthesis as described'
 
#----------------------------------------------------------------------------#
#                   UNIT CELL INFORMATION                                    #
#----------------------------------------------------------------------------#
 
_symmetry_cell_setting                  monoclinic
_symmetry_space_group_name_H-M          'P 21/c'
_symmetry_space_group_name_Hall         '-P 2ybc'
_symmetry_Int_Tables_number             14
loop_
    _symmetry_equiv_pos_as_xyz
'x, y, z'
'-x, y+1/2, -z+1/2'
'-x, -y, -z'
'x, -y-1/2, z-1/2'
 
_cell_length_a                          10.0941(2)
_cell_length_b                          23.5171(5)
_cell_length_c                          17.2689(3)
_cell_angle_alpha                       90
_cell_angle_beta                        110.600(1)
_cell_angle_gamma                       90
_cell_volume                            3837.24(13)
_cell_formula_units_Z                   4
_cell_measurement_temperature           173(2)
_cell_measurement_reflns_used           48360
_cell_measurement_theta_min             3.395
_cell_measurement_theta_max             26.733
_cell_measurement_wavelength            0.71073
 
#----------------------------------------------------------------------------#
#                   CRYSTAL INFORMATION                                      #
#----------------------------------------------------------------------------#
 
_exptl_crystal_description              Rhombohedral
_exptl_crystal_colour                   Purple
_exptl_crystal_size_max                 0.21
_exptl_crystal_size_mid                 0.09
_exptl_crystal_size_min                 0.06
_exptl_crystal_density_diffrn           1.19
_exptl_crystal_density_method           'not measured'
_exptl_crystal_F_000                    1480
_exptl_special_details
;
 ?
;
 
#----------------------------------------------------------------------------#
#                   ABSORPTION CORRECTION                                    #
#----------------------------------------------------------------------------#
 
_exptl_absorpt_coefficient_mu           0.869
_exptl_absorpt_correction_type          multi-scan
_exptl_absorpt_process_details
;
        [c.f. r.h. blessing, acta cryst. (1995), a51, 33-38]
;
_exptl_absorpt_correction_T_min         0.8301
_exptl_absorpt_correction_T_max         0.9472
 
#----------------------------------------------------------------------------#
#                   DATA COLLECTION                                          #
#----------------------------------------------------------------------------#
 
_diffrn_source                          'Enraf Nonius FR590'
_diffrn_ambient_temperature             173(2)
_diffrn_radiation_wavelength            0.71073
_diffrn_radiation_type                  MoK\a
_diffrn_radiation_monochromator         graphite
_diffrn_radiation_probe                 x-ray
_diffrn_detector                        'CCD plate'
_diffrn_orient_matrix_type              'by Nonius Collect from scalepack cell'
_diffrn_orient_matrix_ub_11             0.860811E-1
_diffrn_orient_matrix_ub_12             0.164919E-1
_diffrn_orient_matrix_ub_13             -0.97595E-2
_diffrn_orient_matrix_ub_21             0.10802E-2
_diffrn_orient_matrix_ub_22             -0.299447E-1
_diffrn_orient_matrix_ub_23             -0.424624E-1
_diffrn_orient_matrix_ub_31             -0.548605E-1
_diffrn_orient_matrix_ub_32             0.252877E-1
_diffrn_orient_matrix_ub_33             -0.439175E-1
_diffrn_measurement_device              '95mm CCD camera on \k-goniostat'
_diffrn_measurement_device_type         KappaCCD
_diffrn_measurement_method              'CCD rotation images, thick slices'
_diffrn_reflns_av_R_equivalents         0.0787
_diffrn_reflns_av_unetI/netI            0.0526
_diffrn_reflns_number                   48350
_diffrn_reflns_limit_h_min              -12
_diffrn_reflns_limit_h_max              12
_diffrn_reflns_limit_k_min              -29
_diffrn_reflns_limit_k_max              29
_diffrn_reflns_limit_l_min              -21
_diffrn_reflns_limit_l_max              21
_diffrn_reflns_theta_min                3.47
_diffrn_reflns_theta_max                26.73
_diffrn_reflns_theta_full               26.73
_diffrn_measured_fraction_theta_full
                                        0.998
_diffrn_measured_fraction_theta_max
                                        0.998
_reflns_number_total                    8127
_reflns_number_gt                       6180
_reflns_threshold_expression            >2sigma(I)
 
#----------------------------------------------------------------------------#
#                   COMPUTER PROGRAMS USED                                   #
#----------------------------------------------------------------------------#
 
_computing_data_collection              'Collect (Nonius BV, 1997-2000)'
_computing_cell_refinement
                                       'HKL Scalepack (Otwinowski & Minor 1997)'
_computing_data_reduction
                             'HKL Denzo and Scalepack (Otwinowski & Minor 1997)'
_computing_structure_solution           'SHELXS-97 (Sheldrick, 1997)'
_computing_structure_refinement         'SHELXL-97 (Sheldrick, 1997)'
_computing_molecular_graphics           'Ortep-3 for Windows (Farrugia, 1997)'
_computing_publication_material
                                   'WinGX publication routines (Farrugia, 1999)'
 
#----------------------------------------------------------------------------#
#                   REFINEMENT INFORMATION                                   #
#----------------------------------------------------------------------------#
 
_refine_special_details
;
 Refinement of F^2^ against ALL reflections.  The weighted R-factor wR and
 goodness of fit S are based on F^2^, conventional R-factors R are based
 on F, with F set to zero for negative F^2^. The threshold expression of
 F^2^ > 2sigma(F^2^) is used only for calculating R-factors(gt) etc. and is
 not relevant to the choice of reflections for refinement.  R-factors based
 on F^2^ are statistically about twice as large as those based on F, and R-
 factors based on ALL data will be even larger.
;
_refine_ls_structure_factor_coef        Fsqd
_refine_ls_matrix_type                  full
_refine_ls_weighting_scheme             calc
_refine_ls_weighting_details
         'calc w=1/[\s^2^(Fo^2^)+(0.0565P)^2^+4.1124P] where P=(Fo^2^+2Fc^2^)/3'
_atom_sites_solution_primary            direct
_atom_sites_solution_secondary          difmap
_atom_sites_solution_hydrogens          geom
_refine_ls_hydrogen_treatment           constr
_refine_ls_extinction_method            none
_refine_ls_number_reflns                8127
_refine_ls_number_parameters            408
_refine_ls_number_restraints            0
_refine_ls_R_factor_all                 0.0702
_refine_ls_R_factor_gt                  0.0462
_refine_ls_wR_factor_ref                0.1191
_refine_ls_wR_factor_gt                 0.1082
_refine_ls_goodness_of_fit_ref          0.99
_refine_ls_restrained_S_all             0.99
_refine_ls_shift/su_max                 0.002
_refine_ls_shift/su_mean                0
_refine_diff_density_max                0.792
_refine_diff_density_min                -0.436
_refine_diff_density_rms                0.069
 
#----------------------------------------------------------------------------#
#                   ATOMIC TYPES, COORDINATES AND THERMAL PARAMETERS         #
#----------------------------------------------------------------------------#
 
loop_
    _atom_type_symbol
    _atom_type_description
    _atom_type_scat_dispersion_real
    _atom_type_scat_dispersion_imag
    _atom_type_scat_source
C C 0.0033 0.0016 'International Tables Vol C Tables 4.2.6.8 and 6.1.1.4'
H H 0 0 'International Tables Vol C Tables 4.2.6.8 and 6.1.1.4'
Ge Ge 0.1547 1.8001 'International Tables Vol C Tables 4.2.6.8 and 6.1.1.4'
N N 0.0061 0.0033 'International Tables Vol C Tables 4.2.6.8 and 6.1.1.4'
P P 0.1023 0.0942 'International Tables Vol C Tables 4.2.6.8 and 6.1.1.4'
 
loop_
    _atom_site_label
    _atom_site_type_symbol
    _atom_site_fract_x
    _atom_site_fract_y
    _atom_site_fract_z
    _atom_site_U_iso_or_equiv
    _atom_site_adp_type
    _atom_site_occupancy
    _atom_site_symmetry_multiplicity
    _atom_site_calc_flag
    _atom_site_refinement_flags
    _atom_site_disorder_assembly
    _atom_site_disorder_group
Ge Ge 0.79767(3) 0.817848(11) 0.205506(17) 0.01976(9) Uani 1 1 d . . .
P P 0.84135(8) 0.83091(3) 0.35453(4) 0.02663(17) Uani 1 1 d . . .
N1 N 0.6587(2) 0.88229(9) 0.15247(13) 0.0200(5) Uani 1 1 d . . .
N2 N 0.6287(2) 0.76332(9) 0.17210(14) 0.0219(5) Uani 1 1 d . . .
C1 C 0.5584(3) 0.87245(11) 0.07964(17) 0.0233(6) Uani 1 1 d . . .
C2 C 0.5093(3) 0.81836(12) 0.05066(17) 0.0269(6) Uani 1 1 d . . .
H2 H 0.4578 0.8148 -0.0069 0.032 Uiso 1 1 calc R . .
C3 C 0.5284(3) 0.76885(11) 0.09807(17) 0.0254(6) Uani 1 1 d . . .
C4 C 0.4870(3) 0.92103(12) 0.02297(19) 0.0340(7) Uani 1 1 d . . .
H4A H 0.4798 0.9539 0.0562 0.051 Uiso 1 1 calc R . .
H4B H 0.392 0.9093 -0.0128 0.051 Uiso 1 1 calc R . .
H4C H 0.5429 0.9314 -0.0112 0.051 Uiso 1 1 calc R . .
C5 C 0.4252(3) 0.72108(13) 0.0623(2) 0.0396(8) Uani 1 1 d . . .
H5A H 0.4704 0.6847 0.0838 0.059 Uiso 1 1 calc R . .
H5B H 0.3966 0.7214 0.0018 0.059 Uiso 1 1 calc R . .
H5C H 0.3417 0.7262 0.078 0.059 Uiso 1 1 calc R . .
C6 C 0.6887(3) 0.94032(11) 0.17906(17) 0.0227(6) Uani 1 1 d . . .
C7 C 0.6271(3) 0.96304(12) 0.23334(17) 0.0259(6) Uani 1 1 d . . .
C8 C 0.6553(3) 1.02024(13) 0.2564(2) 0.0354(7) Uani 1 1 d . . .
H8 H 0.6136 1.0369 0.2924 0.042 Uiso 1 1 calc R . .
C9 C 0.7418(3) 1.05256(13) 0.2279(2) 0.0397(8) Uani 1 1 d . . .
H9 H 0.7586 1.0913 0.2441 0.048 Uiso 1 1 calc R . .
C10 C 0.8044(3) 1.02933(12) 0.1761(2) 0.0337(7) Uani 1 1 d . . .
H10 H 0.8653 1.0521 0.1577 0.04 Uiso 1 1 calc R . .
C11 C 0.7796(3) 0.97278(11) 0.15020(18) 0.0270(6) Uani 1 1 d . . .
C12 C 0.5318(3) 0.92759(13) 0.26550(18) 0.0299(6) Uani 1 1 d . . .
H12 H 0.5643 0.8873 0.2677 0.036 Uiso 1 1 calc R . .
C13 C 0.3786(3) 0.92916(16) 0.2071(2) 0.0465(9) Uani 1 1 d . . .
H13A H 0.3206 0.9056 0.2296 0.07 Uiso 1 1 calc R . .
H13B H 0.3725 0.9145 0.1529 0.07 Uiso 1 1 calc R . .
H13C H 0.3441 0.9684 0.2013 0.07 Uiso 1 1 calc R . .
C14 C 0.5409(4) 0.94369(17) 0.3527(2) 0.0513(9) Uani 1 1 d . . .
H14A H 0.4773 0.9193 0.3697 0.077 Uiso 1 1 calc R . .
H14B H 0.513 0.9835 0.3535 0.077 Uiso 1 1 calc R . .
H14C H 0.6383 0.9385 0.3909 0.077 Uiso 1 1 calc R . .
C15 C 0.8544(3) 0.94798(12) 0.09529(19) 0.0302(6) Uani 1 1 d . . .
H15 H 0.8175 0.9086 0.0797 0.036 Uiso 1 1 calc R . .
C16 C 0.8266(4) 0.98152(15) 0.0154(2) 0.0444(8) Uani 1 1 d . . .
H16A H 0.7244 0.984 -0.0146 0.067 Uiso 1 1 calc R . .
H16B H 0.8716 0.9622 -0.0192 0.067 Uiso 1 1 calc R . .
H16C H 0.866 1.0199 0.0287 0.067 Uiso 1 1 calc R . .
C17 C 1.0129(3) 0.94365(16) 0.1418(2) 0.0454(9) Uani 1 1 d . . .
H17A H 1.0304 0.9219 0.1928 0.068 Uiso 1 1 calc R . .
H17B H 1.0528 0.9819 0.1555 0.068 Uiso 1 1 calc R . .
H17C H 1.0576 0.9244 0.107 0.068 Uiso 1 1 calc R . .
C18 C 0.6325(3) 0.71187(11) 0.21832(17) 0.0251(6) Uani 1 1 d . . .
C19 C 0.5561(3) 0.70982(13) 0.2720(2) 0.0341(7) Uani 1 1 d . . .
C20 C 0.5682(4) 0.66011(15) 0.3190(2) 0.0445(8) Uani 1 1 d . . .
H20 H 0.5194 0.6576 0.357 0.053 Uiso 1 1 calc R . .
C21 C 0.6495(4) 0.61496(14) 0.3112(2) 0.0473(9) Uani 1 1 d . . .
H21 H 0.6576 0.582 0.3444 0.057 Uiso 1 1 calc R . .
C22 C 0.7189(4) 0.61736(13) 0.2555(2) 0.0416(8) Uani 1 1 d . . .
H22 H 0.7726 0.5855 0.2499 0.05 Uiso 1 1 calc R . .
C23 C 0.7124(3) 0.66551(12) 0.20700(18) 0.0311(7) Uani 1 1 d . . .
C24 C 0.4573(4) 0.75737(15) 0.2769(2) 0.0445(8) Uani 1 1 d . . .
H24 H 0.4665 0.7893 0.2408 0.053 Uiso 1 1 calc R . .
C25 C 0.3016(4) 0.7366(2) 0.2438(3) 0.0818(15) Uani 1 1 d . . .
H25A H 0.2391 0.7678 0.247 0.123 Uiso 1 1 calc R . .
H25B H 0.2908 0.7047 0.2775 0.123 Uiso 1 1 calc R . .
H25C H 0.2764 0.7244 0.1862 0.123 Uiso 1 1 calc R . .
C26 C 0.4907(5) 0.78028(18) 0.3636(3) 0.0622(11) Uani 1 1 d . . .
H26A H 0.4252 0.8112 0.3627 0.093 Uiso 1 1 calc R . .
H26B H 0.5881 0.7947 0.3846 0.093 Uiso 1 1 calc R . .
H26C H 0.4806 0.7498 0.3998 0.093 Uiso 1 1 calc R . .
C27 C 0.7809(4) 0.66514(13) 0.1417(2) 0.0378(8) Uani 1 1 d . . .
H27 H 0.7647 0.7033 0.1143 0.045 Uiso 1 1 calc R . .
C28 C 0.7125(4) 0.62053(19) 0.0751(2) 0.0665(12) Uani 1 1 d . . .
H28A H 0.6101 0.6269 0.0521 0.1 Uiso 1 1 calc R . .
H28B H 0.7315 0.5825 0.0997 0.1 Uiso 1 1 calc R . .
H28C H 0.7521 0.6236 0.031 0.1 Uiso 1 1 calc R . .
C29 C 0.9392(4) 0.65505(17) 0.1772(2) 0.0498(9) Uani 1 1 d . . .
H29A H 0.9777 0.6557 0.1324 0.075 Uiso 1 1 calc R . .
H29B H 0.9581 0.618 0.2048 0.075 Uiso 1 1 calc R . .
H29C H 0.9841 0.685 0.2173 0.075 Uiso 1 1 calc R . .
C30 C 1.0111(4) 0.87394(13) 0.38202(19) 0.0386(8) Uani 1 1 d . . .
H30 H 1.0717 0.856 0.3538 0.046 Uiso 1 1 calc R . .
C31 C 1.0953(4) 0.87424(15) 0.4756(2) 0.0518(10) Uani 1 1 d . . .
H31A H 1.1187 0.8347 0.4952 0.062 Uiso 1 1 calc R . .
H31B H 1.0363 0.8909 0.5051 0.062 Uiso 1 1 calc R . .
C32 C 1.2340(4) 0.90918(17) 0.4959(2) 0.0614(11) Uani 1 1 d . . .
H32A H 1.2838 0.91 0.5566 0.074 Uiso 1 1 calc R . .
H32B H 1.2968 0.8905 0.4707 0.074 Uiso 1 1 calc R . .
C33 C 1.2049(5) 0.96754(17) 0.4648(3) 0.0654(12) Uani 1 1 d . . .
H33A H 1.2955 0.9879 0.4759 0.079 Uiso 1 1 calc R . .
H33B H 1.151 0.9876 0.4946 0.079 Uiso 1 1 calc R . .
C34 C 1.1205(5) 0.96877(18) 0.3722(3) 0.0715(14) Uani 1 1 d . . .
H34A H 1.1786 0.9528 0.3416 0.086 Uiso 1 1 calc R . .
H34B H 1.0969 1.0086 0.3539 0.086 Uiso 1 1 calc R . .
C35 C 0.9827(4) 0.93386(15) 0.3521(2) 0.0565(11) Uani 1 1 d . . .
H35A H 0.9208 0.9522 0.3783 0.068 Uiso 1 1 calc R . .
H35B H 0.9318 0.9338 0.2915 0.068 Uiso 1 1 calc R . .
C36 C 0.9101(3) 0.75719(12) 0.39050(17) 0.0268(6) Uani 1 1 d . . .
H36 H 0.8369 0.7307 0.3543 0.032 Uiso 1 1 calc R . .
C37 C 0.9145(4) 0.74521(14) 0.47821(19) 0.0376(7) Uani 1 1 d . . .
H37A H 0.8201 0.7528 0.4814 0.045 Uiso 1 1 calc R . .
H37B H 0.983 0.7713 0.5171 0.045 Uiso 1 1 calc R . .
C38 C 0.9570(4) 0.68392(14) 0.5044(2) 0.0446(8) Uani 1 1 d . . .
H38A H 0.9666 0.6791 0.5631 0.053 Uiso 1 1 calc R . .
H38B H 0.8812 0.6581 0.4708 0.053 Uiso 1 1 calc R . .
C39 C 1.0952(4) 0.66752(14) 0.4941(2) 0.0427(8) Uani 1 1 d . . .
H39A H 1.1735 0.6902 0.5326 0.051 Uiso 1 1 calc R . .
H39B H 1.1152 0.6268 0.5081 0.051 Uiso 1 1 calc R . .
C40 C 1.0877(4) 0.67787(13) 0.4060(2) 0.0383(7) Uani 1 1 d . . .
H40A H 1.0161 0.6522 0.3682 0.046 Uiso 1 1 calc R . .
H40B H 1.1805 0.6688 0.4014 0.046 Uiso 1 1 calc R . .
C41 C 1.0488(3) 0.73960(12) 0.37975(18) 0.0302(7) Uani 1 1 d . . .
H41A H 1.0392 0.7442 0.321 0.036 Uiso 1 1 calc R . .
H41B H 1.126 0.7649 0.4134 0.036 Uiso 1 1 calc R . .
 
loop_
    _atom_site_aniso_label
    _atom_site_aniso_U_11
    _atom_site_aniso_U_22
    _atom_site_aniso_U_33
    _atom_site_aniso_U_23
    _atom_site_aniso_U_13
    _atom_site_aniso_U_12
Ge 0.01728(15) 0.01605(14) 0.02340(15) 0.00100(11) 0.00400(11) -0.00015(11)
P 0.0288(4) 0.0237(4) 0.0244(4) 0.0010(3) 0.0056(3) 0.0036(3)
N1 0.0186(11) 0.0158(11) 0.0245(11) 0.0017(9) 0.0061(9) -0.0004(8)
N2 0.0218(11) 0.0146(11) 0.0267(12) 0.0000(9) 0.0051(10) -0.0027(8)
C1 0.0174(13) 0.0236(14) 0.0258(14) 0.0027(11) 0.0038(11) 0.0022(10)
C2 0.0267(14) 0.0239(14) 0.0241(14) 0.0008(11) 0.0013(12) -0.0018(12)
C3 0.0219(14) 0.0215(14) 0.0288(15) -0.0043(11) 0.0041(12) -0.0016(11)
C4 0.0317(16) 0.0256(16) 0.0340(16) 0.0076(12) -0.0019(13) 0.0021(12)
C5 0.0360(18) 0.0249(16) 0.0426(18) -0.0011(13) -0.0055(15) -0.0106(13)
C6 0.0204(13) 0.0147(13) 0.0279(14) -0.0006(10) 0.0020(11) 0.0015(10)
C7 0.0186(13) 0.0243(14) 0.0309(15) -0.0015(11) 0.0038(12) 0.0029(11)
C8 0.0344(17) 0.0280(16) 0.0418(18) -0.0090(13) 0.0110(15) 0.0044(13)
C9 0.0385(18) 0.0195(15) 0.058(2) -0.0085(14) 0.0136(16) -0.0020(13)
C10 0.0278(16) 0.0217(15) 0.0507(19) -0.0023(13) 0.0126(14) -0.0049(12)
C11 0.0224(14) 0.0187(13) 0.0371(16) 0.0011(11) 0.0068(12) 0.0015(11)
C12 0.0283(16) 0.0304(16) 0.0324(16) -0.0016(12) 0.0123(13) 0.0042(12)
C13 0.0264(17) 0.060(2) 0.052(2) 0.0076(18) 0.0122(16) -0.0015(15)
C14 0.061(2) 0.056(2) 0.044(2) -0.0089(17) 0.0264(19) -0.0033(19)
C15 0.0284(15) 0.0225(15) 0.0427(17) 0.0010(12) 0.0161(14) -0.0002(12)
C16 0.048(2) 0.0390(19) 0.049(2) 0.0084(15) 0.0200(17) 0.0049(15)
C17 0.0279(17) 0.056(2) 0.051(2) -0.0021(17) 0.0123(16) 0.0078(15)
C18 0.0246(14) 0.0181(14) 0.0272(14) 0.0001(11) 0.0023(12) -0.0078(11)
C19 0.0303(16) 0.0265(16) 0.0427(18) 0.0052(13) 0.0094(14) -0.0080(12)
C20 0.0420(19) 0.043(2) 0.049(2) 0.0125(16) 0.0163(17) -0.0125(16)
C21 0.052(2) 0.0265(17) 0.052(2) 0.0166(15) 0.0054(18) -0.0098(15)
C22 0.046(2) 0.0216(16) 0.047(2) 0.0033(14) 0.0043(17) -0.0019(14)
C23 0.0348(16) 0.0192(14) 0.0303(15) -0.0019(11) 0.0002(13) -0.0044(12)
C24 0.0412(19) 0.044(2) 0.058(2) 0.0095(17) 0.0294(17) 0.0001(15)
C25 0.043(2) 0.103(4) 0.105(4) -0.010(3) 0.032(3) 0.004(2)
C26 0.077(3) 0.050(2) 0.068(3) 0.003(2) 0.036(2) 0.001(2)
C27 0.052(2) 0.0241(15) 0.0354(17) -0.0012(13) 0.0125(16) 0.0092(14)
C28 0.060(3) 0.074(3) 0.051(2) -0.026(2) 0.001(2) 0.012(2)
C29 0.048(2) 0.057(2) 0.042(2) -0.0091(17) 0.0141(17) 0.0003(18)
C30 0.0474(19) 0.0294(17) 0.0280(16) -0.0025(13) -0.0005(15) -0.0120(14)
C31 0.067(3) 0.037(2) 0.0349(18) -0.0003(15) -0.0027(18) -0.0110(17)
C32 0.057(2) 0.050(2) 0.051(2) -0.0028(18) -0.0132(19) -0.0092(19)
C33 0.063(3) 0.046(2) 0.060(2) -0.0005(19) -0.012(2) -0.0171(19)
C34 0.065(3) 0.051(2) 0.067(3) 0.020(2) -0.016(2) -0.027(2)
C35 0.055(2) 0.040(2) 0.052(2) 0.0098(17) -0.0089(19) -0.0031(17)
C36 0.0264(15) 0.0237(14) 0.0270(14) 0.0031(11) 0.0054(12) -0.0005(11)
C37 0.0448(19) 0.0355(17) 0.0352(17) 0.0089(14) 0.0174(15) 0.0072(14)
C38 0.056(2) 0.0348(18) 0.0443(19) 0.0154(15) 0.0196(17) 0.0014(16)
C39 0.047(2) 0.0307(17) 0.0439(19) 0.0135(14) 0.0083(16) 0.0055(14)
C40 0.0387(18) 0.0290(16) 0.0431(18) 0.0009(14) 0.0093(15) 0.0080(13)
C41 0.0314(16) 0.0266(15) 0.0301(15) 0.0040(12) 0.0077(13) 0.0035(12)
 
 
#----------------------------------------------------------------------------#
#                   MOLECULAR GEOMETRY                                       #
#----------------------------------------------------------------------------#
 
_geom_special_details
;
 All esds (except the esd in the dihedral angle between two l.s. planes)
 are estimated using the full covariance matrix.  The cell esds are taken
 into account individually in the estimation of esds in distances, angles
 and torsion angles; correlations between esds in cell parameters are only
 used when they are defined by crystal symmetry.  An approximate (isotropic)
 treatment of cell esds is used for estimating esds involving l.s. planes.
;
loop_
    _geom_bond_atom_site_label_1
    _geom_bond_atom_site_label_2
    _geom_bond_distance
    _geom_bond_site_symmetry_2
    _geom_bond_publ_flag
Ge N2 2.048(2) . ?
Ge N1 2.049(2) . ?
Ge P 2.4724(8) . ?
P C36 1.889(3) . ?
P C30 1.900(3) . ?
N1 C1 1.329(3) . ?
N1 C6 1.438(3) . ?
N2 C3 1.328(3) . ?
N2 C18 1.442(3) . ?
C1 C2 1.393(4) . ?
C1 C4 1.512(4) . ?
C2 C3 1.397(4) . ?
C2 H2 0.95 . ?
C3 C5 1.509(4) . ?
C4 H4A 0.98 . ?
C4 H4B 0.98 . ?
C4 H4C 0.98 . ?
C5 H5A 0.98 . ?
C5 H5B 0.98 . ?
C5 H5C 0.98 . ?
C6 C7 1.400(4) . ?
C6 C11 1.412(4) . ?
C7 C8 1.403(4) . ?
C7 C12 1.519(4) . ?
C8 C9 1.372(5) . ?
C8 H8 0.95 . ?
C9 C10 1.378(5) . ?
C9 H9 0.95 . ?
C10 C11 1.397(4) . ?
C10 H10 0.95 . ?
C11 C15 1.521(4) . ?
C12 C13 1.520(4) . ?
C12 C14 1.523(4) . ?
C12 H12 1 . ?
C13 H13A 0.98 . ?
C13 H13B 0.98 . ?
C13 H13C 0.98 . ?
C14 H14A 0.98 . ?
C14 H14B 0.98 . ?
C14 H14C 0.98 . ?
C15 C17 1.520(4) . ?
C15 C16 1.527(4) . ?
C15 H15 1 . ?
C16 H16A 0.98 . ?
C16 H16B 0.98 . ?
C16 H16C 0.98 . ?
C17 H17A 0.98 . ?
C17 H17B 0.98 . ?
C17 H17C 0.98 . ?
C18 C19 1.399(4) . ?
C18 C23 1.410(4) . ?
C19 C20 1.404(4) . ?
C19 C24 1.520(5) . ?
C20 C21 1.377(5) . ?
C20 H20 0.95 . ?
C21 C22 1.376(5) . ?
C21 H21 0.95 . ?
C22 C23 1.396(4) . ?
C22 H22 0.95 . ?
C23 C27 1.517(5) . ?
C24 C26 1.515(5) . ?
C24 C25 1.550(5) . ?
C24 H24 1 . ?
C25 H25A 0.98 . ?
C25 H25B 0.98 . ?
C25 H25C 0.98 . ?
C26 H26A 0.98 . ?
C26 H26B 0.98 . ?
C26 H26C 0.98 . ?
C27 C29 1.516(5) . ?
C27 C28 1.529(5) . ?
C27 H27 1 . ?
C28 H28A 0.98 . ?
C28 H28B 0.98 . ?
C28 H28C 0.98 . ?
C29 H29A 0.98 . ?
C29 H29B 0.98 . ?
C29 H29C 0.98 . ?
C30 C35 1.494(5) . ?
C30 C31 1.538(4) . ?
C30 H30 1 . ?
C31 C32 1.553(5) . ?
C31 H31A 0.99 . ?
C31 H31B 0.99 . ?
C32 C33 1.465(5) . ?
C32 H32A 0.99 . ?
C32 H32B 0.99 . ?
C33 C34 1.525(5) . ?
C33 H33A 0.99 . ?
C33 H33B 0.99 . ?
C34 C35 1.546(5) . ?
C34 H34A 0.99 . ?
C34 H34B 0.99 . ?
C35 H35A 0.99 . ?
C35 H35B 0.99 . ?
C36 C37 1.526(4) . ?
C36 C41 1.533(4) . ?
C36 H36 1 . ?
C37 C38 1.526(4) . ?
C37 H37A 0.99 . ?
C37 H37B 0.99 . ?
C38 C39 1.517(5) . ?
C38 H38A 0.99 . ?
C38 H38B 0.99 . ?
C39 C40 1.516(5) . ?
C39 H39A 0.99 . ?
C39 H39B 0.99 . ?
C40 C41 1.530(4) . ?
C40 H40A 0.99 . ?
C40 H40B 0.99 . ?
C41 H41A 0.99 . ?
C41 H41B 0.99 . ?
 
loop_
    _geom_angle_atom_site_label_1
    _geom_angle_atom_site_label_2
    _geom_angle_atom_site_label_3
    _geom_angle
    _geom_angle_site_symmetry_1
    _geom_angle_site_symmetry_3
    _geom_angle_publ_flag
N2 Ge N1 88.05(8) . . ?
N2 Ge P 101.35(7) . . ?
N1 Ge P 102.52(6) . . ?
C36 P C30 102.25(13) . . ?
C36 P Ge 97.97(9) . . ?
C30 P Ge 98.12(10) . . ?
C1 N1 C6 118.2(2) . . ?
C1 N1 Ge 117.92(17) . . ?
C6 N1 Ge 121.69(16) . . ?
C3 N2 C18 118.5(2) . . ?
C3 N2 Ge 119.10(18) . . ?
C18 N2 Ge 120.79(16) . . ?
N1 C1 C2 123.8(2) . . ?
N1 C1 C4 120.8(2) . . ?
C2 C1 C4 115.4(2) . . ?
C1 C2 C3 126.3(3) . . ?
C1 C2 H2 116.8 . . ?
C3 C2 H2 116.8 . . ?
N2 C3 C2 123.2(2) . . ?
N2 C3 C5 120.2(2) . . ?
C2 C3 C5 116.6(2) . . ?
C1 C4 H4A 109.5 . . ?
C1 C4 H4B 109.5 . . ?
H4A C4 H4B 109.5 . . ?
C1 C4 H4C 109.5 . . ?
H4A C4 H4C 109.5 . . ?
H4B C4 H4C 109.5 . . ?
C3 C5 H5A 109.5 . . ?
C3 C5 H5B 109.5 . . ?
H5A C5 H5B 109.5 . . ?
C3 C5 H5C 109.5 . . ?
H5A C5 H5C 109.5 . . ?
H5B C5 H5C 109.5 . . ?
C7 C6 C11 121.8(2) . . ?
C7 C6 N1 118.9(2) . . ?
C11 C6 N1 119.4(2) . . ?
C6 C7 C8 117.5(3) . . ?
C6 C7 C12 121.5(2) . . ?
C8 C7 C12 120.9(3) . . ?
C9 C8 C7 121.3(3) . . ?
C9 C8 H8 119.3 . . ?
C7 C8 H8 119.3 . . ?
C8 C9 C10 120.6(3) . . ?
C8 C9 H9 119.7 . . ?
C10 C9 H9 119.7 . . ?
C9 C10 C11 120.9(3) . . ?
C9 C10 H10 119.6 . . ?
C11 C10 H10 119.6 . . ?
C10 C11 C6 117.9(3) . . ?
C10 C11 C15 119.5(3) . . ?
C6 C11 C15 122.6(2) . . ?
C7 C12 C13 111.8(3) . . ?
C7 C12 C14 113.5(3) . . ?
C13 C12 C14 110.1(3) . . ?
C7 C12 H12 107 . . ?
C13 C12 H12 107 . . ?
C14 C12 H12 107 . . ?
C12 C13 H13A 109.5 . . ?
C12 C13 H13B 109.5 . . ?
H13A C13 H13B 109.5 . . ?
C12 C13 H13C 109.5 . . ?
H13A C13 H13C 109.5 . . ?
H13B C13 H13C 109.5 . . ?
C12 C14 H14A 109.5 . . ?
C12 C14 H14B 109.5 . . ?
H14A C14 H14B 109.5 . . ?
C12 C14 H14C 109.5 . . ?
H14A C14 H14C 109.5 . . ?
H14B C14 H14C 109.5 . . ?
C17 C15 C11 111.0(3) . . ?
C17 C15 C16 109.7(3) . . ?
C11 C15 C16 113.0(2) . . ?
C17 C15 H15 107.7 . . ?
C11 C15 H15 107.7 . . ?
C16 C15 H15 107.7 . . ?
C15 C16 H16A 109.5 . . ?
C15 C16 H16B 109.5 . . ?
H16A C16 H16B 109.5 . . ?
C15 C16 H16C 109.5 . . ?
H16A C16 H16C 109.5 . . ?
H16B C16 H16C 109.5 . . ?
C15 C17 H17A 109.5 . . ?
C15 C17 H17B 109.5 . . ?
H17A C17 H17B 109.5 . . ?
C15 C17 H17C 109.5 . . ?
H17A C17 H17C 109.5 . . ?
H17B C17 H17C 109.5 . . ?
C19 C18 C23 122.7(3) . . ?
C19 C18 N2 118.8(3) . . ?
C23 C18 N2 118.5(3) . . ?
C18 C19 C20 117.1(3) . . ?
C18 C19 C24 122.4(3) . . ?
C20 C19 C24 120.4(3) . . ?
C21 C20 C19 121.2(3) . . ?
C21 C20 H20 119.4 . . ?
C19 C20 H20 119.4 . . ?
C22 C21 C20 120.3(3) . . ?
C22 C21 H21 119.8 . . ?
C20 C21 H21 119.8 . . ?
C21 C22 C23 121.6(3) . . ?
C21 C22 H22 119.2 . . ?
C23 C22 H22 119.2 . . ?
C22 C23 C18 116.9(3) . . ?
C22 C23 C27 120.2(3) . . ?
C18 C23 C27 122.7(3) . . ?
C26 C24 C19 113.2(3) . . ?
C26 C24 C25 108.7(3) . . ?
C19 C24 C25 110.4(3) . . ?
C26 C24 H24 108.1 . . ?
C19 C24 H24 108.1 . . ?
C25 C24 H24 108.1 . . ?
C24 C25 H25A 109.5 . . ?
C24 C25 H25B 109.5 . . ?
H25A C25 H25B 109.5 . . ?
C24 C25 H25C 109.5 . . ?
H25A C25 H25C 109.5 . . ?
H25B C25 H25C 109.5 . . ?
C24 C26 H26A 109.5 . . ?
C24 C26 H26B 109.5 . . ?
H26A C26 H26B 109.5 . . ?
C24 C26 H26C 109.5 . . ?
H26A C26 H26C 109.5 . . ?
H26B C26 H26C 109.5 . . ?
C29 C27 C23 113.1(3) . . ?
C29 C27 C28 109.2(3) . . ?
C23 C27 C28 111.1(3) . . ?
C29 C27 H27 107.8 . . ?
C23 C27 H27 107.8 . . ?
C28 C27 H27 107.8 . . ?
C27 C28 H28A 109.5 . . ?
C27 C28 H28B 109.5 . . ?
H28A C28 H28B 109.5 . . ?
C27 C28 H28C 109.5 . . ?
H28A C28 H28C 109.5 . . ?
H28B C28 H28C 109.5 . . ?
C27 C29 H29A 109.5 . . ?
C27 C29 H29B 109.5 . . ?
H29A C29 H29B 109.5 . . ?
C27 C29 H29C 109.5 . . ?
H29A C29 H29C 109.5 . . ?
H29B C29 H29C 109.5 . . ?
C35 C30 C31 109.1(3) . . ?
C35 C30 P 111.7(2) . . ?
C31 C30 P 112.4(2) . . ?
C35 C30 H30 107.8 . . ?
C31 C30 H30 107.8 . . ?
P C30 H30 107.8 . . ?
C30 C31 C32 111.2(3) . . ?
C30 C31 H31A 109.4 . . ?
C32 C31 H31A 109.4 . . ?
C30 C31 H31B 109.4 . . ?
C32 C31 H31B 109.4 . . ?
H31A C31 H31B 108 . . ?
C33 C32 C31 111.3(3) . . ?
C33 C32 H32A 109.4 . . ?
C31 C32 H32A 109.4 . . ?
C33 C32 H32B 109.4 . . ?
C31 C32 H32B 109.4 . . ?
H32A C32 H32B 108 . . ?
C32 C33 C34 111.6(3) . . ?
C32 C33 H33A 109.3 . . ?
C34 C33 H33A 109.3 . . ?
C32 C33 H33B 109.3 . . ?
C34 C33 H33B 109.3 . . ?
H33A C33 H33B 108 . . ?
C33 C34 C35 110.6(4) . . ?
C33 C34 H34A 109.5 . . ?
C35 C34 H34A 109.5 . . ?
C33 C34 H34B 109.5 . . ?
C35 C34 H34B 109.5 . . ?
H34A C34 H34B 108.1 . . ?
C30 C35 C34 112.1(3) . . ?
C30 C35 H35A 109.2 . . ?
C34 C35 H35A 109.2 . . ?
C30 C35 H35B 109.2 . . ?
C34 C35 H35B 109.2 . . ?
H35A C35 H35B 107.9 . . ?
C37 C36 C41 111.2(2) . . ?
C37 C36 P 112.0(2) . . ?
C41 C36 P 116.94(19) . . ?
C37 C36 H36 105.2 . . ?
C41 C36 H36 105.2 . . ?
P C36 H36 105.2 . . ?
C36 C37 C38 112.0(3) . . ?
C36 C37 H37A 109.2 . . ?
C38 C37 H37A 109.2 . . ?
C36 C37 H37B 109.2 . . ?
C38 C37 H37B 109.2 . . ?
H37A C37 H37B 107.9 . . ?
C39 C38 C37 112.3(3) . . ?
C39 C38 H38A 109.1 . . ?
C37 C38 H38A 109.1 . . ?
C39 C38 H38B 109.1 . . ?
C37 C38 H38B 109.1 . . ?
H38A C38 H38B 107.9 . . ?
C40 C39 C38 110.7(3) . . ?
C40 C39 H39A 109.5 . . ?
C38 C39 H39A 109.5 . . ?
C40 C39 H39B 109.5 . . ?
C38 C39 H39B 109.5 . . ?
H39A C39 H39B 108.1 . . ?
C39 C40 C41 111.5(3) . . ?
C39 C40 H40A 109.3 . . ?
C41 C40 H40A 109.3 . . ?
C39 C40 H40B 109.3 . . ?
C41 C40 H40B 109.3 . . ?
H40A C40 H40B 108 . . ?
C40 C41 C36 111.7(2) . . ?
C40 C41 H41A 109.3 . . ?
C36 C41 H41A 109.3 . . ?
C40 C41 H41B 109.3 . . ?
C36 C41 H41B 109.3 . . ?
H41A C41 H41B 107.9 . . ?

#===END


data_(2a)-jul510
 
_audit_creation_date            2010-07-08T08:39:04-00:00
_audit_creation_method         'WinGX routine CIF_UPDATE'
_audit_conform_dict_name        cif_core.dic
_audit_conform_dict_version     2.2
_audit_conform_dict_location    ftp://ftp.iucr.org/pub/cif_core.dic
_publ_requested_category        FM
 
#----------------------------------------------------------------------------#
#                   CHEMICAL INFORMATION                                     #
#----------------------------------------------------------------------------#
 
_chemical_name_systematic
;
 ?
;
_chemical_formula_moiety                '2(C41 H51 N2 P Sn), C7 H8'
_chemical_formula_sum                   'C89 H110 N4 P2 Sn2'
_chemical_formula_weight                1535.14
_chemical_compound_source               'synthesis as described'
 
#----------------------------------------------------------------------------#
#                   UNIT CELL INFORMATION                                    #
#----------------------------------------------------------------------------#
 
_symmetry_cell_setting                  triclinic
_symmetry_space_group_name_H-M          'P -1'
_symmetry_space_group_name_Hall         '-P 1'
_symmetry_Int_Tables_number             2
loop_
    _symmetry_equiv_pos_as_xyz
'x, y, z'
'-x, -y, -z'
 
_cell_length_a                          12.6382(3)
_cell_length_b                          17.6553(4)
_cell_length_c                          19.5975(4)
_cell_angle_alpha                       69.422(1)
_cell_angle_beta                        84.810(1)
_cell_angle_gamma                       74.862(1)
_cell_volume                            3951.75(15)
_cell_formula_units_Z                   2
_cell_measurement_temperature           173(2)
_cell_measurement_reflns_used           32105
_cell_measurement_theta_min             3.395
_cell_measurement_theta_max             27.103
_cell_measurement_wavelength            0.71073
 
#----------------------------------------------------------------------------#
#                   CRYSTAL INFORMATION                                      #
#----------------------------------------------------------------------------#
 
_exptl_crystal_description              Prism
_exptl_crystal_colour                   'Dark orange'
_exptl_crystal_size_max                 0.16
_exptl_crystal_size_mid                 0.1
_exptl_crystal_size_min                 0.08
_exptl_crystal_density_diffrn           1.29
_exptl_crystal_density_method           'not measured'
_exptl_crystal_F_000                    1604
_exptl_special_details
;
 ?
;
 
#----------------------------------------------------------------------------#
#                   ABSORPTION CORRECTION                                    #
#----------------------------------------------------------------------------#
 
_exptl_absorpt_coefficient_mu           0.719
_exptl_absorpt_correction_type          multi-scan
_exptl_absorpt_process_details
;
        [c.f. r.h. blessing, acta cryst. (1995), a51, 33-38]
;
_exptl_absorpt_correction_T_min         0.861
_exptl_absorpt_correction_T_max         0.9641
 
#----------------------------------------------------------------------------#
#                   DATA COLLECTION                                          #
#----------------------------------------------------------------------------#
 
_diffrn_source                          'Enraf Nonius FR590'
_diffrn_ambient_temperature             173(2)
_diffrn_radiation_wavelength            0.7107
_diffrn_radiation_type                  MoK\a
_diffrn_radiation_monochromator         graphite
_diffrn_radiation_probe                 x-ray
_diffrn_detector                        'CCD plate'
_diffrn_orient_matrix_type              'by Nonius Collect from scalepack cell'
_diffrn_orient_matrix_ub_11             0.721148E-1
_diffrn_orient_matrix_ub_12             0.00903
_diffrn_orient_matrix_ub_13             0.80035E-2
_diffrn_orient_matrix_ub_21             0.26824E-1
_diffrn_orient_matrix_ub_22             -0.64741E-2
_diffrn_orient_matrix_ub_23             -0.477166E-1
_diffrn_orient_matrix_ub_31             -0.282655E-1
_diffrn_orient_matrix_ub_32             0.614215E-1
_diffrn_orient_matrix_ub_33             -0.250964E-1
_diffrn_measurement_device              '95mm CCD camera on \k-goniostat'
_diffrn_measurement_device_type         KappaCCD
_diffrn_measurement_method              'CCD rotation images, thick slices'
_diffrn_reflns_av_R_equivalents         0.0894
_diffrn_reflns_av_unetI/netI            0.0901
_diffrn_reflns_number                   66909
_diffrn_reflns_limit_h_min              -16
_diffrn_reflns_limit_h_max              16
_diffrn_reflns_limit_k_min              -22
_diffrn_reflns_limit_k_max              22
_diffrn_reflns_limit_l_min              -24
_diffrn_reflns_limit_l_max              25
_diffrn_reflns_theta_min                3.4
_diffrn_reflns_theta_max                27.09
_diffrn_reflns_theta_full               27.09
_diffrn_measured_fraction_theta_full
                                        0.997
_diffrn_measured_fraction_theta_max
                                        0.997
_reflns_number_total                    17382
_reflns_number_gt                       11616
_reflns_threshold_expression            >2sigma(I)
 
#----------------------------------------------------------------------------#
#                   COMPUTER PROGRAMS USED                                   #
#----------------------------------------------------------------------------#
 
_computing_data_collection              'Collect (Nonius BV, 1997-2000)'
_computing_cell_refinement
                                       'HKL Scalepack (Otwinowski & Minor 1997)'
_computing_data_reduction
                             'HKL Denzo and Scalepack (Otwinowski & Minor 1997)'
_computing_structure_solution           'SHELXS-86 (Sheldrick, 1986)'
_computing_structure_refinement         'SHELXL-97 (Sheldrick, 1997)'
_computing_molecular_graphics           'Ortep-3 for Windows (Farrugia, 1997)'
_computing_publication_material
                                   'WinGX publication routines (Farrugia, 1999)'
 
#----------------------------------------------------------------------------#
#                   REFINEMENT INFORMATION                                   #
#----------------------------------------------------------------------------#
 
_refine_special_details
;
 The toluene solvate was modelled as a rigid body with carbon atoms left as
 isotropic

 Refinement of F^2^ against ALL reflections.  The weighted R-factor wR and
 goodness of fit S are based on F^2^, conventional R-factors R are based
 on F, with F set to zero for negative F^2^. The threshold expression of
 F^2^ > 2sigma(F^2^) is used only for calculating R-factors(gt) etc. and is
 not relevant to the choice of reflections for refinement.  R-factors based
 on F^2^ are statistically about twice as large as those based on F, and R-
 factors based on ALL data will be even larger.
;
_refine_ls_structure_factor_coef        Fsqd
_refine_ls_matrix_type                  full
_refine_ls_weighting_scheme             calc
_refine_ls_weighting_details
         'calc w=1/[\s^2^(Fo^2^)+(0.0546P)^2^+7.3332P] where P=(Fo^2^+2Fc^2^)/3'
_atom_sites_solution_primary            direct
_atom_sites_solution_secondary          difmap
_atom_sites_solution_hydrogens          geom
_refine_ls_hydrogen_treatment           constr
_refine_ls_extinction_method            none
_refine_ls_number_reflns                17382
_refine_ls_number_parameters            828
_refine_ls_number_restraints            1
_refine_ls_R_factor_all                 0.0994
_refine_ls_R_factor_gt                  0.0553
_refine_ls_wR_factor_ref                0.1391
_refine_ls_wR_factor_gt                 0.1229
_refine_ls_goodness_of_fit_ref          1.03
_refine_ls_restrained_S_all             1.038
_refine_ls_shift/su_max                 0.001
_refine_ls_shift/su_mean                0
_refine_diff_density_max                1.809
_refine_diff_density_min                -0.831
_refine_diff_density_rms                0.11
 
#----------------------------------------------------------------------------#
#                   ATOMIC TYPES, COORDINATES AND THERMAL PARAMETERS         #
#----------------------------------------------------------------------------#
 
loop_
    _atom_type_symbol
    _atom_type_description
    _atom_type_scat_dispersion_real
    _atom_type_scat_dispersion_imag
    _atom_type_scat_source
C C 0.0033 0.0016 'International Tables Vol C Tables 4.2.6.8 and 6.1.1.4'
H H 0 0 'International Tables Vol C Tables 4.2.6.8 and 6.1.1.4'
N N 0.0061 0.0033 'International Tables Vol C Tables 4.2.6.8 and 6.1.1.4'
P P 0.1023 0.0942 'International Tables Vol C Tables 4.2.6.8 and 6.1.1.4'
Sn Sn -0.6537 1.4246 'International Tables Vol C Tables 4.2.6.8 and 6.1.1.4'
 
loop_
    _atom_site_label
    _atom_site_type_symbol
    _atom_site_fract_x
    _atom_site_fract_y
    _atom_site_fract_z
    _atom_site_U_iso_or_equiv
    _atom_site_adp_type
    _atom_site_occupancy
    _atom_site_symmetry_multiplicity
    _atom_site_calc_flag
    _atom_site_refinement_flags
    _atom_site_disorder_assembly
    _atom_site_disorder_group
Sn1 Sn 0.27748(2) 0.634716(18) 0.194022(16) 0.02040(9) Uani 1 1 d . . .
Sn2 Sn 0.75932(3) 0.157963(19) 0.180052(16) 0.02345(9) Uani 1 1 d . . .
P1 P 0.08993(10) 0.72459(8) 0.22824(7) 0.0279(3) Uani 1 1 d . . .
P2 P 0.56240(10) 0.24216(7) 0.20426(6) 0.0240(3) Uani 1 1 d . . .
N1 N 0.2246(3) 0.5171(2) 0.22614(18) 0.0184(8) Uani 1 1 d . . .
N2 N 0.3706(3) 0.5728(2) 0.29797(19) 0.0228(8) Uani 1 1 d . . .
N3 N 0.7230(3) 0.0341(2) 0.2217(2) 0.0259(9) Uani 1 1 d . . .
N4 N 0.8428(3) 0.1156(2) 0.2870(2) 0.0243(8) Uani 1 1 d . . .
C1 C 0.2980(3) 0.4448(3) 0.2543(2) 0.0209(9) Uani 1 1 d . . .
C2 C 0.3949(4) 0.4365(3) 0.2884(2) 0.0240(10) Uani 1 1 d . . .
H2 H 0.4487 0.3855 0.2948 0.029 Uiso 1 1 calc R . .
C3 C 0.4238(3) 0.4925(3) 0.3144(2) 0.0226(10) Uani 1 1 d . . .
C4 C 0.2778(4) 0.3650(3) 0.2514(3) 0.0292(11) Uani 1 1 d . . .
H4A H 0.1988 0.3696 0.2524 0.044 Uiso 1 1 calc R . .
H4B H 0.3127 0.3177 0.2934 0.044 Uiso 1 1 calc R . .
H4C H 0.3089 0.3562 0.2063 0.044 Uiso 1 1 calc R . .
C5 C 0.5197(4) 0.4567(3) 0.3670(3) 0.0377(13) Uani 1 1 d . . .
H5A H 0.5652 0.4967 0.3562 0.057 Uiso 1 1 calc R . .
H5B H 0.5636 0.4044 0.3618 0.057 Uiso 1 1 calc R . .
H5C H 0.4922 0.4459 0.417 0.057 Uiso 1 1 calc R . .
C6 C 0.1213(3) 0.5186(3) 0.1989(2) 0.0197(9) Uani 1 1 d . . .
C7 C 0.0294(4) 0.5206(3) 0.2447(2) 0.0222(10) Uani 1 1 d . . .
C8 C -0.0698(4) 0.5224(3) 0.2174(3) 0.0291(11) Uani 1 1 d . . .
H8 H -0.1326 0.5216 0.248 0.035 Uiso 1 1 calc R . .
C9 C -0.0782(4) 0.5255(3) 0.1465(3) 0.0365(12) Uani 1 1 d . . .
H9 H -0.1468 0.5281 0.1285 0.044 Uiso 1 1 calc R . .
C10 C 0.0128(4) 0.5249(3) 0.1018(3) 0.0328(12) Uani 1 1 d . . .
H10 H 0.0057 0.5279 0.053 0.039 Uiso 1 1 calc R . .
C11 C 0.1151(4) 0.5200(3) 0.1271(2) 0.0225(10) Uani 1 1 d . . .
C12 C 0.0371(4) 0.5199(3) 0.3222(2) 0.0250(10) Uani 1 1 d . . .
H12 H 0.0929 0.5511 0.3217 0.03 Uiso 1 1 calc R . .
C13 C 0.0769(5) 0.4312(3) 0.3766(3) 0.0398(13) Uani 1 1 d . . .
H13A H 0.0805 0.4337 0.4255 0.06 Uiso 1 1 calc R . .
H13B H 0.1498 0.4054 0.3623 0.06 Uiso 1 1 calc R . .
H13C H 0.0257 0.3979 0.3767 0.06 Uiso 1 1 calc R . .
C14 C -0.0702(4) 0.5638(3) 0.3491(3) 0.0390(13) Uani 1 1 d . . .
H14A H -0.0604 0.5614 0.3989 0.059 Uiso 1 1 calc R . .
H14B H -0.1277 0.5361 0.3485 0.059 Uiso 1 1 calc R . .
H14C H -0.0914 0.6223 0.3171 0.059 Uiso 1 1 calc R . .
C15 C 0.2134(4) 0.5134(3) 0.0777(2) 0.0272(11) Uani 1 1 d . . .
H15 H 0.28 0.5025 0.1069 0.033 Uiso 1 1 calc R . .
C16 C 0.2074(5) 0.5951(4) 0.0134(3) 0.0440(14) Uani 1 1 d . . .
H16A H 0.2722 0.5886 -0.0175 0.066 Uiso 1 1 calc R . .
H16B H 0.2051 0.6403 0.0319 0.066 Uiso 1 1 calc R . .
H16C H 0.1412 0.6085 -0.0153 0.066 Uiso 1 1 calc R . .
C17 C 0.2280(4) 0.4408(4) 0.0489(3) 0.0420(14) Uani 1 1 d . . .
H17A H 0.2927 0.4387 0.0174 0.063 Uiso 1 1 calc R . .
H17B H 0.1629 0.4491 0.0209 0.063 Uiso 1 1 calc R . .
H17C H 0.2375 0.3881 0.09 0.063 Uiso 1 1 calc R . .
C18 C 0.3912(4) 0.6199(3) 0.3399(2) 0.0265(10) Uani 1 1 d . . .
C19 C 0.3402(4) 0.6106(3) 0.4083(3) 0.0328(12) Uani 1 1 d . . .
C20 C 0.3567(4) 0.6595(4) 0.4468(3) 0.0428(14) Uani 1 1 d . . .
H20 H 0.3229 0.654 0.4931 0.051 Uiso 1 1 calc R . .
C21 C 0.4212(4) 0.7160(4) 0.4192(3) 0.0448(14) Uani 1 1 d . . .
H21 H 0.4311 0.7491 0.4461 0.054 Uiso 1 1 calc R . .
C22 C 0.4706(4) 0.7237(3) 0.3527(3) 0.0382(13) Uani 1 1 d . . .
H22 H 0.5148 0.7625 0.3339 0.046 Uiso 1 1 calc R . .
C23 C 0.4579(4) 0.6762(3) 0.3120(3) 0.0280(11) Uani 1 1 d . . .
C24 C 0.2670(4) 0.5505(4) 0.4415(3) 0.0409(13) Uani 1 1 d . . .
H24 H 0.2692 0.5172 0.4091 0.049 Uiso 1 1 calc R . .
C25 C 0.3064(5) 0.4896(4) 0.5179(3) 0.0540(16) Uani 1 1 d . . .
H25A H 0.2579 0.4518 0.5371 0.081 Uiso 1 1 calc R . .
H25B H 0.3051 0.5212 0.5504 0.081 Uiso 1 1 calc R . .
H25C H 0.3814 0.4571 0.5148 0.081 Uiso 1 1 calc R . .
C26 C 0.1482(4) 0.5983(4) 0.4461(3) 0.0516(16) Uani 1 1 d . . .
H26A H 0.1025 0.5586 0.4673 0.077 Uiso 1 1 calc R . .
H26B H 0.1213 0.6346 0.3971 0.077 Uiso 1 1 calc R . .
H26C H 0.1445 0.6323 0.4769 0.077 Uiso 1 1 calc R . .
C27 C 0.5178(4) 0.6862(3) 0.2395(3) 0.0314(11) Uani 1 1 d . . .
H27 H 0.4978 0.6486 0.2175 0.038 Uiso 1 1 calc R . .
C28 C 0.6422(4) 0.6599(4) 0.2505(4) 0.0556(17) Uani 1 1 d . . .
H28A H 0.6787 0.6664 0.2032 0.083 Uiso 1 1 calc R . .
H28B H 0.6639 0.6014 0.2823 0.083 Uiso 1 1 calc R . .
H28C H 0.6637 0.6952 0.2731 0.083 Uiso 1 1 calc R . .
C29 C 0.4810(5) 0.7761(4) 0.1866(3) 0.0512(15) Uani 1 1 d . . .
H29A H 0.5197 0.7811 0.1402 0.077 Uiso 1 1 calc R . .
H29B H 0.498 0.8145 0.2075 0.077 Uiso 1 1 calc R . .
H29C H 0.4018 0.7901 0.1783 0.077 Uiso 1 1 calc R . .
C30 C 0.0324(4) 0.7490(3) 0.1379(3) 0.0323(12) Uani 1 1 d . . .
C31 C -0.0636(5) 0.7275(4) 0.1336(4) 0.0563(17) Uani 1 1 d . . .
H31 H -0.0984 0.7012 0.1774 0.068 Uiso 1 1 calc R . .
C32 C -0.1107(7) 0.7431(5) 0.0675(5) 0.091(3) Uani 1 1 d . . .
H32 H -0.1769 0.7276 0.0663 0.109 Uiso 1 1 calc R . .
C33 C -0.0611(7) 0.7811(5) 0.0032(5) 0.082(3) Uani 1 1 d . . .
H33 H -0.0929 0.7919 -0.0425 0.098 Uiso 1 1 calc R . .
C34 C 0.0333(6) 0.8029(4) 0.0059(4) 0.0628(19) Uani 1 1 d . . .
H34 H 0.0668 0.83 -0.0382 0.075 Uiso 1 1 calc R . .
C35 C 0.0813(5) 0.7862(3) 0.0719(3) 0.0404(13) Uani 1 1 d . . .
H35 H 0.1487 0.8002 0.0725 0.048 Uiso 1 1 calc R . .
C36 C 0.1263(4) 0.8216(3) 0.2199(3) 0.0309(11) Uani 1 1 d . . .
C37 C 0.0856(5) 0.8988(3) 0.1663(3) 0.0457(14) Uani 1 1 d . . .
H37 H 0.042 0.9021 0.1279 0.055 Uiso 1 1 calc R . .
C38 C 0.1080(6) 0.9710(4) 0.1682(4) 0.0582(18) Uani 1 1 d . . .
H38 H 0.0787 1.023 0.1315 0.07 Uiso 1 1 calc R . .
C39 C 0.1717(5) 0.9683(4) 0.2224(4) 0.0576(18) Uani 1 1 d . . .
H39 H 0.1874 1.0179 0.223 0.069 Uiso 1 1 calc R . .
C40 C 0.2126(5) 0.8933(4) 0.2758(4) 0.0542(17) Uani 1 1 d . . .
H40 H 0.2562 0.8912 0.3138 0.065 Uiso 1 1 calc R . .
C41 C 0.1912(4) 0.8206(3) 0.2750(3) 0.0437(14) Uani 1 1 d . . .
H41 H 0.2208 0.7693 0.3123 0.052 Uiso 1 1 calc R . .
C42 C 0.8026(4) -0.0323(3) 0.2559(3) 0.0296(11) Uani 1 1 d . . .
C43 C 0.8904(4) -0.0273(3) 0.2914(3) 0.0320(11) Uani 1 1 d . . .
H43 H 0.9503 -0.0753 0.3029 0.038 Uiso 1 1 calc R . .
C44 C 0.9032(4) 0.0375(3) 0.3124(3) 0.0280(11) Uani 1 1 d . . .
C45 C 0.7997(4) -0.1184(3) 0.2596(3) 0.0408(13) Uani 1 1 d . . .
H45A H 0.7301 -0.1158 0.2395 0.061 Uiso 1 1 calc R . .
H45B H 0.8064 -0.1558 0.3105 0.061 Uiso 1 1 calc R . .
H45C H 0.8606 -0.1395 0.2312 0.061 Uiso 1 1 calc R . .
C46 C 0.9898(4) 0.0156(3) 0.3697(3) 0.0399(13) Uani 1 1 d . . .
H46A H 1.0314 0.0584 0.3555 0.06 Uiso 1 1 calc R . .
H46B H 1.0396 -0.0387 0.3737 0.06 Uiso 1 1 calc R . .
H46C H 0.9543 0.0127 0.4168 0.06 Uiso 1 1 calc R . .
C47 C 0.6259(4) 0.0223(3) 0.1973(3) 0.0263(11) Uani 1 1 d . . .
C48 C 0.5373(4) 0.0147(3) 0.2452(3) 0.0348(12) Uani 1 1 d . . .
C49 C 0.4451(5) 0.0008(4) 0.2218(3) 0.0466(14) Uani 1 1 d . . .
H49 H 0.3843 -0.0053 0.2537 0.056 Uiso 1 1 calc R . .
C50 C 0.4402(5) -0.0043(4) 0.1538(3) 0.0481(15) Uani 1 1 d . . .
H50 H 0.3769 -0.0144 0.1393 0.058 Uiso 1 1 calc R . .
C51 C 0.5272(5) 0.0053(3) 0.1070(3) 0.0425(14) Uani 1 1 d . . .
H51 H 0.5224 0.0031 0.0596 0.051 Uiso 1 1 calc R . .
C52 C 0.6224(4) 0.0182(3) 0.1270(3) 0.0364(13) Uani 1 1 d . . .
C53 C 0.5382(5) 0.0203(4) 0.3205(3) 0.0442(14) Uani 1 1 d . . .
H53 H 0.5951 0.0505 0.3204 0.053 Uiso 1 1 calc R . .
C54 C 0.5712(7) -0.0659(5) 0.3791(4) 0.088(3) Uani 1 1 d . . .
H54A H 0.5709 -0.0598 0.4269 0.132 Uiso 1 1 calc R . .
H54B H 0.6449 -0.0949 0.3687 0.132 Uiso 1 1 calc R . .
H54C H 0.519 -0.0984 0.3792 0.132 Uiso 1 1 calc R . .
C55 C 0.4299(5) 0.0686(4) 0.3425(3) 0.0554(16) Uani 1 1 d . . .
H55A H 0.4368 0.0697 0.3915 0.083 Uiso 1 1 calc R . .
H55B H 0.3718 0.0413 0.3422 0.083 Uiso 1 1 calc R . .
H55C H 0.4116 0.1259 0.3078 0.083 Uiso 1 1 calc R . .
C56 C 0.7191(5) 0.0210(5) 0.0756(4) 0.065(2) Uani 1 1 d . . .
H56 H 0.7808 0.0297 0.0981 0.078 Uiso 1 1 calc R . .
C57 C 0.7568(9) -0.0657(6) 0.0613(5) 0.129(4) Uani 1 1 d . . .
H57A H 0.7755 -0.1114 0.1078 0.193 Uiso 1 1 calc R . .
H57B H 0.821 -0.0654 0.0293 0.193 Uiso 1 1 calc R . .
H57C H 0.6969 -0.0734 0.038 0.193 Uiso 1 1 calc R . .
C58 C 0.6940(6) 0.0850(4) 0.0041(5) 0.086(3) Uani 1 1 d . . .
H58A H 0.7599 0.0833 -0.0263 0.129 Uiso 1 1 calc R . .
H58B H 0.6689 0.14 0.0095 0.129 Uiso 1 1 calc R . .
H58C H 0.6362 0.0746 -0.019 0.129 Uiso 1 1 calc R . .
C59 C 0.8516(4) 0.1764(3) 0.3180(2) 0.0240(10) Uani 1 1 d . . .
C60 C 0.7865(4) 0.1839(3) 0.3780(3) 0.0335(12) Uani 1 1 d . . .
C61 C 0.7879(5) 0.2486(4) 0.4030(3) 0.0441(14) Uani 1 1 d . . .
H61 H 0.7432 0.2551 0.4432 0.053 Uiso 1 1 calc R . .
C62 C 0.8529(5) 0.3031(4) 0.3704(3) 0.0455(15) Uani 1 1 d . . .
H62 H 0.852 0.3472 0.3877 0.055 Uiso 1 1 calc R . .
C63 C 0.9196(4) 0.2936(3) 0.3123(3) 0.0380(13) Uani 1 1 d . . .
H63 H 0.9647 0.3311 0.2905 0.046 Uiso 1 1 calc R . .
C64 C 0.9215(4) 0.2295(3) 0.2853(3) 0.0285(11) Uani 1 1 d . . .
C65 C 0.7148(5) 0.1251(4) 0.4172(3) 0.0511(16) Uani 1 1 d . . .
H65 H 0.7214 0.0838 0.3918 0.061 Uiso 1 1 calc R . .
C66 C 0.7550(7) 0.0769(5) 0.4967(4) 0.079(2) Uani 1 1 d . . .
H66A H 0.7088 0.0385 0.5217 0.118 Uiso 1 1 calc R . .
H66B H 0.7505 0.1165 0.5221 0.118 Uiso 1 1 calc R . .
H66C H 0.8312 0.0451 0.4966 0.118 Uiso 1 1 calc R . .
C67 C 0.5947(5) 0.1713(4) 0.4166(3) 0.0576(17) Uani 1 1 d . . .
H67A H 0.5509 0.1313 0.4419 0.086 Uiso 1 1 calc R . .
H67B H 0.5692 0.2005 0.3661 0.086 Uiso 1 1 calc R . .
H67C H 0.5867 0.212 0.4414 0.086 Uiso 1 1 calc R . .
C68 C 0.9974(4) 0.2208(3) 0.2228(3) 0.0367(12) Uani 1 1 d . . .
H68 H 0.984 0.1748 0.2089 0.044 Uiso 1 1 calc R . .
C69 C 1.1177(5) 0.1972(4) 0.2446(4) 0.0566(17) Uani 1 1 d . . .
H69A H 1.1642 0.1918 0.2029 0.085 Uiso 1 1 calc R . .
H69B H 1.1335 0.144 0.2851 0.085 Uiso 1 1 calc R . .
H69C H 1.1327 0.2408 0.2597 0.085 Uiso 1 1 calc R . .
C70 C 0.9720(6) 0.3004(4) 0.1565(3) 0.0657(19) Uani 1 1 d . . .
H70A H 1.0218 0.2933 0.1167 0.099 Uiso 1 1 calc R . .
H70B H 0.9819 0.3471 0.1692 0.099 Uiso 1 1 calc R . .
H70C H 0.8961 0.312 0.141 0.099 Uiso 1 1 calc R . .
C71 C 0.5012(4) 0.2446(3) 0.1214(3) 0.0248(10) Uani 1 1 d . . .
C72 C 0.4073(4) 0.2144(3) 0.1291(3) 0.0327(11) Uani 1 1 d . . .
H72 H 0.377 0.1935 0.1761 0.039 Uiso 1 1 calc R . .
C73 C 0.3581(4) 0.2148(4) 0.0685(3) 0.0436(14) Uani 1 1 d . . .
H73 H 0.2942 0.1943 0.0743 0.052 Uiso 1 1 calc R . .
C74 C 0.4012(5) 0.2450(3) -0.0004(3) 0.0433(14) Uani 1 1 d . . .
H74 H 0.3672 0.2451 -0.0418 0.052 Uiso 1 1 calc R . .
C75 C 0.4942(4) 0.2749(3) -0.0089(3) 0.0364(12) Uani 1 1 d . . .
H75 H 0.524 0.2956 -0.0561 0.044 Uiso 1 1 calc R . .
C76 C 0.5435(4) 0.2746(3) 0.0511(3) 0.0283(11) Uani 1 1 d . . .
H76 H 0.6074 0.2952 0.0448 0.034 Uiso 1 1 calc R . .
C77 C 0.5848(4) 0.3482(3) 0.1740(2) 0.0237(10) Uani 1 1 d . . .
C78 C 0.5231(4) 0.4157(3) 0.1202(2) 0.0254(10) Uani 1 1 d . . .
H78 H 0.4712 0.4069 0.0935 0.031 Uiso 1 1 calc R . .
C79 C 0.5354(4) 0.4955(3) 0.1046(3) 0.0283(11) Uani 1 1 d . . .
H79 H 0.4928 0.5406 0.067 0.034 Uiso 1 1 calc R . .
C80 C 0.6094(4) 0.5101(3) 0.1434(3) 0.0335(12) Uani 1 1 d . . .
H80 H 0.6175 0.5651 0.1327 0.04 Uiso 1 1 calc R . .
C81 C 0.6713(4) 0.4442(3) 0.1979(3) 0.0341(12) Uani 1 1 d . . .
H81 H 0.7225 0.4538 0.2247 0.041 Uiso 1 1 calc R . .
C82 C 0.6588(4) 0.3639(3) 0.2134(3) 0.0289(11) Uani 1 1 d . . .
H82 H 0.7011 0.319 0.2513 0.035 Uiso 1 1 calc R . .
C1S C 0.2234(4) 0.2447(3) 0.5030(3) 0.093(3) Uiso 1 1 d G . .
C2S C 0.2426(5) 0.2039(4) 0.4524(3) 0.123(4) Uiso 1 1 d GD . .
H2S H 0.3089 0.2015 0.4254 0.147 Uiso 1 1 calc R . .
C3S C 0.1646(6) 0.1665(4) 0.4413(4) 0.181(6) Uiso 1 1 d G . .
H3S H 0.1777 0.1386 0.4067 0.217 Uiso 1 1 calc R . .
C4S C 0.0675(5) 0.1700(4) 0.4809(4) 0.114(3) Uiso 1 1 d G . .
H4S H 0.0143 0.1444 0.4733 0.137 Uiso 1 1 calc R . .
C5S C 0.0484(4) 0.2108(4) 0.5315(4) 0.121(3) Uiso 1 1 d G . .
H5S H -0.018 0.2132 0.5586 0.145 Uiso 1 1 calc R . .
C6S C 0.1263(5) 0.2482(4) 0.5426(3) 0.123(4) Uiso 1 1 d GD . .
H6S H 0.1133 0.2761 0.5772 0.148 Uiso 1 1 calc R . .
C7S C 0.3211(6) 0.2810(5) 0.5002(5) 0.170(5) Uiso 1 1 d GD . .
H7S1 H 0.3105 0.3104 0.5354 0.256 Uiso 0.5 1 calc PR . .
H7S2 H 0.3277 0.3202 0.4511 0.256 Uiso 0.5 1 calc PR . .
H7S3 H 0.3881 0.2358 0.5125 0.256 Uiso 0.5 1 calc PR . .
H7S4 H 0.3737 0.2672 0.4639 0.256 Uiso 0.5 1 calc PR . .
H7S5 H 0.3565 0.2574 0.5482 0.256 Uiso 0.5 1 calc PR . .
H7S6 H 0.2961 0.3418 0.4868 0.256 Uiso 0.5 1 calc PR . .
 
loop_
    _atom_site_aniso_label
    _atom_site_aniso_U_11
    _atom_site_aniso_U_22
    _atom_site_aniso_U_33
    _atom_site_aniso_U_23
    _atom_site_aniso_U_13
    _atom_site_aniso_U_12
Sn1 0.01873(17) 0.02378(17) 0.02039(17) -0.00840(14) -0.00114(13) -0.00646(13)
Sn2 0.02466(18) 0.02362(17) 0.02177(18) -0.00793(14) -0.00011(14) -0.00515(14)
P1 0.0261(7) 0.0241(6) 0.0342(7) -0.0117(6) 0.0039(6) -0.0062(5)
P2 0.0246(6) 0.0213(6) 0.0247(6) -0.0070(5) -0.0004(5) -0.0043(5)
N1 0.0176(18) 0.0219(19) 0.0172(18) -0.0088(16) 0.0005(15) -0.0048(15)
N2 0.0197(19) 0.032(2) 0.022(2) -0.0145(18) -0.0018(16) -0.0079(17)
N3 0.028(2) 0.0169(19) 0.032(2) -0.0103(18) -0.0051(18) -0.0010(17)
N4 0.021(2) 0.025(2) 0.027(2) -0.0103(18) -0.0018(17) -0.0029(16)
C1 0.019(2) 0.024(2) 0.020(2) -0.009(2) 0.0020(19) -0.0036(19)
C2 0.021(2) 0.024(2) 0.023(2) -0.010(2) -0.0016(19) 0.0038(19)
C3 0.016(2) 0.034(3) 0.016(2) -0.009(2) 0.0016(18) -0.003(2)
C4 0.027(3) 0.022(2) 0.037(3) -0.010(2) -0.008(2) -0.001(2)
C5 0.029(3) 0.041(3) 0.040(3) -0.016(3) -0.014(2) 0.004(2)
C6 0.018(2) 0.017(2) 0.024(2) -0.0062(19) -0.0042(19) -0.0043(18)
C7 0.023(2) 0.019(2) 0.025(2) -0.007(2) 0.003(2) -0.0075(19)
C8 0.022(2) 0.036(3) 0.034(3) -0.014(2) 0.004(2) -0.012(2)
C9 0.022(3) 0.049(3) 0.046(3) -0.022(3) -0.006(2) -0.011(2)
C10 0.030(3) 0.048(3) 0.027(3) -0.018(2) -0.003(2) -0.012(2)
C11 0.022(2) 0.022(2) 0.024(2) -0.008(2) -0.0013(19) -0.0056(19)
C12 0.020(2) 0.029(2) 0.028(3) -0.009(2) 0.002(2) -0.009(2)
C13 0.048(3) 0.039(3) 0.028(3) -0.006(2) 0.001(3) -0.010(3)
C14 0.031(3) 0.054(3) 0.033(3) -0.020(3) 0.007(2) -0.006(3)
C15 0.021(2) 0.040(3) 0.022(2) -0.012(2) -0.003(2) -0.007(2)
C16 0.044(3) 0.052(4) 0.028(3) -0.005(3) 0.004(3) -0.011(3)
C17 0.034(3) 0.059(4) 0.045(3) -0.035(3) 0.001(3) -0.007(3)
C18 0.019(2) 0.041(3) 0.024(2) -0.018(2) -0.005(2) -0.004(2)
C19 0.027(3) 0.052(3) 0.024(3) -0.020(2) -0.004(2) -0.007(2)
C20 0.040(3) 0.066(4) 0.032(3) -0.033(3) 0.002(3) -0.008(3)
C21 0.043(3) 0.061(4) 0.050(4) -0.040(3) -0.002(3) -0.016(3)
C22 0.035(3) 0.046(3) 0.045(3) -0.026(3) -0.001(3) -0.013(3)
C23 0.021(2) 0.034(3) 0.032(3) -0.017(2) -0.007(2) -0.001(2)
C24 0.039(3) 0.065(4) 0.031(3) -0.026(3) 0.009(2) -0.023(3)
C25 0.052(4) 0.071(4) 0.037(3) -0.013(3) 0.007(3) -0.022(3)
C26 0.036(3) 0.093(5) 0.036(3) -0.030(3) 0.007(3) -0.023(3)
C27 0.024(3) 0.040(3) 0.039(3) -0.022(3) 0.003(2) -0.010(2)
C28 0.026(3) 0.083(5) 0.066(4) -0.035(4) 0.010(3) -0.018(3)
C29 0.063(4) 0.052(4) 0.044(3) -0.021(3) 0.012(3) -0.021(3)
C30 0.024(3) 0.022(2) 0.048(3) -0.013(2) -0.009(2) 0.004(2)
C31 0.044(4) 0.045(3) 0.068(4) 0.002(3) -0.026(3) -0.012(3)
C32 0.070(5) 0.081(6) 0.115(7) -0.009(5) -0.059(6) -0.021(5)
C33 0.084(6) 0.076(5) 0.084(6) -0.037(5) -0.056(5) 0.015(5)
C34 0.068(5) 0.058(4) 0.046(4) -0.019(3) -0.007(3) 0.017(4)
C35 0.038(3) 0.045(3) 0.035(3) -0.018(3) -0.001(3) 0.002(3)
C36 0.026(3) 0.028(3) 0.041(3) -0.017(2) 0.008(2) -0.005(2)
C37 0.063(4) 0.032(3) 0.044(3) -0.014(3) 0.008(3) -0.014(3)
C38 0.068(5) 0.032(3) 0.072(5) -0.016(3) 0.018(4) -0.015(3)
C39 0.049(4) 0.043(4) 0.097(5) -0.040(4) 0.018(4) -0.021(3)
C40 0.037(3) 0.048(4) 0.092(5) -0.044(4) -0.001(3) -0.007(3)
C41 0.027(3) 0.038(3) 0.073(4) -0.032(3) 0.002(3) -0.003(2)
C42 0.027(3) 0.023(2) 0.038(3) -0.014(2) -0.004(2) 0.001(2)
C43 0.029(3) 0.023(2) 0.040(3) -0.012(2) -0.005(2) 0.002(2)
C44 0.024(2) 0.027(3) 0.030(3) -0.009(2) -0.001(2) -0.001(2)
C45 0.036(3) 0.024(3) 0.063(4) -0.016(3) -0.013(3) -0.001(2)
C46 0.037(3) 0.032(3) 0.046(3) -0.011(3) -0.019(3) 0.002(2)
C47 0.030(3) 0.014(2) 0.036(3) -0.009(2) -0.005(2) -0.0043(19)
C48 0.040(3) 0.025(3) 0.038(3) -0.002(2) -0.005(2) -0.016(2)
C49 0.047(4) 0.051(4) 0.048(4) -0.011(3) 0.002(3) -0.030(3)
C50 0.046(4) 0.054(4) 0.055(4) -0.018(3) -0.008(3) -0.027(3)
C51 0.044(3) 0.040(3) 0.052(4) -0.026(3) -0.012(3) -0.007(3)
C52 0.030(3) 0.032(3) 0.051(3) -0.021(3) -0.009(3) -0.002(2)
C53 0.045(3) 0.058(4) 0.032(3) -0.007(3) 0.004(3) -0.027(3)
C54 0.092(6) 0.085(6) 0.041(4) 0.006(4) 0.003(4) 0.016(5)
C55 0.076(5) 0.051(4) 0.039(3) -0.010(3) 0.006(3) -0.023(3)
C56 0.041(4) 0.115(6) 0.068(5) -0.070(5) 0.011(3) -0.018(4)
C57 0.154(10) 0.087(7) 0.106(8) -0.037(6) 0.020(7) 0.036(6)
C58 0.076(5) 0.045(4) 0.104(7) -0.004(4) 0.050(5) -0.006(4)
C59 0.026(2) 0.021(2) 0.022(2) -0.006(2) -0.012(2) 0.000(2)
C60 0.040(3) 0.036(3) 0.025(3) -0.011(2) 0.001(2) -0.010(2)
C61 0.052(4) 0.052(4) 0.037(3) -0.026(3) 0.000(3) -0.012(3)
C62 0.052(4) 0.043(3) 0.052(4) -0.034(3) -0.011(3) -0.002(3)
C63 0.042(3) 0.033(3) 0.046(3) -0.018(3) -0.009(3) -0.011(2)
C64 0.026(3) 0.028(3) 0.031(3) -0.010(2) -0.010(2) -0.001(2)
C65 0.068(4) 0.055(4) 0.039(3) -0.025(3) 0.021(3) -0.024(3)
C66 0.086(6) 0.074(5) 0.056(5) -0.001(4) 0.017(4) -0.018(4)
C67 0.057(4) 0.085(5) 0.040(3) -0.026(4) 0.008(3) -0.030(4)
C68 0.036(3) 0.041(3) 0.044(3) -0.024(3) 0.006(3) -0.017(2)
C69 0.035(3) 0.059(4) 0.084(5) -0.033(4) 0.008(3) -0.017(3)
C70 0.089(5) 0.060(4) 0.040(4) -0.008(3) 0.013(4) -0.022(4)
C71 0.025(2) 0.017(2) 0.032(3) -0.009(2) -0.002(2) -0.0026(19)
C72 0.032(3) 0.031(3) 0.035(3) -0.008(2) -0.002(2) -0.010(2)
C73 0.033(3) 0.051(3) 0.052(4) -0.019(3) -0.006(3) -0.015(3)
C74 0.044(3) 0.051(3) 0.040(3) -0.021(3) -0.014(3) -0.008(3)
C75 0.044(3) 0.033(3) 0.031(3) -0.011(2) -0.001(2) -0.005(2)
C76 0.030(3) 0.026(2) 0.030(3) -0.011(2) 0.001(2) -0.009(2)
C77 0.022(2) 0.024(2) 0.022(2) -0.008(2) 0.0029(19) -0.0020(19)
C78 0.025(2) 0.026(2) 0.027(3) -0.013(2) -0.001(2) -0.003(2)
C79 0.033(3) 0.021(2) 0.024(2) -0.002(2) 0.001(2) -0.003(2)
C80 0.037(3) 0.023(2) 0.042(3) -0.013(2) 0.008(2) -0.010(2)
C81 0.029(3) 0.036(3) 0.042(3) -0.018(3) 0.000(2) -0.010(2)
C82 0.027(3) 0.028(2) 0.030(3) -0.008(2) -0.005(2) -0.006(2)
 
 
#----------------------------------------------------------------------------#
#                   MOLECULAR GEOMETRY                                       #
#----------------------------------------------------------------------------#
 
_geom_special_details
;
 All esds (except the esd in the dihedral angle between two l.s. planes)
 are estimated using the full covariance matrix.  The cell esds are taken
 into account individually in the estimation of esds in distances, angles
 and torsion angles; correlations between esds in cell parameters are only
 used when they are defined by crystal symmetry.  An approximate (isotropic)
 treatment of cell esds is used for estimating esds involving l.s. planes.
;
loop_
    _geom_bond_atom_site_label_1
    _geom_bond_atom_site_label_2
    _geom_bond_distance
    _geom_bond_site_symmetry_2
    _geom_bond_publ_flag
Sn1 N1 2.211(3) . ?
Sn1 N2 2.220(3) . ?
Sn1 P1 2.6612(12) . ?
Sn2 N3 2.205(4) . ?
Sn2 N4 2.224(4) . ?
Sn2 P2 2.6417(12) . ?
P1 C36 1.836(5) . ?
P1 C30 1.839(5) . ?
P2 C71 1.844(5) . ?
P2 C77 1.844(5) . ?
N1 C1 1.332(5) . ?
N1 C6 1.444(5) . ?
N2 C3 1.337(6) . ?
N2 C18 1.438(5) . ?
N3 C42 1.338(6) . ?
N3 C47 1.446(6) . ?
N4 C44 1.329(6) . ?
N4 C59 1.438(5) . ?
C1 C2 1.398(6) . ?
C1 C4 1.517(6) . ?
C2 C3 1.395(6) . ?
C2 H2 0.95 . ?
C3 C5 1.516(6) . ?
C4 H4A 0.98 . ?
C4 H4B 0.98 . ?
C4 H4C 0.98 . ?
C5 H5A 0.98 . ?
C5 H5B 0.98 . ?
C5 H5C 0.98 . ?
C6 C7 1.402(6) . ?
C6 C11 1.408(6) . ?
C7 C8 1.395(6) . ?
C7 C12 1.526(6) . ?
C8 C9 1.385(7) . ?
C8 H8 0.95 . ?
C9 C10 1.381(7) . ?
C9 H9 0.95 . ?
C10 C11 1.398(6) . ?
C10 H10 0.95 . ?
C11 C15 1.511(6) . ?
C12 C14 1.525(6) . ?
C12 C13 1.534(7) . ?
C12 H12 1 . ?
C13 H13A 0.98 . ?
C13 H13B 0.98 . ?
C13 H13C 0.98 . ?
C14 H14A 0.98 . ?
C14 H14B 0.98 . ?
C14 H14C 0.98 . ?
C15 C16 1.535(7) . ?
C15 C17 1.537(6) . ?
C15 H15 1 . ?
C16 H16A 0.98 . ?
C16 H16B 0.98 . ?
C16 H16C 0.98 . ?
C17 H17A 0.98 . ?
C17 H17B 0.98 . ?
C17 H17C 0.98 . ?
C18 C23 1.402(7) . ?
C18 C19 1.408(6) . ?
C19 C20 1.394(7) . ?
C19 C24 1.524(7) . ?
C20 C21 1.384(8) . ?
C20 H20 0.95 . ?
C21 C22 1.372(7) . ?
C21 H21 0.95 . ?
C22 C23 1.389(6) . ?
C22 H22 0.95 . ?
C23 C27 1.523(7) . ?
C24 C26 1.531(8) . ?
C24 C25 1.539(8) . ?
C24 H24 1 . ?
C25 H25A 0.98 . ?
C25 H25B 0.98 . ?
C25 H25C 0.98 . ?
C26 H26A 0.98 . ?
C26 H26B 0.98 . ?
C26 H26C 0.98 . ?
C27 C28 1.532(7) . ?
C27 C29 1.535(8) . ?
C27 H27 1 . ?
C28 H28A 0.98 . ?
C28 H28B 0.98 . ?
C28 H28C 0.98 . ?
C29 H29A 0.98 . ?
C29 H29B 0.98 . ?
C29 H29C 0.98 . ?
C30 C31 1.380(7) . ?
C30 C35 1.398(7) . ?
C31 C32 1.383(10) . ?
C31 H31 0.95 . ?
C32 C33 1.384(12) . ?
C32 H32 0.95 . ?
C33 C34 1.356(10) . ?
C33 H33 0.95 . ?
C34 C35 1.382(8) . ?
C34 H34 0.95 . ?
C35 H35 0.95 . ?
C36 C37 1.397(7) . ?
C36 C41 1.408(7) . ?
C37 C38 1.389(8) . ?
C37 H37 0.95 . ?
C38 C39 1.370(9) . ?
C38 H38 0.95 . ?
C39 C40 1.372(9) . ?
C39 H39 0.95 . ?
C40 C41 1.384(7) . ?
C40 H40 0.95 . ?
C41 H41 0.95 . ?
C42 C43 1.398(6) . ?
C42 C45 1.506(6) . ?
C43 C44 1.394(6) . ?
C43 H43 0.95 . ?
C44 C46 1.518(6) . ?
C45 H45A 0.98 . ?
C45 H45B 0.98 . ?
C45 H45C 0.98 . ?
C46 H46A 0.98 . ?
C46 H46B 0.98 . ?
C46 H46C 0.98 . ?
C47 C48 1.398(7) . ?
C47 C52 1.408(7) . ?
C48 C49 1.397(7) . ?
C48 C53 1.515(7) . ?
C49 C50 1.375(8) . ?
C49 H49 0.95 . ?
C50 C51 1.374(8) . ?
C50 H50 0.95 . ?
C51 C52 1.394(7) . ?
C51 H51 0.95 . ?
C52 C56 1.512(8) . ?
C53 C55 1.526(8) . ?
C53 C54 1.528(9) . ?
C53 H53 1 . ?
C54 H54A 0.98 . ?
C54 H54B 0.98 . ?
C54 H54C 0.98 . ?
C55 H55A 0.98 . ?
C55 H55B 0.98 . ?
C55 H55C 0.98 . ?
C56 C58 1.456(10) . ?
C56 C57 1.595(10) . ?
C56 H56 1 . ?
C57 H57A 0.98 . ?
C57 H57B 0.98 . ?
C57 H57C 0.98 . ?
C58 H58A 0.98 . ?
C58 H58B 0.98 . ?
C58 H58C 0.98 . ?
C59 C60 1.398(7) . ?
C59 C64 1.406(7) . ?
C60 C61 1.398(7) . ?
C60 C65 1.515(8) . ?
C61 C62 1.375(8) . ?
C61 H61 0.95 . ?
C62 C63 1.386(8) . ?
C62 H62 0.95 . ?
C63 C64 1.403(6) . ?
C63 H63 0.95 . ?
C64 C68 1.512(7) . ?
C65 C67 1.523(9) . ?
C65 C66 1.548(9) . ?
C65 H65 1 . ?
C66 H66A 0.98 . ?
C66 H66B 0.98 . ?
C66 H66C 0.98 . ?
C67 H67A 0.98 . ?
C67 H67B 0.98 . ?
C67 H67C 0.98 . ?
C68 C70 1.524(8) . ?
C68 C69 1.526(7) . ?
C68 H68 1 . ?
C69 H69A 0.98 . ?
C69 H69B 0.98 . ?
C69 H69C 0.98 . ?
C70 H70A 0.98 . ?
C70 H70B 0.98 . ?
C70 H70C 0.98 . ?
C71 C72 1.399(6) . ?
C71 C76 1.402(7) . ?
C72 C73 1.387(7) . ?
C72 H72 0.95 . ?
C73 C74 1.385(8) . ?
C73 H73 0.95 . ?
C74 C75 1.383(7) . ?
C74 H74 0.95 . ?
C75 C76 1.378(7) . ?
C75 H75 0.95 . ?
C76 H76 0.95 . ?
C77 C78 1.386(6) . ?
C77 C82 1.403(6) . ?
C78 C79 1.379(6) . ?
C78 H78 0.95 . ?
C79 C80 1.383(7) . ?
C79 H79 0.95 . ?
C80 C81 1.382(7) . ?
C80 H80 0.95 . ?
C81 C82 1.390(7) . ?
C81 H81 0.95 . ?
C82 H82 0.95 . ?
C1S C2S 1.39 . ?
C1S C6S 1.39 . ?
C1S C7S 1.5217 . ?
C2S C3S 1.39 . ?
C2S H2S 0.95 . ?
C3S C4S 1.39 . ?
C3S H3S 0.95 . ?
C4S C5S 1.39 . ?
C4S H4S 0.95 . ?
C5S C6S 1.39 . ?
C5S H5S 0.95 . ?
C6S H6S 0.95 . ?
C7S H7S1 0.98 . ?
C7S H7S2 0.98 . ?
C7S H7S3 0.98 . ?
C7S H7S4 0.98 . ?
C7S H7S5 0.98 . ?
C7S H7S6 0.98 . ?
 
loop_
    _geom_angle_atom_site_label_1
    _geom_angle_atom_site_label_2
    _geom_angle_atom_site_label_3
    _geom_angle
    _geom_angle_site_symmetry_1
    _geom_angle_site_symmetry_3
    _geom_angle_publ_flag
N1 Sn1 N2 83.76(13) . . ?
N1 Sn1 P1 95.78(9) . . ?
N2 Sn1 P1 104.53(10) . . ?
N3 Sn2 N4 83.96(13) . . ?
N3 Sn2 P2 96.11(10) . . ?
N4 Sn2 P2 102.83(10) . . ?
C36 P1 C30 102.5(2) . . ?
C36 P1 Sn1 102.07(15) . . ?
C30 P1 Sn1 91.21(15) . . ?
C71 P2 C77 100.6(2) . . ?
C71 P2 Sn2 94.49(14) . . ?
C77 P2 Sn2 99.91(14) . . ?
C1 N1 C6 120.1(3) . . ?
C1 N1 Sn1 119.1(3) . . ?
C6 N1 Sn1 118.8(3) . . ?
C3 N2 C18 119.6(4) . . ?
C3 N2 Sn1 117.9(3) . . ?
C18 N2 Sn1 121.5(3) . . ?
C42 N3 C47 119.8(4) . . ?
C42 N3 Sn2 118.6(3) . . ?
C47 N3 Sn2 120.0(3) . . ?
C44 N4 C59 120.8(4) . . ?
C44 N4 Sn2 118.2(3) . . ?
C59 N4 Sn2 119.4(3) . . ?
N1 C1 C2 124.0(4) . . ?
N1 C1 C4 119.9(4) . . ?
C2 C1 C4 116.1(4) . . ?
C3 C2 C1 129.0(4) . . ?
C3 C2 H2 115.5 . . ?
C1 C2 H2 115.5 . . ?
N2 C3 C2 124.4(4) . . ?
N2 C3 C5 119.4(4) . . ?
C2 C3 C5 116.1(4) . . ?
C1 C4 H4A 109.5 . . ?
C1 C4 H4B 109.5 . . ?
H4A C4 H4B 109.5 . . ?
C1 C4 H4C 109.5 . . ?
H4A C4 H4C 109.5 . . ?
H4B C4 H4C 109.5 . . ?
C3 C5 H5A 109.5 . . ?
C3 C5 H5B 109.5 . . ?
H5A C5 H5B 109.5 . . ?
C3 C5 H5C 109.5 . . ?
H5A C5 H5C 109.5 . . ?
H5B C5 H5C 109.5 . . ?
C7 C6 C11 122.0(4) . . ?
C7 C6 N1 118.7(4) . . ?
C11 C6 N1 119.3(4) . . ?
C8 C7 C6 117.9(4) . . ?
C8 C7 C12 120.6(4) . . ?
C6 C7 C12 121.4(4) . . ?
C9 C8 C7 121.0(4) . . ?
C9 C8 H8 119.5 . . ?
C7 C8 H8 119.5 . . ?
C10 C9 C8 120.3(4) . . ?
C10 C9 H9 119.9 . . ?
C8 C9 H9 119.9 . . ?
C9 C10 C11 121.1(4) . . ?
C9 C10 H10 119.4 . . ?
C11 C10 H10 119.4 . . ?
C10 C11 C6 117.6(4) . . ?
C10 C11 C15 118.9(4) . . ?
C6 C11 C15 123.5(4) . . ?
C14 C12 C7 113.1(4) . . ?
C14 C12 C13 109.6(4) . . ?
C7 C12 C13 112.2(4) . . ?
C14 C12 H12 107.2 . . ?
C7 C12 H12 107.2 . . ?
C13 C12 H12 107.2 . . ?
C12 C13 H13A 109.5 . . ?
C12 C13 H13B 109.5 . . ?
H13A C13 H13B 109.5 . . ?
C12 C13 H13C 109.5 . . ?
H13A C13 H13C 109.5 . . ?
H13B C13 H13C 109.5 . . ?
C12 C14 H14A 109.5 . . ?
C12 C14 H14B 109.5 . . ?
H14A C14 H14B 109.5 . . ?
C12 C14 H14C 109.5 . . ?
H14A C14 H14C 109.5 . . ?
H14B C14 H14C 109.5 . . ?
C11 C15 C16 111.6(4) . . ?
C11 C15 C17 112.4(4) . . ?
C16 C15 C17 109.6(4) . . ?
C11 C15 H15 107.7 . . ?
C16 C15 H15 107.7 . . ?
C17 C15 H15 107.7 . . ?
C15 C16 H16A 109.5 . . ?
C15 C16 H16B 109.5 . . ?
H16A C16 H16B 109.5 . . ?
C15 C16 H16C 109.5 . . ?
H16A C16 H16C 109.5 . . ?
H16B C16 H16C 109.5 . . ?
C15 C17 H17A 109.5 . . ?
C15 C17 H17B 109.5 . . ?
H17A C17 H17B 109.5 . . ?
C15 C17 H17C 109.5 . . ?
H17A C17 H17C 109.5 . . ?
H17B C17 H17C 109.5 . . ?
C23 C18 C19 120.8(4) . . ?
C23 C18 N2 120.5(4) . . ?
C19 C18 N2 118.7(4) . . ?
C20 C19 C18 118.2(5) . . ?
C20 C19 C24 118.6(5) . . ?
C18 C19 C24 123.2(4) . . ?
C21 C20 C19 121.4(5) . . ?
C21 C20 H20 119.3 . . ?
C19 C20 H20 119.3 . . ?
C22 C21 C20 119.4(5) . . ?
C22 C21 H21 120.3 . . ?
C20 C21 H21 120.3 . . ?
C21 C22 C23 121.8(5) . . ?
C21 C22 H22 119.1 . . ?
C23 C22 H22 119.1 . . ?
C22 C23 C18 118.4(5) . . ?
C22 C23 C27 119.0(5) . . ?
C18 C23 C27 122.6(4) . . ?
C19 C24 C26 110.9(5) . . ?
C19 C24 C25 111.9(4) . . ?
C26 C24 C25 109.3(5) . . ?
C19 C24 H24 108.2 . . ?
C26 C24 H24 108.2 . . ?
C25 C24 H24 108.2 . . ?
C24 C25 H25A 109.5 . . ?
C24 C25 H25B 109.5 . . ?
H25A C25 H25B 109.5 . . ?
C24 C25 H25C 109.5 . . ?
H25A C25 H25C 109.5 . . ?
H25B C25 H25C 109.5 . . ?
C24 C26 H26A 109.5 . . ?
C24 C26 H26B 109.5 . . ?
H26A C26 H26B 109.5 . . ?
C24 C26 H26C 109.5 . . ?
H26A C26 H26C 109.5 . . ?
H26B C26 H26C 109.5 . . ?
C23 C27 C28 111.1(4) . . ?
C23 C27 C29 110.7(4) . . ?
C28 C27 C29 111.2(5) . . ?
C23 C27 H27 107.9 . . ?
C28 C27 H27 107.9 . . ?
C29 C27 H27 107.9 . . ?
C27 C28 H28A 109.5 . . ?
C27 C28 H28B 109.5 . . ?
H28A C28 H28B 109.5 . . ?
C27 C28 H28C 109.5 . . ?
H28A C28 H28C 109.5 . . ?
H28B C28 H28C 109.5 . . ?
C27 C29 H29A 109.5 . . ?
C27 C29 H29B 109.5 . . ?
H29A C29 H29B 109.5 . . ?
C27 C29 H29C 109.5 . . ?
H29A C29 H29C 109.5 . . ?
H29B C29 H29C 109.5 . . ?
C31 C30 C35 116.7(5) . . ?
C31 C30 P1 118.9(4) . . ?
C35 C30 P1 124.3(4) . . ?
C30 C31 C32 122.0(7) . . ?
C30 C31 H31 119 . . ?
C32 C31 H31 119 . . ?
C31 C32 C33 119.8(7) . . ?
C31 C32 H32 120.1 . . ?
C33 C32 H32 120.1 . . ?
C34 C33 C32 119.4(7) . . ?
C34 C33 H33 120.3 . . ?
C32 C33 H33 120.3 . . ?
C33 C34 C35 120.8(7) . . ?
C33 C34 H34 119.6 . . ?
C35 C34 H34 119.6 . . ?
C34 C35 C30 121.3(6) . . ?
C34 C35 H35 119.4 . . ?
C30 C35 H35 119.4 . . ?
C37 C36 C41 116.8(5) . . ?
C37 C36 P1 124.7(4) . . ?
C41 C36 P1 118.2(4) . . ?
C38 C37 C36 121.1(6) . . ?
C38 C37 H37 119.5 . . ?
C36 C37 H37 119.5 . . ?
C39 C38 C37 120.9(6) . . ?
C39 C38 H38 119.6 . . ?
C37 C38 H38 119.6 . . ?
C38 C39 C40 119.3(5) . . ?
C38 C39 H39 120.3 . . ?
C40 C39 H39 120.3 . . ?
C39 C40 C41 120.8(6) . . ?
C39 C40 H40 119.6 . . ?
C41 C40 H40 119.6 . . ?
C40 C41 C36 121.1(6) . . ?
C40 C41 H41 119.5 . . ?
C36 C41 H41 119.5 . . ?
N3 C42 C43 123.3(4) . . ?
N3 C42 C45 120.4(4) . . ?
C43 C42 C45 116.2(4) . . ?
C44 C43 C42 129.7(4) . . ?
C44 C43 H43 115.1 . . ?
C42 C43 H43 115.1 . . ?
N4 C44 C43 124.2(4) . . ?
N4 C44 C46 118.8(4) . . ?
C43 C44 C46 116.9(4) . . ?
C42 C45 H45A 109.5 . . ?
C42 C45 H45B 109.5 . . ?
H45A C45 H45B 109.5 . . ?
C42 C45 H45C 109.5 . . ?
H45A C45 H45C 109.5 . . ?
H45B C45 H45C 109.5 . . ?
C44 C46 H46A 109.5 . . ?
C44 C46 H46B 109.5 . . ?
H46A C46 H46B 109.5 . . ?
C44 C46 H46C 109.5 . . ?
H46A C46 H46C 109.5 . . ?
H46B C46 H46C 109.5 . . ?
C48 C47 C52 121.7(4) . . ?
C48 C47 N3 118.2(4) . . ?
C52 C47 N3 120.1(4) . . ?
C49 C48 C47 117.7(5) . . ?
C49 C48 C53 119.6(5) . . ?
C47 C48 C53 122.7(4) . . ?
C50 C49 C48 121.7(6) . . ?
C50 C49 H49 119.1 . . ?
C48 C49 H49 119.1 . . ?
C51 C50 C49 119.6(5) . . ?
C51 C50 H50 120.2 . . ?
C49 C50 H50 120.2 . . ?
C50 C51 C52 121.7(5) . . ?
C50 C51 H51 119.1 . . ?
C52 C51 H51 119.1 . . ?
C51 C52 C47 117.5(5) . . ?
C51 C52 C56 119.3(5) . . ?
C47 C52 C56 123.0(5) . . ?
C48 C53 C55 114.1(5) . . ?
C48 C53 C54 111.9(5) . . ?
C55 C53 C54 108.8(5) . . ?
C48 C53 H53 107.2 . . ?
C55 C53 H53 107.2 . . ?
C54 C53 H53 107.2 . . ?
C53 C54 H54A 109.5 . . ?
C53 C54 H54B 109.5 . . ?
H54A C54 H54B 109.5 . . ?
C53 C54 H54C 109.5 . . ?
H54A C54 H54C 109.5 . . ?
H54B C54 H54C 109.5 . . ?
C53 C55 H55A 109.5 . . ?
C53 C55 H55B 109.5 . . ?
H55A C55 H55B 109.5 . . ?
C53 C55 H55C 109.5 . . ?
H55A C55 H55C 109.5 . . ?
H55B C55 H55C 109.5 . . ?
C58 C56 C52 113.7(6) . . ?
C58 C56 C57 105.7(6) . . ?
C52 C56 C57 108.6(6) . . ?
C58 C56 H56 109.5 . . ?
C52 C56 H56 109.5 . . ?
C57 C56 H56 109.5 . . ?
C56 C57 H57A 109.5 . . ?
C56 C57 H57B 109.5 . . ?
H57A C57 H57B 109.5 . . ?
C56 C57 H57C 109.5 . . ?
H57A C57 H57C 109.5 . . ?
H57B C57 H57C 109.5 . . ?
C56 C58 H58A 109.5 . . ?
C56 C58 H58B 109.5 . . ?
H58A C58 H58B 109.5 . . ?
C56 C58 H58C 109.5 . . ?
H58A C58 H58C 109.5 . . ?
H58B C58 H58C 109.5 . . ?
C60 C59 C64 121.5(4) . . ?
C60 C59 N4 119.1(4) . . ?
C64 C59 N4 119.3(4) . . ?
C59 C60 C61 118.3(5) . . ?
C59 C60 C65 123.1(4) . . ?
C61 C60 C65 118.5(5) . . ?
C62 C61 C60 121.2(5) . . ?
C62 C61 H61 119.4 . . ?
C60 C61 H61 119.4 . . ?
C61 C62 C63 119.9(5) . . ?
C61 C62 H62 120 . . ?
C63 C62 H62 120 . . ?
C62 C63 C64 121.1(5) . . ?
C62 C63 H63 119.4 . . ?
C64 C63 H63 119.4 . . ?
C63 C64 C59 117.8(5) . . ?
C63 C64 C68 119.0(5) . . ?
C59 C64 C68 123.2(4) . . ?
C60 C65 C67 111.8(5) . . ?
C60 C65 C66 109.8(5) . . ?
C67 C65 C66 109.9(5) . . ?
C60 C65 H65 108.4 . . ?
C67 C65 H65 108.4 . . ?
C66 C65 H65 108.4 . . ?
C65 C66 H66A 109.5 . . ?
C65 C66 H66B 109.5 . . ?
H66A C66 H66B 109.5 . . ?
C65 C66 H66C 109.5 . . ?
H66A C66 H66C 109.5 . . ?
H66B C66 H66C 109.5 . . ?
C65 C67 H67A 109.5 . . ?
C65 C67 H67B 109.5 . . ?
H67A C67 H67B 109.5 . . ?
C65 C67 H67C 109.5 . . ?
H67A C67 H67C 109.5 . . ?
H67B C67 H67C 109.5 . . ?
C64 C68 C70 110.9(5) . . ?
C64 C68 C69 111.9(4) . . ?
C70 C68 C69 110.7(5) . . ?
C64 C68 H68 107.7 . . ?
C70 C68 H68 107.7 . . ?
C69 C68 H68 107.7 . . ?
C68 C69 H69A 109.5 . . ?
C68 C69 H69B 109.5 . . ?
H69A C69 H69B 109.5 . . ?
C68 C69 H69C 109.5 . . ?
H69A C69 H69C 109.5 . . ?
H69B C69 H69C 109.5 . . ?
C68 C70 H70A 109.5 . . ?
C68 C70 H70B 109.5 . . ?
H70A C70 H70B 109.5 . . ?
C68 C70 H70C 109.5 . . ?
H70A C70 H70C 109.5 . . ?
H70B C70 H70C 109.5 . . ?
C72 C71 C76 118.1(4) . . ?
C72 C71 P2 118.1(4) . . ?
C76 C71 P2 123.8(3) . . ?
C73 C72 C71 120.4(5) . . ?
C73 C72 H72 119.8 . . ?
C71 C72 H72 119.8 . . ?
C74 C73 C72 120.5(5) . . ?
C74 C73 H73 119.7 . . ?
C72 C73 H73 119.7 . . ?
C75 C74 C73 119.8(5) . . ?
C75 C74 H74 120.1 . . ?
C73 C74 H74 120.1 . . ?
C76 C75 C74 120.0(5) . . ?
C76 C75 H75 120 . . ?
C74 C75 H75 120 . . ?
C75 C76 C71 121.2(5) . . ?
C75 C76 H76 119.4 . . ?
C71 C76 H76 119.4 . . ?
C78 C77 C82 117.5(4) . . ?
C78 C77 P2 123.7(3) . . ?
C82 C77 P2 118.3(3) . . ?
C79 C78 C77 121.6(4) . . ?
C79 C78 H78 119.2 . . ?
C77 C78 H78 119.2 . . ?
C78 C79 C80 120.4(4) . . ?
C78 C79 H79 119.8 . . ?
C80 C79 H79 119.8 . . ?
C81 C80 C79 119.5(4) . . ?
C81 C80 H80 120.2 . . ?
C79 C80 H80 120.2 . . ?
C80 C81 C82 119.9(5) . . ?
C80 C81 H81 120 . . ?
C82 C81 H81 120 . . ?
C81 C82 C77 121.1(4) . . ?
C81 C82 H82 119.5 . . ?
C77 C82 H82 119.5 . . ?
C2S C1S C6S 120 . . ?
C2S C1S C7S 107.1 . . ?
C6S C1S C7S 132.8 . . ?
C3S C2S C1S 120 . . ?
C3S C2S H2S 120 . . ?
C1S C2S H2S 120 . . ?
C2S C3S C4S 120 . . ?
C2S C3S H3S 120 . . ?
C4S C3S H3S 120 . . ?
C5S C4S C3S 120 . . ?
C5S C4S H4S 120 . . ?
C3S C4S H4S 120 . . ?
C4S C5S C6S 120 . . ?
C4S C5S H5S 120 . . ?
C6S C5S H5S 120 . . ?
C5S C6S C1S 120 . . ?
C5S C6S H6S 120 . . ?
C1S C6S H6S 120 . . ?
C1S C7S H7S1 109.5 . . ?
C1S C7S H7S2 109.5 . . ?
H7S1 C7S H7S2 109.5 . . ?
C1S C7S H7S3 109.5 . . ?
H7S1 C7S H7S3 109.5 . . ?
H7S2 C7S H7S3 109.5 . . ?
C1S C7S H7S4 109.5 . . ?
H7S1 C7S H7S4 141.1 . . ?
H7S2 C7S H7S4 56.3 . . ?
H7S3 C7S H7S4 56.3 . . ?
C1S C7S H7S5 109.5 . . ?
H7S1 C7S H7S5 56.3 . . ?
H7S2 C7S H7S5 141.1 . . ?
H7S3 C7S H7S5 56.3 . . ?
H7S4 C7S H7S5 109.5 . . ?
C1S C7S H7S6 109.5 . . ?
H7S1 C7S H7S6 56.3 . . ?
H7S2 C7S H7S6 56.3 . . ?
H7S3 C7S H7S6 141.1 . . ?
H7S4 C7S H7S6 109.5 . . ?
H7S5 C7S H7S6 109.5 . . ?
 
#===END

data_(2b)-dec409
 
_audit_creation_date            2009-12-09T16:42:09-00:00
_audit_creation_method         'WinGX routine CIF_UPDATE'
_audit_conform_dict_name        cif_core.dic
_audit_conform_dict_version     2.2
_audit_conform_dict_location    ftp://ftp.iucr.org/pub/cif_core.dic
_publ_requested_category        FM
 
#----------------------------------------------------------------------------#
#                   CHEMICAL INFORMATION                                     #
#----------------------------------------------------------------------------#
 
_chemical_name_systematic
;
 ?
;
_chemical_formula_moiety                'C41 H63 N2 P Sn'
_chemical_formula_sum                   'C41 H63 N2 P Sn'
_chemical_formula_weight                733.59
_chemical_compound_source               'synthesis as described'
 
#----------------------------------------------------------------------------#
#                   UNIT CELL INFORMATION                                    #
#----------------------------------------------------------------------------#
 
_symmetry_cell_setting                  monoclinic
_symmetry_space_group_name_H-M          'P 21/c'
_symmetry_space_group_name_Hall         '-P 2ybc'
_symmetry_Int_Tables_number             14
loop_
    _symmetry_equiv_pos_as_xyz
'x, y, z'
'-x, y+1/2, -z+1/2'
'-x, -y, -z'
'x, -y-1/2, z-1/2'
 
_cell_length_a                          9.9722(1)
_cell_length_b                          23.7044(4)
_cell_length_c                          17.4243(3)
_cell_angle_alpha                       90
_cell_angle_beta                        109.003(1)
_cell_angle_gamma                       90
_cell_volume                            3894.37(10)
_cell_formula_units_Z                   4
_cell_measurement_temperature           173(2)
_cell_measurement_reflns_used           38781
_cell_measurement_theta_min             3.395
_cell_measurement_theta_max             27.103
_cell_measurement_wavelength            0.71073
 
#----------------------------------------------------------------------------#
#                   CRYSTAL INFORMATION                                      #
#----------------------------------------------------------------------------#
 
_exptl_crystal_description              Blade
_exptl_crystal_colour                   'Dark red'
_exptl_crystal_size_max                 0.17
_exptl_crystal_size_mid                 0.11
_exptl_crystal_size_min                 0.07
_exptl_crystal_density_diffrn           1.251
_exptl_crystal_density_method           'not measured'
_exptl_crystal_F_000                    1552
_exptl_special_details
;
 ?
;
 
#----------------------------------------------------------------------------#
#                   ABSORPTION CORRECTION                                    #
#----------------------------------------------------------------------------#
 
_exptl_absorpt_coefficient_mu           0.726
_exptl_absorpt_correction_type          multi-scan
_exptl_absorpt_process_details
;
        [c.f. r.h. blessing, acta cryst. (1995), a51, 33-38]
;
_exptl_absorpt_correction_T_min         0.858
_exptl_absorpt_correction_T_max         0.9735
 
#----------------------------------------------------------------------------#
#                   DATA COLLECTION                                          #
#----------------------------------------------------------------------------#
 
_diffrn_source                          'Enraf Nonius FR590'
_diffrn_ambient_temperature             173(2)
_diffrn_radiation_wavelength            0.71073
_diffrn_radiation_type                  MoK\a
_diffrn_radiation_monochromator         graphite
_diffrn_radiation_probe                 x-ray
_diffrn_detector                        'CCD plate'
_diffrn_orient_matrix_type              'by Nonius Collect from scalepack cell'
_diffrn_orient_matrix_ub_11             -0.310355E-1
_diffrn_orient_matrix_ub_12             0.198432E-1
_diffrn_orient_matrix_ub_13             -0.533435E-1
_diffrn_orient_matrix_ub_21             0.08985
_diffrn_orient_matrix_ub_22             0.209828E-1
_diffrn_orient_matrix_ub_23             0.114691E-1
_diffrn_orient_matrix_ub_31             0.412815E-1
_diffrn_orient_matrix_ub_32             -0.307514E-1
_diffrn_orient_matrix_ub_33             -0.265956E-1
_diffrn_measurement_device              '95mm CCD camera on \k-goniostat'
_diffrn_measurement_device_type         KappaCCD
_diffrn_measurement_method              'CCD rotation images, thick slices'
_diffrn_reflns_av_R_equivalents         0.0772
_diffrn_reflns_av_unetI/netI            0.0473
_diffrn_reflns_number                   57848
_diffrn_reflns_limit_h_min              -12
_diffrn_reflns_limit_h_max              12
_diffrn_reflns_limit_k_min              -30
_diffrn_reflns_limit_k_max              30
_diffrn_reflns_limit_l_min              -22
_diffrn_reflns_limit_l_max              22
_diffrn_reflns_theta_min                3.44
_diffrn_reflns_theta_max                27.11
_diffrn_reflns_theta_full               27.11
_diffrn_measured_fraction_theta_full
                                        0.998
_diffrn_measured_fraction_theta_max
                                        0.998
_reflns_number_total                    8576
_reflns_number_gt                       6730
_reflns_threshold_expression            >2sigma(I)
 
#----------------------------------------------------------------------------#
#                   COMPUTER PROGRAMS USED                                   #
#----------------------------------------------------------------------------#
 
_computing_data_collection              'Collect (Nonius BV, 1997-2000)'
_computing_cell_refinement
                                       'HKL Scalepack (Otwinowski & Minor 1997)'
_computing_data_reduction
                             'HKL Denzo and Scalepack (Otwinowski & Minor 1997)'
_computing_structure_solution           'SHELXS-97 (Sheldrick, 1997)'
_computing_structure_refinement         'SHELXL-97 (Sheldrick, 1997)'
_computing_molecular_graphics           'Ortep-3 for Windows (Farrugia, 1997)'
_computing_publication_material
                                   'WinGX publication routines (Farrugia, 1999)'
 
#----------------------------------------------------------------------------#
#                   REFINEMENT INFORMATION                                   #
#----------------------------------------------------------------------------#
 
_refine_special_details
;
 Refinement of F^2^ against ALL reflections.  The weighted R-factor wR and
 goodness of fit S are based on F^2^, conventional R-factors R are based
 on F, with F set to zero for negative F^2^. The threshold expression of
 F^2^ > 2sigma(F^2^) is used only for calculating R-factors(gt) etc. and is
 not relevant to the choice of reflections for refinement.  R-factors based
 on F^2^ are statistically about twice as large as those based on F, and R-
 factors based on ALL data will be even larger.
;
_refine_ls_structure_factor_coef        Fsqd
_refine_ls_matrix_type                  full
_refine_ls_weighting_scheme             calc
_refine_ls_weighting_details
         'calc w=1/[\s^2^(Fo^2^)+(0.0276P)^2^+4.0761P] where P=(Fo^2^+2Fc^2^)/3'
_atom_sites_solution_primary            direct
_atom_sites_solution_secondary          difmap
_atom_sites_solution_hydrogens          geom
_refine_ls_hydrogen_treatment           constr
_refine_ls_extinction_method            none
_refine_ls_number_reflns                8576
_refine_ls_number_parameters            408
_refine_ls_number_restraints            0
_refine_ls_R_factor_all                 0.0577
_refine_ls_R_factor_gt                  0.0368
_refine_ls_wR_factor_ref                0.079
_refine_ls_wR_factor_gt                 0.0724
_refine_ls_goodness_of_fit_ref          1.023
_refine_ls_restrained_S_all             1.023
_refine_ls_shift/su_max                 0.003
_refine_ls_shift/su_mean                0
_refine_diff_density_max                0.476
_refine_diff_density_min                -0.81
_refine_diff_density_rms                0.077
 
#----------------------------------------------------------------------------#
#                   ATOMIC TYPES, COORDINATES AND THERMAL PARAMETERS         #
#----------------------------------------------------------------------------#
 
loop_
    _atom_type_symbol
    _atom_type_description
    _atom_type_scat_dispersion_real
    _atom_type_scat_dispersion_imag
    _atom_type_scat_source
C C 0.0033 0.0016 'International Tables Vol C Tables 4.2.6.8 and 6.1.1.4'
H H 0 0 'International Tables Vol C Tables 4.2.6.8 and 6.1.1.4'
N N 0.0061 0.0033 'International Tables Vol C Tables 4.2.6.8 and 6.1.1.4'
P P 0.1023 0.0942 'International Tables Vol C Tables 4.2.6.8 and 6.1.1.4'
Sn Sn -0.6537 1.4246 'International Tables Vol C Tables 4.2.6.8 and 6.1.1.4'
 
loop_
    _atom_site_label
    _atom_site_type_symbol
    _atom_site_fract_x
    _atom_site_fract_y
    _atom_site_fract_z
    _atom_site_U_iso_or_equiv
    _atom_site_adp_type
    _atom_site_occupancy
    _atom_site_symmetry_multiplicity
    _atom_site_calc_flag
    _atom_site_refinement_flags
    _atom_site_disorder_assembly
    _atom_site_disorder_group
Sn Sn 0.184328(17) 0.817487(7) 0.286821(10) 0.01792(6) Uani 1 1 d . . .
P P 0.15121(7) 0.82930(3) 0.13159(4) 0.02307(16) Uani 1 1 d . . .
N1 N 0.3436(2) 0.88413(8) 0.34423(13) 0.0184(4) Uani 1 1 d . . .
N2 N 0.3734(2) 0.76122(9) 0.32387(13) 0.0192(5) Uani 1 1 d . . .
C1 C 0.4435(3) 0.87260(11) 0.41428(15) 0.0205(5) Uani 1 1 d . . .
C2 C 0.4902(3) 0.81814(12) 0.44057(16) 0.0253(6) Uani 1 1 d . . .
H2 H 0.5414 0.8144 0.4968 0.03 Uiso 1 1 calc R . .
C3 C 0.4715(3) 0.76818(11) 0.39498(16) 0.0233(6) Uani 1 1 d . . .
C4 C 0.5163(3) 0.91973(12) 0.47101(18) 0.0326(7) Uani 1 1 d . . .
H4A H 0.5164 0.954 0.4395 0.049 Uiso 1 1 calc R . .
H4B H 0.6142 0.9088 0.5008 0.049 Uiso 1 1 calc R . .
H4C H 0.4654 0.927 0.5096 0.049 Uiso 1 1 calc R . .
C5 C 0.5742(3) 0.72079(12) 0.43187(19) 0.0372(7) Uani 1 1 d . . .
H5A H 0.5324 0.6956 0.4626 0.056 Uiso 1 1 calc R . .
H5B H 0.6628 0.7366 0.4684 0.056 Uiso 1 1 calc R . .
H5C H 0.5939 0.6994 0.3886 0.056 Uiso 1 1 calc R . .
C6 C 0.3159(3) 0.94214(10) 0.31911(15) 0.0193(5) Uani 1 1 d . . .
C7 C 0.3777(3) 0.96427(11) 0.26358(16) 0.0239(6) Uani 1 1 d . . .
C8 C 0.3514(3) 1.02035(12) 0.24065(19) 0.0314(7) Uani 1 1 d . . .
H8 H 0.3934 1.0363 0.2039 0.038 Uiso 1 1 calc R . .
C9 C 0.2654(3) 1.05341(12) 0.27029(19) 0.0348(7) Uani 1 1 d . . .
H9 H 0.2502 1.0919 0.2546 0.042 Uiso 1 1 calc R . .
C10 C 0.2015(3) 1.03083(12) 0.32258(18) 0.0297(6) Uani 1 1 d . . .
H10 H 0.1408 1.0537 0.3416 0.036 Uiso 1 1 calc R . .
C11 C 0.2248(3) 0.97478(11) 0.34790(16) 0.0227(6) Uani 1 1 d . . .
C12 C 0.4713(3) 0.92761(12) 0.23000(17) 0.0277(6) Uani 1 1 d . . .
H12 H 0.4361 0.888 0.2281 0.033 Uiso 1 1 calc R . .
C13 C 0.6250(3) 0.92796(17) 0.2856(2) 0.0496(9) Uani 1 1 d . . .
H13A H 0.682 0.9039 0.2624 0.074 Uiso 1 1 calc R . .
H13B H 0.6301 0.9136 0.3392 0.074 Uiso 1 1 calc R . .
H13C H 0.6618 0.9666 0.2908 0.074 Uiso 1 1 calc R . .
C14 C 0.4638(4) 0.94349(16) 0.1438(2) 0.0461(8) Uani 1 1 d . . .
H14A H 0.5256 0.9184 0.1256 0.069 Uiso 1 1 calc R . .
H14B H 0.4952 0.9826 0.143 0.069 Uiso 1 1 calc R . .
H14C H 0.3659 0.9397 0.1074 0.069 Uiso 1 1 calc R . .
C15 C 0.1468(3) 0.95053(12) 0.40236(16) 0.0246(6) Uani 1 1 d . . .
H15 H 0.1803 0.9109 0.4161 0.03 Uiso 1 1 calc R . .
C16 C 0.1761(3) 0.98316(13) 0.48212(18) 0.0364(7) Uani 1 1 d . . .
H16A H 0.1237 0.9657 0.5148 0.055 Uiso 1 1 calc R . .
H16B H 0.1453 1.0224 0.4702 0.055 Uiso 1 1 calc R . .
H16C H 0.2779 0.9822 0.5123 0.055 Uiso 1 1 calc R . .
C17 C -0.0128(3) 0.94869(14) 0.35776(19) 0.0363(7) Uani 1 1 d . . .
H17A H -0.0611 0.9328 0.3936 0.054 Uiso 1 1 calc R . .
H17B H -0.032 0.9251 0.3092 0.054 Uiso 1 1 calc R . .
H17C H -0.0478 0.987 0.3418 0.054 Uiso 1 1 calc R . .
C18 C 0.3713(3) 0.71069(11) 0.27796(16) 0.0231(6) Uani 1 1 d . . .
C19 C 0.4458(3) 0.70937(13) 0.22243(18) 0.0315(7) Uani 1 1 d . . .
C20 C 0.4350(3) 0.66114(14) 0.1752(2) 0.0410(8) Uani 1 1 d . . .
H20 H 0.4845 0.6595 0.137 0.049 Uiso 1 1 calc R . .
C21 C 0.3540(4) 0.61565(14) 0.1828(2) 0.0434(8) Uani 1 1 d . . .
H21 H 0.3464 0.5834 0.1492 0.052 Uiso 1 1 calc R . .
C22 C 0.2841(3) 0.61707(13) 0.23933(19) 0.0375(7) Uani 1 1 d . . .
H22 H 0.23 0.5852 0.2448 0.045 Uiso 1 1 calc R . .
C23 C 0.2908(3) 0.66395(12) 0.28848(17) 0.0265(6) Uani 1 1 d . . .
C24 C 0.5431(3) 0.75745(14) 0.2167(2) 0.0429(8) Uani 1 1 d . . .
H24 H 0.526 0.7898 0.2492 0.051 Uiso 1 1 calc R . .
C25 C 0.6996(4) 0.7399(2) 0.2537(3) 0.0888(17) Uani 1 1 d . . .
H25A H 0.7175 0.727 0.3096 0.133 Uiso 1 1 calc R . .
H25B H 0.7606 0.7723 0.2536 0.133 Uiso 1 1 calc R . .
H25C H 0.7202 0.7093 0.2214 0.133 Uiso 1 1 calc R . .
C26 C 0.5163(4) 0.77796(17) 0.1310(2) 0.0594(10) Uani 1 1 d . . .
H26A H 0.5815 0.8089 0.1313 0.089 Uiso 1 1 calc R . .
H26B H 0.4182 0.7914 0.1085 0.089 Uiso 1 1 calc R . .
H26C H 0.5315 0.7469 0.0977 0.089 Uiso 1 1 calc R . .
C27 C 0.2194(3) 0.66280(13) 0.35355(18) 0.0334(7) Uani 1 1 d . . .
H27 H 0.2352 0.7003 0.3814 0.04 Uiso 1 1 calc R . .
C28 C 0.2857(4) 0.61742(16) 0.4174(2) 0.0558(10) Uani 1 1 d . . .
H28A H 0.2385 0.6176 0.4587 0.084 Uiso 1 1 calc R . .
H28B H 0.3869 0.6254 0.4431 0.084 Uiso 1 1 calc R . .
H28C H 0.274 0.5803 0.3912 0.084 Uiso 1 1 calc R . .
C29 C 0.0604(4) 0.65308(15) 0.3187(2) 0.0430(8) Uani 1 1 d . . .
H29A H 0.0195 0.6531 0.3627 0.065 Uiso 1 1 calc R . .
H29B H 0.0422 0.6166 0.2906 0.065 Uiso 1 1 calc R . .
H29C H 0.0171 0.6833 0.2802 0.065 Uiso 1 1 calc R . .
C30 C -0.0174(3) 0.87135(11) 0.10715(16) 0.0245(6) Uani 1 1 d . . .
H30 H -0.0803 0.8533 0.1345 0.029 Uiso 1 1 calc R . .
C31 C -0.0982(3) 0.87481(13) 0.01587(17) 0.0322(7) Uani 1 1 d . . .
H31A H -0.0354 0.8912 -0.0122 0.039 Uiso 1 1 calc R . .
H31B H -0.1246 0.8363 -0.0057 0.039 Uiso 1 1 calc R . .
C32 C -0.2318(3) 0.91074(13) -0.00210(19) 0.0400(8) Uani 1 1 d . . .
H32A H -0.2985 0.8925 0.0216 0.048 Uiso 1 1 calc R . .
H32B H -0.2787 0.9132 -0.0616 0.048 Uiso 1 1 calc R . .
C33 C -0.1976(4) 0.97013(13) 0.0327(2) 0.0447(8) Uani 1 1 d . . .
H33A H -0.1407 0.9903 0.0042 0.054 Uiso 1 1 calc R . .
H33B H -0.2869 0.9914 0.024 0.054 Uiso 1 1 calc R . .
C34 C -0.1152(3) 0.96758(14) 0.1233(2) 0.0438(8) Uani 1 1 d . . .
H34A H -0.1768 0.9518 0.1525 0.053 Uiso 1 1 calc R . .
H34B H -0.0876 1.0062 0.1439 0.053 Uiso 1 1 calc R . .
C35 C 0.0178(3) 0.93115(12) 0.14032(19) 0.0337(7) Uani 1 1 d . . .
H35A H 0.0832 0.9489 0.1152 0.04 Uiso 1 1 calc R . .
H35B H 0.0668 0.9293 0.1996 0.04 Uiso 1 1 calc R . .
C36 C 0.0861(3) 0.75503(11) 0.10096(16) 0.0233(6) Uani 1 1 d . . .
H36 H 0.1593 0.7295 0.1374 0.028 Uiso 1 1 calc R . .
C37 C 0.0832(3) 0.74124(12) 0.01412(17) 0.0316(7) Uani 1 1 d . . .
H37A H 0.0137 0.7661 -0.0247 0.038 Uiso 1 1 calc R . .
H37B H 0.1778 0.7489 0.0093 0.038 Uiso 1 1 calc R . .
C38 C 0.0435(4) 0.67961(13) -0.00783(19) 0.0392(7) Uani 1 1 d . . .
H38A H 0.0361 0.673 -0.0652 0.047 Uiso 1 1 calc R . .
H38B H 0.1192 0.6548 0.0266 0.047 Uiso 1 1 calc R . .
C39 C -0.0966(3) 0.66453(13) 0.00412(18) 0.0357(7) Uani 1 1 d . . .
H39A H -0.174 0.6866 -0.0342 0.043 Uiso 1 1 calc R . .
H39B H -0.1169 0.624 -0.008 0.043 Uiso 1 1 calc R . .
C40 C -0.0928(3) 0.67654(12) 0.09002(18) 0.0330(7) Uani 1 1 d . . .
H40A H -0.0218 0.6518 0.1281 0.04 Uiso 1 1 calc R . .
H40B H -0.1866 0.6681 0.0953 0.04 Uiso 1 1 calc R . .
C41 C -0.0545(3) 0.73856(11) 0.11245(16) 0.0251(6) Uani 1 1 d . . .
H41A H -0.1309 0.7631 0.0781 0.03 Uiso 1 1 calc R . .
H41B H -0.0477 0.7448 0.1698 0.03 Uiso 1 1 calc R . .
 
loop_
    _atom_site_aniso_label
    _atom_site_aniso_U_11
    _atom_site_aniso_U_22
    _atom_site_aniso_U_33
    _atom_site_aniso_U_23
    _atom_site_aniso_U_13
    _atom_site_aniso_U_12
Sn 0.01553(9) 0.01495(9) 0.02218(9) -0.00106(8) 0.00464(7) -0.00023(7)
P 0.0226(3) 0.0212(4) 0.0238(4) 0.0004(3) 0.0054(3) -0.0012(3)
N1 0.0160(10) 0.0131(11) 0.0239(11) -0.0011(9) 0.0034(9) -0.0011(8)
N2 0.0183(11) 0.0147(11) 0.0237(11) 0.0008(9) 0.0057(9) 0.0029(8)
C1 0.0183(13) 0.0190(13) 0.0233(13) -0.0017(11) 0.0056(11) -0.0030(11)
C2 0.0261(14) 0.0226(14) 0.0218(13) 0.0013(12) 0.0003(11) 0.0011(12)
C3 0.0214(13) 0.0191(14) 0.0272(14) 0.0049(11) 0.0049(12) 0.0017(11)
C4 0.0311(16) 0.0229(16) 0.0338(16) -0.0037(13) -0.0031(13) -0.0013(12)
C5 0.0356(17) 0.0228(16) 0.0399(18) 0.0022(13) -0.0058(14) 0.0103(13)
C6 0.0144(12) 0.0134(13) 0.0248(13) -0.0007(10) -0.0008(11) -0.0022(10)
C7 0.0186(13) 0.0204(14) 0.0303(15) 0.0023(11) 0.0047(12) -0.0035(11)
C8 0.0251(15) 0.0285(16) 0.0390(17) 0.0101(13) 0.0081(13) -0.0053(12)
C9 0.0341(16) 0.0166(15) 0.0499(19) 0.0097(13) 0.0082(15) 0.0007(12)
C10 0.0276(15) 0.0173(14) 0.0433(17) 0.0002(13) 0.0104(13) 0.0027(12)
C11 0.0200(13) 0.0168(13) 0.0287(14) -0.0030(11) 0.0044(12) -0.0026(10)
C12 0.0227(14) 0.0286(16) 0.0325(16) 0.0009(13) 0.0101(13) -0.0023(12)
C13 0.0235(16) 0.069(3) 0.056(2) -0.0024(19) 0.0130(16) 0.0045(17)
C14 0.049(2) 0.052(2) 0.0426(19) 0.0051(17) 0.0222(17) 0.0022(17)
C15 0.0236(14) 0.0189(14) 0.0322(15) -0.0047(12) 0.0102(12) -0.0021(11)
C16 0.0394(18) 0.0346(18) 0.0382(18) -0.0087(14) 0.0168(15) -0.0052(14)
C17 0.0237(15) 0.044(2) 0.0420(18) -0.0011(15) 0.0121(14) -0.0050(14)
C18 0.0222(14) 0.0180(14) 0.0262(14) -0.0011(11) 0.0038(12) 0.0069(11)
C19 0.0247(15) 0.0301(17) 0.0374(17) -0.0053(13) 0.0067(13) 0.0068(12)
C20 0.0391(18) 0.0376(19) 0.048(2) -0.0124(16) 0.0169(16) 0.0119(15)
C21 0.046(2) 0.0282(18) 0.050(2) -0.0179(15) 0.0089(17) 0.0091(15)
C22 0.0428(18) 0.0178(16) 0.0445(19) -0.0030(13) 0.0039(16) 0.0010(13)
C23 0.0291(15) 0.0178(14) 0.0262(14) 0.0005(11) 0.0002(12) 0.0037(11)
C24 0.0420(19) 0.041(2) 0.058(2) -0.0132(17) 0.0323(18) -0.0048(15)
C25 0.038(2) 0.126(5) 0.102(4) 0.028(3) 0.023(2) -0.015(3)
C26 0.068(3) 0.049(2) 0.072(3) 0.003(2) 0.037(2) 0.000(2)
C27 0.0460(19) 0.0213(15) 0.0306(16) 0.0045(12) 0.0094(15) -0.0073(13)
C28 0.058(2) 0.052(2) 0.046(2) 0.0207(18) -0.0001(18) -0.0135(19)
C29 0.046(2) 0.047(2) 0.0369(18) 0.0100(16) 0.0145(16) -0.0017(16)
C30 0.0257(14) 0.0183(14) 0.0263(14) 0.0019(11) 0.0040(12) 0.0009(11)
C31 0.0371(17) 0.0259(16) 0.0260(15) -0.0016(12) 0.0000(13) 0.0028(13)
C32 0.0415(18) 0.0297(17) 0.0334(17) 0.0005(14) -0.0088(14) 0.0083(14)
C33 0.046(2) 0.0257(17) 0.049(2) 0.0021(15) -0.0026(16) 0.0108(15)
C34 0.0422(19) 0.0279(18) 0.0453(19) -0.0072(15) -0.0077(16) 0.0128(14)
C35 0.0330(16) 0.0237(16) 0.0348(17) -0.0027(13) -0.0023(14) 0.0023(13)
C36 0.0243(14) 0.0188(14) 0.0237(14) 0.0001(11) 0.0037(11) 0.0030(11)
C37 0.0384(17) 0.0283(16) 0.0304(16) -0.0054(13) 0.0144(14) -0.0020(13)
C38 0.054(2) 0.0297(17) 0.0365(17) -0.0094(14) 0.0185(16) 0.0027(15)
C39 0.0482(19) 0.0214(15) 0.0349(17) -0.0087(13) 0.0098(15) -0.0044(13)
C40 0.0367(16) 0.0252(16) 0.0360(16) -0.0020(13) 0.0102(14) -0.0077(13)
C41 0.0280(15) 0.0209(14) 0.0238(14) -0.0006(11) 0.0050(12) -0.0016(12)
 
 
#----------------------------------------------------------------------------#
#                   MOLECULAR GEOMETRY                                       #
#----------------------------------------------------------------------------#
 
_geom_special_details
;
 All esds (except the esd in the dihedral angle between two l.s. planes)
 are estimated using the full covariance matrix.  The cell esds are taken
 into account individually in the estimation of esds in distances, angles
 and torsion angles; correlations between esds in cell parameters are only
 used when they are defined by crystal symmetry.  An approximate (isotropic)
 treatment of cell esds is used for estimating esds involving l.s. planes.
;
loop_
    _geom_bond_atom_site_label_1
    _geom_bond_atom_site_label_2
    _geom_bond_distance
    _geom_bond_site_symmetry_2
    _geom_bond_publ_flag
Sn N2 2.227(2) . ?
Sn N1 2.233(2) . ?
Sn P 2.6309(7) . ?
P C30 1.881(3) . ?
P C36 1.892(3) . ?
N1 C1 1.328(3) . ?
N1 C6 1.442(3) . ?
N2 C3 1.315(3) . ?
N2 C18 1.437(3) . ?
C1 C2 1.398(4) . ?
C1 C4 1.512(4) . ?
C2 C3 1.404(4) . ?
C2 H2 0.95 . ?
C3 C5 1.515(4) . ?
C4 H4A 0.98 . ?
C4 H4B 0.98 . ?
C4 H4C 0.98 . ?
C5 H5A 0.98 . ?
C5 H5B 0.98 . ?
C5 H5C 0.98 . ?
C6 C11 1.405(4) . ?
C6 C7 1.407(4) . ?
C7 C8 1.388(4) . ?
C7 C12 1.525(4) . ?
C8 C9 1.380(4) . ?
C8 H8 0.95 . ?
C9 C10 1.379(4) . ?
C9 H9 0.95 . ?
C10 C11 1.396(4) . ?
C10 H10 0.95 . ?
C11 C15 1.522(4) . ?
C12 C13 1.523(4) . ?
C12 C14 1.526(4) . ?
C12 H12 1 . ?
C13 H13A 0.98 . ?
C13 H13B 0.98 . ?
C13 H13C 0.98 . ?
C14 H14A 0.98 . ?
C14 H14B 0.98 . ?
C14 H14C 0.98 . ?
C15 C17 1.528(4) . ?
C15 C16 1.533(4) . ?
C15 H15 1 . ?
C16 H16A 0.98 . ?
C16 H16B 0.98 . ?
C16 H16C 0.98 . ?
C17 H17A 0.98 . ?
C17 H17B 0.98 . ?
C17 H17C 0.98 . ?
C18 C19 1.399(4) . ?
C18 C23 1.414(4) . ?
C19 C20 1.392(4) . ?
C19 C24 1.521(4) . ?
C20 C21 1.379(5) . ?
C20 H20 0.95 . ?
C21 C22 1.381(5) . ?
C21 H21 0.95 . ?
C22 C23 1.391(4) . ?
C22 H22 0.95 . ?
C23 C27 1.523(4) . ?
C24 C26 1.508(5) . ?
C24 C25 1.538(5) . ?
C24 H24 1 . ?
C25 H25A 0.98 . ?
C25 H25B 0.98 . ?
C25 H25C 0.98 . ?
C26 H26A 0.98 . ?
C26 H26B 0.98 . ?
C26 H26C 0.98 . ?
C27 C29 1.519(4) . ?
C27 C28 1.534(4) . ?
C27 H27 1 . ?
C28 H28A 0.98 . ?
C28 H28B 0.98 . ?
C28 H28C 0.98 . ?
C29 H29A 0.98 . ?
C29 H29B 0.98 . ?
C29 H29C 0.98 . ?
C30 C35 1.528(4) . ?
C30 C31 1.533(4) . ?
C30 H30 1 . ?
C31 C32 1.525(4) . ?
C31 H31A 0.99 . ?
C31 H31B 0.99 . ?
C32 C33 1.527(4) . ?
C32 H32A 0.99 . ?
C32 H32B 0.99 . ?
C33 C34 1.525(4) . ?
C33 H33A 0.99 . ?
C33 H33B 0.99 . ?
C34 C35 1.528(4) . ?
C34 H34A 0.99 . ?
C34 H34B 0.99 . ?
C35 H35A 0.99 . ?
C35 H35B 0.99 . ?
C36 C41 1.530(4) . ?
C36 C37 1.539(4) . ?
C36 H36 1 . ?
C37 C38 1.529(4) . ?
C37 H37A 0.99 . ?
C37 H37B 0.99 . ?
C38 C39 1.521(4) . ?
C38 H38A 0.99 . ?
C38 H38B 0.99 . ?
C39 C40 1.512(4) . ?
C39 H39A 0.99 . ?
C39 H39B 0.99 . ?
C40 C41 1.537(4) . ?
C40 H40A 0.99 . ?
C40 H40B 0.99 . ?
C41 H41A 0.99 . ?
C41 H41B 0.99 . ?
 
loop_
    _geom_angle_atom_site_label_1
    _geom_angle_atom_site_label_2
    _geom_angle_atom_site_label_3
    _geom_angle
    _geom_angle_site_symmetry_1
    _geom_angle_site_symmetry_3
    _geom_angle_publ_flag
N2 Sn N1 83.23(8) . . ?
N2 Sn P 99.95(6) . . ?
N1 Sn P 102.60(6) . . ?
C30 P C36 103.30(12) . . ?
C30 P Sn 95.33(9) . . ?
C36 P Sn 96.18(8) . . ?
C1 N1 C6 119.2(2) . . ?
C1 N1 Sn 118.50(16) . . ?
C6 N1 Sn 120.05(15) . . ?
C3 N2 C18 120.1(2) . . ?
C3 N2 Sn 119.85(17) . . ?
C18 N2 Sn 118.71(16) . . ?
N1 C1 C2 124.1(2) . . ?
N1 C1 C4 120.4(2) . . ?
C2 C1 C4 115.5(2) . . ?
C1 C2 C3 128.7(2) . . ?
C1 C2 H2 115.7 . . ?
C3 C2 H2 115.7 . . ?
N2 C3 C2 124.0(2) . . ?
N2 C3 C5 120.0(2) . . ?
C2 C3 C5 116.0(2) . . ?
C1 C4 H4A 109.5 . . ?
C1 C4 H4B 109.5 . . ?
H4A C4 H4B 109.5 . . ?
C1 C4 H4C 109.5 . . ?
H4A C4 H4C 109.5 . . ?
H4B C4 H4C 109.5 . . ?
C3 C5 H5A 109.5 . . ?
C3 C5 H5B 109.5 . . ?
H5A C5 H5B 109.5 . . ?
C3 C5 H5C 109.5 . . ?
H5A C5 H5C 109.5 . . ?
H5B C5 H5C 109.5 . . ?
C11 C6 C7 121.3(2) . . ?
C11 C6 N1 119.9(2) . . ?
C7 C6 N1 118.8(2) . . ?
C8 C7 C6 118.1(2) . . ?
C8 C7 C12 121.2(2) . . ?
C6 C7 C12 120.7(2) . . ?
C9 C8 C7 121.2(3) . . ?
C9 C8 H8 119.4 . . ?
C7 C8 H8 119.4 . . ?
C10 C9 C8 120.3(3) . . ?
C10 C9 H9 119.9 . . ?
C8 C9 H9 119.9 . . ?
C9 C10 C11 120.9(3) . . ?
C9 C10 H10 119.6 . . ?
C11 C10 H10 119.6 . . ?
C10 C11 C6 118.1(2) . . ?
C10 C11 C15 119.4(2) . . ?
C6 C11 C15 122.4(2) . . ?
C13 C12 C7 111.6(2) . . ?
C13 C12 C14 109.9(3) . . ?
C7 C12 C14 113.4(2) . . ?
C13 C12 H12 107.2 . . ?
C7 C12 H12 107.2 . . ?
C14 C12 H12 107.2 . . ?
C12 C13 H13A 109.5 . . ?
C12 C13 H13B 109.5 . . ?
H13A C13 H13B 109.5 . . ?
C12 C13 H13C 109.5 . . ?
H13A C13 H13C 109.5 . . ?
H13B C13 H13C 109.5 . . ?
C12 C14 H14A 109.5 . . ?
C12 C14 H14B 109.5 . . ?
H14A C14 H14B 109.5 . . ?
C12 C14 H14C 109.5 . . ?
H14A C14 H14C 109.5 . . ?
H14B C14 H14C 109.5 . . ?
C11 C15 C17 110.7(2) . . ?
C11 C15 C16 112.9(2) . . ?
C17 C15 C16 109.6(2) . . ?
C11 C15 H15 107.8 . . ?
C17 C15 H15 107.8 . . ?
C16 C15 H15 107.8 . . ?
C15 C16 H16A 109.5 . . ?
C15 C16 H16B 109.5 . . ?
H16A C16 H16B 109.5 . . ?
C15 C16 H16C 109.5 . . ?
H16A C16 H16C 109.5 . . ?
H16B C16 H16C 109.5 . . ?
C15 C17 H17A 109.5 . . ?
C15 C17 H17B 109.5 . . ?
H17A C17 H17B 109.5 . . ?
C15 C17 H17C 109.5 . . ?
H17A C17 H17C 109.5 . . ?
H17B C17 H17C 109.5 . . ?
C19 C18 C23 121.6(3) . . ?
C19 C18 N2 119.3(2) . . ?
C23 C18 N2 119.2(2) . . ?
C20 C19 C18 118.1(3) . . ?
C20 C19 C24 120.3(3) . . ?
C18 C19 C24 121.5(3) . . ?
C21 C20 C19 121.4(3) . . ?
C21 C20 H20 119.3 . . ?
C19 C20 H20 119.3 . . ?
C20 C21 C22 119.8(3) . . ?
C20 C21 H21 120.1 . . ?
C22 C21 H21 120.1 . . ?
C21 C22 C23 121.6(3) . . ?
C21 C22 H22 119.2 . . ?
C23 C22 H22 119.2 . . ?
C22 C23 C18 117.5(3) . . ?
C22 C23 C27 120.2(3) . . ?
C18 C23 C27 122.2(2) . . ?
C26 C24 C19 113.3(3) . . ?
C26 C24 C25 109.4(3) . . ?
C19 C24 C25 110.6(3) . . ?
C26 C24 H24 107.8 . . ?
C19 C24 H24 107.8 . . ?
C25 C24 H24 107.8 . . ?
C24 C25 H25A 109.5 . . ?
C24 C25 H25B 109.5 . . ?
H25A C25 H25B 109.5 . . ?
C24 C25 H25C 109.5 . . ?
H25A C25 H25C 109.5 . . ?
H25B C25 H25C 109.5 . . ?
C24 C26 H26A 109.5 . . ?
C24 C26 H26B 109.5 . . ?
H26A C26 H26B 109.5 . . ?
C24 C26 H26C 109.5 . . ?
H26A C26 H26C 109.5 . . ?
H26B C26 H26C 109.5 . . ?
C29 C27 C23 112.6(2) . . ?
C29 C27 C28 109.3(3) . . ?
C23 C27 C28 110.9(3) . . ?
C29 C27 H27 107.9 . . ?
C23 C27 H27 107.9 . . ?
C28 C27 H27 107.9 . . ?
C27 C28 H28A 109.5 . . ?
C27 C28 H28B 109.5 . . ?
H28A C28 H28B 109.5 . . ?
C27 C28 H28C 109.5 . . ?
H28A C28 H28C 109.5 . . ?
H28B C28 H28C 109.5 . . ?
C27 C29 H29A 109.5 . . ?
C27 C29 H29B 109.5 . . ?
H29A C29 H29B 109.5 . . ?
C27 C29 H29C 109.5 . . ?
H29A C29 H29C 109.5 . . ?
H29B C29 H29C 109.5 . . ?
C35 C30 C31 108.7(2) . . ?
C35 C30 P 109.13(19) . . ?
C31 C30 P 113.09(19) . . ?
C35 C30 H30 108.6 . . ?
C31 C30 H30 108.6 . . ?
P C30 H30 108.6 . . ?
C32 C31 C30 111.8(2) . . ?
C32 C31 H31A 109.3 . . ?
C30 C31 H31A 109.3 . . ?
C32 C31 H31B 109.3 . . ?
C30 C31 H31B 109.3 . . ?
H31A C31 H31B 107.9 . . ?
C31 C32 C33 111.5(3) . . ?
C31 C32 H32A 109.3 . . ?
C33 C32 H32A 109.3 . . ?
C31 C32 H32B 109.3 . . ?
C33 C32 H32B 109.3 . . ?
H32A C32 H32B 108 . . ?
C34 C33 C32 110.5(3) . . ?
C34 C33 H33A 109.5 . . ?
C32 C33 H33A 109.5 . . ?
C34 C33 H33B 109.5 . . ?
C32 C33 H33B 109.5 . . ?
H33A C33 H33B 108.1 . . ?
C33 C34 C35 111.4(3) . . ?
C33 C34 H34A 109.4 . . ?
C35 C34 H34A 109.4 . . ?
C33 C34 H34B 109.4 . . ?
C35 C34 H34B 109.4 . . ?
H34A C34 H34B 108 . . ?
C30 C35 C34 111.9(2) . . ?
C30 C35 H35A 109.2 . . ?
C34 C35 H35A 109.2 . . ?
C30 C35 H35B 109.2 . . ?
C34 C35 H35B 109.2 . . ?
H35A C35 H35B 107.9 . . ?
C41 C36 C37 110.5(2) . . ?
C41 C36 P 116.44(18) . . ?
C37 C36 P 111.71(19) . . ?
C41 C36 H36 105.8 . . ?
C37 C36 H36 105.8 . . ?
P C36 H36 105.8 . . ?
C38 C37 C36 111.7(2) . . ?
C38 C37 H37A 109.3 . . ?
C36 C37 H37A 109.3 . . ?
C38 C37 H37B 109.3 . . ?
C36 C37 H37B 109.3 . . ?
H37A C37 H37B 107.9 . . ?
C39 C38 C37 111.4(2) . . ?
C39 C38 H38A 109.3 . . ?
C37 C38 H38A 109.3 . . ?
C39 C38 H38B 109.3 . . ?
C37 C38 H38B 109.3 . . ?
H38A C38 H38B 108 . . ?
C40 C39 C38 111.3(3) . . ?
C40 C39 H39A 109.4 . . ?
C38 C39 H39A 109.4 . . ?
C40 C39 H39B 109.4 . . ?
C38 C39 H39B 109.4 . . ?
H39A C39 H39B 108 . . ?
C39 C40 C41 110.9(2) . . ?
C39 C40 H40A 109.5 . . ?
C41 C40 H40A 109.5 . . ?
C39 C40 H40B 109.5 . . ?
C41 C40 H40B 109.5 . . ?
H40A C40 H40B 108.1 . . ?
C36 C41 C40 111.9(2) . . ?
C36 C41 H41A 109.2 . . ?
C40 C41 H41A 109.2 . . ?
C36 C41 H41B 109.2 . . ?
C40 C41 H41B 109.2 . . ?
H41A C41 H41B 107.9 . . ?
 
#===END

data_(2c)-mar210
 
_audit_creation_date                    2010-03-10T20:25:40-00:00
_audit_creation_method                  'WinGX routine CIF_UPDATE'
_audit_conform_dict_name                cif_core.dic
_audit_conform_dict_version             2.3
_audit_conform_dict_location            ftp://ftp.iucr.org/pub/cif_core.dic
_publ_requested_category                FM
 
#----------------------------------------------------------------------------#
#                   CHEMICAL INFORMATION                                     #
#----------------------------------------------------------------------------#
 
_chemical_name_systematic
;
 ?
;
_chemical_formula_moiety                'C35 H59 N2 P Si2 Sn'
_chemical_formula_sum                   'C35 H59 N2 P Si2 Sn'
_chemical_formula_weight                713.68
_chemical_compound_source               'synthesis as described'
 
#----------------------------------------------------------------------------#
#                   UNIT CELL INFORMATION                                    #
#----------------------------------------------------------------------------#
 
_symmetry_cell_setting                  monoclinic
_symmetry_space_group_name_H-M          'P 21/c'
_symmetry_space_group_name_Hall         '-P 2ybc'
_symmetry_Int_Tables_number             14
loop_
    _symmetry_equiv_pos_as_xyz
'x, y, z'
'-x, y+1/2, -z+1/2'
'-x, -y, -z'
'x, -y-1/2, z-1/2'
 
_cell_length_a                          12.1569(2)
_cell_length_b                          15.7065(2)
_cell_length_c                          23.4050(4)
_cell_angle_alpha                       90
_cell_angle_beta                        119.547(1)
_cell_angle_gamma                       90
_cell_volume                            3887.82(10)
_cell_formula_units_Z                   4
_cell_measurement_temperature           173(2)
_cell_measurement_reflns_used           42060
_cell_measurement_theta_min             3.395
_cell_measurement_theta_max             27.103
_cell_measurement_wavelength            0.71073
 
#----------------------------------------------------------------------------#
#                   CRYSTAL INFORMATION                                      #
#----------------------------------------------------------------------------#
 
_exptl_crystal_description              Plate
_exptl_crystal_colour                   Yellow
_exptl_crystal_size_max                 0.18
_exptl_crystal_size_mid                 0.1
_exptl_crystal_size_min                 0.06
_exptl_crystal_density_diffrn           1.219
_exptl_crystal_density_method           'not measured'
_exptl_crystal_F_000                    1504
_exptl_special_details
;
 ?
;
 
#----------------------------------------------------------------------------#
#                   ABSORPTION CORRECTION                                    #
#----------------------------------------------------------------------------#
 
_exptl_absorpt_coefficient_mu           0.784
_exptl_absorpt_correction_type          multi-scan
_exptl_absorpt_process_details
;
        [c.f. r.h. blessing, acta cryst. (1995), a51, 33-38]
;
_exptl_absorpt_correction_T_min         0.8629
_exptl_absorpt_correction_T_max         0.9663
 
#----------------------------------------------------------------------------#
#                   DATA COLLECTION                                          #
#----------------------------------------------------------------------------#
 
_diffrn_source                          'Enraf Nonius FR590'
_diffrn_ambient_temperature             173(2)
_diffrn_radiation_wavelength            0.71073
_diffrn_radiation_type                  MoK\a
_diffrn_radiation_monochromator         graphite
_diffrn_radiation_probe                 x-ray
_diffrn_detector                        'CCD plate'
_diffrn_detector_area_resol_mean        9
_diffrn_orient_matrix_type              'by Nonius Collect from scalepack cell'
_diffrn_orient_matrix_ub_11             -0.269609E-1
_diffrn_orient_matrix_ub_12             0.597062E-1
_diffrn_orient_matrix_ub_13             -0.61363E-2
_diffrn_orient_matrix_ub_21             0.89689E-2
_diffrn_orient_matrix_ub_22             0.100927E-1
_diffrn_orient_matrix_ub_23             0.483353E-1
_diffrn_orient_matrix_ub_31             0.772347E-1
_diffrn_orient_matrix_ub_32             0.196701E-1
_diffrn_orient_matrix_ub_33             -0.61749E-2
_diffrn_measurement_device              '95mm CCD camera on \k-goniostat'
_diffrn_measurement_device_type         KappaCCD
_diffrn_measurement_method              'CCD rotation images, thick slices'
_diffrn_reflns_av_R_equivalents         0.0764
_diffrn_reflns_av_unetI/netI            0.0463
_diffrn_reflns_number                   60531
_diffrn_reflns_limit_h_min              -15
_diffrn_reflns_limit_h_max              15
_diffrn_reflns_limit_k_min              -19
_diffrn_reflns_limit_k_max              20
_diffrn_reflns_limit_l_min              -29
_diffrn_reflns_limit_l_max              29
_diffrn_reflns_theta_min                3.48
_diffrn_reflns_theta_max                27.1
_diffrn_reflns_theta_full               27.1
_diffrn_measured_fraction_theta_full
                                        0.997
_diffrn_measured_fraction_theta_max
                                        0.997
_reflns_number_total                    8547
_reflns_number_gt                       6661
_reflns_threshold_expression            >2sigma(I)
 
#----------------------------------------------------------------------------#
#                   COMPUTER PROGRAMS USED                                   #
#----------------------------------------------------------------------------#
 
_computing_data_collection              'Collect (Nonius BV, 1997-2000)'
_computing_cell_refinement
                                       'HKL Scalepack (Otwinowski & Minor 1997)'
_computing_data_reduction
                             'HKL Denzo and Scalepack (Otwinowski & Minor 1997)'
_computing_structure_solution           'SHELXS-86 (Sheldrick, 1986)'
_computing_structure_refinement         'SHELXL-97 (Sheldrick, 1997)'
_computing_molecular_graphics           'Ortep-3 for Windows (Farrugia, 1997)'
_computing_publication_material
                                   'WinGX publication routines (Farrugia, 1999)'
 
#----------------------------------------------------------------------------#
#                   REFINEMENT INFORMATION                                   #
#----------------------------------------------------------------------------#
 
_refine_special_details
;
 Refinement of F^2^ against ALL reflections.  The weighted R-factor wR and
 goodness of fit S are based on F^2^, conventional R-factors R are based
 on F, with F set to zero for negative F^2^. The threshold expression of
 F^2^ > 2sigma(F^2^) is used only for calculating R-factors(gt) etc. and is
 not relevant to the choice of reflections for refinement.  R-factors based
 on F^2^ are statistically about twice as large as those based on F, and R-
 factors based on ALL data will be even larger.
;
_refine_ls_structure_factor_coef        Fsqd
_refine_ls_matrix_type                  full
_refine_ls_weighting_scheme             calc
_refine_ls_weighting_details
         'calc w=1/[\s^2^(Fo^2^)+(0.0349P)^2^+2.4685P] where P=(Fo^2^+2Fc^2^)/3'
_atom_sites_solution_primary            direct
_atom_sites_solution_secondary          difmap
_atom_sites_solution_hydrogens          geom
_refine_ls_hydrogen_treatment           constr
_refine_ls_extinction_method            none
_refine_ls_number_reflns                8547
_refine_ls_number_parameters            372
_refine_ls_number_restraints            0
_refine_ls_R_factor_all                 0.0561
_refine_ls_R_factor_gt                  0.0343
_refine_ls_wR_factor_ref                0.078
_refine_ls_wR_factor_gt                 0.0704
_refine_ls_goodness_of_fit_ref          0.991
_refine_ls_restrained_S_all             0.991
_refine_ls_shift/su_max                 0.001
_refine_ls_shift/su_mean                0
_refine_diff_density_max                0.451
_refine_diff_density_min                -0.694
_refine_diff_density_rms                0.073
 
#----------------------------------------------------------------------------#
#                   ATOMIC TYPES, COORDINATES AND THERMAL PARAMETERS         #
#----------------------------------------------------------------------------#
 
loop_
    _atom_type_symbol
    _atom_type_description
    _atom_type_scat_dispersion_real
    _atom_type_scat_dispersion_imag
    _atom_type_scat_source
C C 0.0033 0.0016 'International Tables Vol C Tables 4.2.6.8 and 6.1.1.4'
H H 0 0 'International Tables Vol C Tables 4.2.6.8 and 6.1.1.4'
N N 0.0061 0.0033 'International Tables Vol C Tables 4.2.6.8 and 6.1.1.4'
P P 0.1023 0.0942 'International Tables Vol C Tables 4.2.6.8 and 6.1.1.4'
Si Si 0.0817 0.0704 'International Tables Vol C Tables 4.2.6.8 and 6.1.1.4'
Sn Sn -0.6537 1.4246 'International Tables Vol C Tables 4.2.6.8 and 6.1.1.4'
 
loop_
    _atom_site_label
    _atom_site_type_symbol
    _atom_site_fract_x
    _atom_site_fract_y
    _atom_site_fract_z
    _atom_site_U_iso_or_equiv
    _atom_site_adp_type
    _atom_site_occupancy
    _atom_site_symmetry_multiplicity
    _atom_site_calc_flag
    _atom_site_refinement_flags
    _atom_site_disorder_assembly
    _atom_site_disorder_group
Sn Sn 0.227524(15) 0.162630(10) 0.153823(8) 0.01979(6) Uani 1 1 d . . .
P P 0.37728(7) 0.28215(5) 0.16248(4) 0.03722(19) Uani 1 1 d . . .
Si1 Si 0.52910(7) 0.23421(5) 0.14454(4) 0.03282(18) Uani 1 1 d . . .
Si2 Si 0.37807(7) 0.42344(5) 0.16696(4) 0.03411(19) Uani 1 1 d . . .
N1 N 0.04014(18) 0.22057(12) 0.08884(10) 0.0220(4) Uani 1 1 d . . .
N2 N 0.19978(19) 0.20880(12) 0.23553(9) 0.0213(4) Uani 1 1 d . . .
C1 C -0.0104(2) 0.28387(16) 0.10607(13) 0.0269(6) Uani 1 1 d . . .
C2 C 0.0338(3) 0.30983(16) 0.17089(13) 0.0316(6) Uani 1 1 d . . .
H2 H -0.0002 0.362 0.1757 0.038 Uiso 1 1 calc R . .
C3 C 0.1209(3) 0.27052(16) 0.23002(13) 0.0293(6) Uani 1 1 d . . .
C4 C -0.1260(3) 0.33033(19) 0.05455(14) 0.0409(7) Uani 1 1 d . . .
H4A H -0.0996 0.3764 0.0357 0.061 Uiso 1 1 calc R . .
H4B H -0.173 0.3543 0.0748 0.061 Uiso 1 1 calc R . .
H4C H -0.1802 0.2904 0.0198 0.061 Uiso 1 1 calc R . .
C5 C 0.1176(4) 0.3015(2) 0.29051(15) 0.0519(9) Uani 1 1 d . . .
H5A H 0.0425 0.2786 0.2904 0.078 Uiso 1 1 calc R . .
H5B H 0.1145 0.3639 0.2902 0.078 Uiso 1 1 calc R . .
H5C H 0.1937 0.2821 0.33 0.078 Uiso 1 1 calc R . .
C6 C -0.0271(2) 0.18821(17) 0.02227(12) 0.0262(6) Uani 1 1 d . . .
C7 C -0.0150(2) 0.22829(18) -0.02807(13) 0.0322(6) Uani 1 1 d . . .
C8 C -0.0824(3) 0.1947(2) -0.09130(14) 0.0469(8) Uani 1 1 d . . .
H8 H -0.0763 0.2213 -0.1261 0.056 Uiso 1 1 calc R . .
C9 C -0.1574(3) 0.1242(2) -0.10435(15) 0.0513(9) Uani 1 1 d . . .
H9 H -0.2035 0.1029 -0.1479 0.062 Uiso 1 1 calc R . .
C10 C -0.1662(3) 0.0841(2) -0.05461(15) 0.0437(8) Uani 1 1 d . . .
H10 H -0.2172 0.0345 -0.0643 0.052 Uiso 1 1 calc R . .
C11 C -0.1019(2) 0.11439(17) 0.00985(13) 0.0310(6) Uani 1 1 d . . .
C12 C 0.0687(3) 0.3049(2) -0.01709(14) 0.0400(7) Uani 1 1 d . . .
H12 H 0.1073 0.322 0.0301 0.048 Uiso 1 1 calc R . .
C13 C 0.1759(3) 0.2812(3) -0.03068(17) 0.0579(10) Uani 1 1 d . . .
H13A H 0.2301 0.3309 -0.0231 0.087 Uiso 1 1 calc R . .
H13B H 0.1401 0.2626 -0.0764 0.087 Uiso 1 1 calc R . .
H13C H 0.2261 0.2349 -0.0013 0.087 Uiso 1 1 calc R . .
C14 C -0.0064(4) 0.3812(3) -0.05961(18) 0.0658(11) Uani 1 1 d . . .
H14A H 0.0508 0.4296 -0.0507 0.099 Uiso 1 1 calc R . .
H14B H -0.0724 0.397 -0.0491 0.099 Uiso 1 1 calc R . .
H14C H -0.0455 0.3657 -0.1061 0.099 Uiso 1 1 calc R . .
C15 C -0.1150(3) 0.06942(18) 0.06347(15) 0.0366(7) Uani 1 1 d . . .
H15 H -0.0298 0.0694 0.1038 0.044 Uiso 1 1 calc R . .
C16 C -0.2060(3) 0.1157(2) 0.08055(18) 0.0509(8) Uani 1 1 d . . .
H16A H -0.211 0.0848 0.1156 0.076 Uiso 1 1 calc R . .
H16B H -0.2901 0.1183 0.0415 0.076 Uiso 1 1 calc R . .
H16C H -0.175 0.1736 0.0954 0.076 Uiso 1 1 calc R . .
C17 C -0.1570(3) -0.0232(2) 0.04702(19) 0.0599(10) Uani 1 1 d . . .
H17A H -0.0985 -0.0537 0.0368 0.09 Uiso 1 1 calc R . .
H17B H -0.2425 -0.0253 0.009 0.09 Uiso 1 1 calc R . .
H17C H -0.1571 -0.0502 0.0848 0.09 Uiso 1 1 calc R . .
C18 C 0.2643(2) 0.16317(16) 0.29744(12) 0.0241(5) Uani 1 1 d . . .
C19 C 0.3834(3) 0.18879(18) 0.34709(13) 0.0331(6) Uani 1 1 d . . .
C20 C 0.4391(3) 0.1428(2) 0.40581(14) 0.0427(8) Uani 1 1 d . . .
H20 H 0.5199 0.1595 0.4402 0.051 Uiso 1 1 calc R . .
C21 C 0.3797(3) 0.0740(2) 0.41493(15) 0.0441(8) Uani 1 1 d . . .
H21 H 0.4191 0.0437 0.4553 0.053 Uiso 1 1 calc R . .
C22 C 0.2637(3) 0.04932(18) 0.36559(15) 0.0393(7) Uani 1 1 d . . .
H22 H 0.2233 0.0015 0.3721 0.047 Uiso 1 1 calc R . .
C23 C 0.2033(3) 0.09262(16) 0.30591(13) 0.0283(6) Uani 1 1 d . . .
C24 C 0.4547(3) 0.2635(2) 0.33974(15) 0.0492(9) Uani 1 1 d . . .
H24 H 0.4013 0.2884 0.295 0.059 Uiso 1 1 calc R . .
C25 C 0.4784(5) 0.3334(3) 0.3908(2) 0.0930(16) Uani 1 1 d . . .
H25A H 0.5245 0.3807 0.385 0.139 Uiso 1 1 calc R . .
H25B H 0.5284 0.3099 0.4351 0.139 Uiso 1 1 calc R . .
H25C H 0.3972 0.3541 0.3847 0.139 Uiso 1 1 calc R . .
C26 C 0.5791(3) 0.2331(3) 0.3449(2) 0.0752(13) Uani 1 1 d . . .
H26A H 0.6236 0.2818 0.3395 0.113 Uiso 1 1 calc R . .
H26B H 0.561 0.1911 0.3104 0.113 Uiso 1 1 calc R . .
H26C H 0.6322 0.2071 0.388 0.113 Uiso 1 1 calc R . .
C27 C 0.0764(3) 0.06149(18) 0.25197(15) 0.0356(7) Uani 1 1 d . . .
H27 H 0.0462 0.1023 0.2144 0.043 Uiso 1 1 calc R . .
C28 C -0.0240(3) 0.0572(2) 0.27309(18) 0.0539(9) Uani 1 1 d . . .
H28A H -0.104 0.0374 0.2362 0.081 Uiso 1 1 calc R . .
H28B H -0.0359 0.114 0.2866 0.081 Uiso 1 1 calc R . .
H28C H 0.0035 0.0177 0.31 0.081 Uiso 1 1 calc R . .
C29 C 0.0943(3) -0.0249(2) 0.22823(18) 0.0519(9) Uani 1 1 d . . .
H29A H 0.0128 -0.0454 0.193 0.078 Uiso 1 1 calc R . .
H29B H 0.1279 -0.0654 0.2648 0.078 Uiso 1 1 calc R . .
H29C H 0.1539 -0.0194 0.2116 0.078 Uiso 1 1 calc R . .
C30 C 0.4928(3) 0.1211(2) 0.1165(2) 0.0633(11) Uani 1 1 d . . .
H30A H 0.4094 0.1181 0.077 0.095 Uiso 1 1 calc R . .
H30B H 0.4928 0.0864 0.1513 0.095 Uiso 1 1 calc R . .
H30C H 0.557 0.0996 0.1064 0.095 Uiso 1 1 calc R . .
C31 C 0.5450(3) 0.2980(3) 0.08165(18) 0.0584(10) Uani 1 1 d . . .
H31A H 0.4636 0.2992 0.0408 0.088 Uiso 1 1 calc R . .
H31B H 0.6091 0.272 0.0734 0.088 Uiso 1 1 calc R . .
H31C H 0.5705 0.3563 0.0978 0.088 Uiso 1 1 calc R . .
C32 C 0.6885(3) 0.2366(2) 0.21956(17) 0.0531(9) Uani 1 1 d . . .
H32A H 0.6864 0.2037 0.2546 0.08 Uiso 1 1 calc R . .
H32B H 0.7119 0.2956 0.234 0.08 Uiso 1 1 calc R . .
H32C H 0.7508 0.2116 0.2095 0.08 Uiso 1 1 calc R . .
C33 C 0.3148(3) 0.4755(2) 0.08469(17) 0.0577(9) Uani 1 1 d . . .
H33A H 0.2272 0.4574 0.056 0.087 Uiso 1 1 calc R . .
H33B H 0.3665 0.459 0.065 0.087 Uiso 1 1 calc R . .
H33C H 0.3175 0.5375 0.09 0.087 Uiso 1 1 calc R . .
C34 C 0.5430(3) 0.4619(2) 0.21929(18) 0.0566(10) Uani 1 1 d . . .
H34A H 0.5794 0.4353 0.2627 0.085 Uiso 1 1 calc R . .
H34B H 0.5427 0.5239 0.2239 0.085 Uiso 1 1 calc R . .
H34C H 0.5938 0.4467 0.1988 0.085 Uiso 1 1 calc R . .
C35 C 0.2807(4) 0.4601(2) 0.2035(2) 0.0654(11) Uani 1 1 d . . .
H35A H 0.3115 0.4333 0.2466 0.098 Uiso 1 1 calc R . .
H35B H 0.1922 0.4441 0.1746 0.098 Uiso 1 1 calc R . .
H35C H 0.2872 0.5221 0.2087 0.098 Uiso 1 1 calc R . .
 
loop_
    _atom_site_aniso_label
    _atom_site_aniso_U_11
    _atom_site_aniso_U_22
    _atom_site_aniso_U_33
    _atom_site_aniso_U_23
    _atom_site_aniso_U_13
    _atom_site_aniso_U_12
Sn 0.02132(9) 0.01979(9) 0.01828(9) -0.00143(7) 0.00977(7) 0.00080(7)
P 0.0349(4) 0.0273(4) 0.0622(5) -0.0022(4) 0.0337(4) -0.0028(3)
Si1 0.0254(4) 0.0395(4) 0.0363(5) -0.0001(4) 0.0173(4) 0.0020(3)
Si2 0.0309(4) 0.0267(4) 0.0458(5) 0.0007(3) 0.0198(4) -0.0025(3)
N1 0.0222(11) 0.0252(11) 0.0181(11) -0.0028(9) 0.0096(9) 0.0013(9)
N2 0.0278(11) 0.0198(10) 0.0163(10) 0.0000(8) 0.0108(9) -0.0004(9)
C1 0.0317(14) 0.0262(13) 0.0260(14) 0.0029(11) 0.0168(12) 0.0046(11)
C2 0.0478(17) 0.0226(13) 0.0261(15) 0.0024(11) 0.0195(14) 0.0123(12)
C3 0.0451(17) 0.0245(14) 0.0223(14) -0.0017(11) 0.0197(13) 0.0026(12)
C4 0.0431(17) 0.0441(18) 0.0324(16) 0.0061(14) 0.0163(14) 0.0216(14)
C5 0.080(3) 0.0486(19) 0.0288(17) 0.0029(14) 0.0284(17) 0.0337(18)
C6 0.0185(13) 0.0354(14) 0.0198(13) -0.0046(11) 0.0057(11) 0.0092(11)
C7 0.0259(14) 0.0485(17) 0.0209(14) -0.0017(12) 0.0105(12) 0.0116(13)
C8 0.0330(17) 0.082(2) 0.0207(15) -0.0059(16) 0.0096(13) 0.0144(17)
C9 0.0281(16) 0.086(3) 0.0265(17) -0.0247(17) 0.0033(14) 0.0109(17)
C10 0.0235(15) 0.0531(19) 0.0413(19) -0.0232(16) 0.0058(14) 0.0030(13)
C11 0.0170(13) 0.0371(16) 0.0306(15) -0.0113(12) 0.0054(12) 0.0051(11)
C12 0.0425(18) 0.0553(19) 0.0247(15) 0.0085(14) 0.0184(14) 0.0064(15)
C13 0.054(2) 0.089(3) 0.040(2) -0.0020(19) 0.0299(18) -0.005(2)
C14 0.075(3) 0.072(3) 0.048(2) 0.026(2) 0.029(2) 0.015(2)
C15 0.0210(14) 0.0355(16) 0.0442(18) -0.0071(13) 0.0091(13) -0.0042(12)
C16 0.0440(19) 0.053(2) 0.063(2) 0.0026(18) 0.0319(18) -0.0004(16)
C17 0.041(2) 0.044(2) 0.073(3) -0.0069(18) 0.0117(19) -0.0102(16)
C18 0.0309(14) 0.0275(13) 0.0179(12) 0.0013(11) 0.0151(11) 0.0059(11)
C19 0.0377(16) 0.0370(15) 0.0226(14) -0.0032(12) 0.0135(13) -0.0001(12)
C20 0.0425(18) 0.056(2) 0.0209(15) -0.0003(13) 0.0087(14) 0.0093(15)
C21 0.057(2) 0.0461(18) 0.0288(17) 0.0150(14) 0.0210(16) 0.0214(16)
C22 0.056(2) 0.0331(16) 0.0370(17) 0.0105(13) 0.0296(16) 0.0079(14)
C23 0.0392(16) 0.0277(14) 0.0266(14) 0.0031(11) 0.0228(13) 0.0051(12)
C24 0.050(2) 0.050(2) 0.0286(17) -0.0026(14) 0.0051(15) -0.0167(16)
C25 0.128(4) 0.067(3) 0.058(3) -0.026(2) 0.026(3) -0.042(3)
C26 0.043(2) 0.104(3) 0.062(3) 0.011(2) 0.014(2) -0.020(2)
C27 0.0433(17) 0.0341(16) 0.0375(17) 0.0031(13) 0.0262(15) -0.0071(13)
C28 0.048(2) 0.065(2) 0.066(2) 0.0108(19) 0.0411(19) 0.0053(17)
C29 0.058(2) 0.048(2) 0.063(2) -0.0107(17) 0.0394(19) -0.0158(17)
C30 0.053(2) 0.055(2) 0.097(3) -0.026(2) 0.048(2) -0.0027(18)
C31 0.047(2) 0.086(3) 0.059(2) 0.020(2) 0.0397(19) 0.0150(19)
C32 0.0326(17) 0.066(2) 0.052(2) -0.0015(18) 0.0144(16) 0.0099(16)
C33 0.060(2) 0.0408(19) 0.059(2) 0.0112(17) 0.0194(19) 0.0006(17)
C34 0.0435(19) 0.0411(19) 0.066(2) -0.0003(17) 0.0126(18) -0.0116(15)
C35 0.083(3) 0.0347(18) 0.110(3) -0.007(2) 0.071(3) 0.0007(18)
 
 
#----------------------------------------------------------------------------#
#                   MOLECULAR GEOMETRY                                       #
#----------------------------------------------------------------------------#
 
_geom_special_details
;
 All esds (except the esd in the dihedral angle between two l.s. planes)
 are estimated using the full covariance matrix.  The cell esds are taken
 into account individually in the estimation of esds in distances, angles
 and torsion angles; correlations between esds in cell parameters are only
 used when they are defined by crystal symmetry.  An approximate (isotropic)
 treatment of cell esds is used for estimating esds involving l.s. planes.
;
loop_
    _geom_bond_atom_site_label_1
    _geom_bond_atom_site_label_2
    _geom_bond_distance
    _geom_bond_site_symmetry_2
    _geom_bond_publ_flag
Sn N1 2.217(2) . ?
Sn N2 2.2210(19) . ?
Sn P 2.5526(7) . ?
P Si1 2.2166(10) . ?
P Si2 2.2215(11) . ?
Si1 C32 1.866(3) . ?
Si1 C31 1.868(3) . ?
Si1 C30 1.870(3) . ?
Si2 C34 1.861(3) . ?
Si2 C35 1.861(3) . ?
Si2 C33 1.873(3) . ?
N1 C1 1.331(3) . ?
N1 C6 1.448(3) . ?
N2 C3 1.324(3) . ?
N2 C18 1.452(3) . ?
C1 C2 1.397(4) . ?
C1 C4 1.514(4) . ?
C2 C3 1.404(4) . ?
C2 H2 0.95 . ?
C3 C5 1.516(4) . ?
C4 H4A 0.98 . ?
C4 H4B 0.98 . ?
C4 H4C 0.98 . ?
C5 H5A 0.98 . ?
C5 H5B 0.98 . ?
C5 H5C 0.98 . ?
C6 C7 1.405(4) . ?
C6 C11 1.413(4) . ?
C7 C8 1.394(4) . ?
C7 C12 1.514(4) . ?
C8 C9 1.370(5) . ?
C8 H8 0.95 . ?
C9 C10 1.373(5) . ?
C9 H9 0.95 . ?
C10 C11 1.397(4) . ?
C10 H10 0.95 . ?
C11 C15 1.516(4) . ?
C12 C13 1.532(4) . ?
C12 C14 1.538(4) . ?
C12 H12 1 . ?
C13 H13A 0.98 . ?
C13 H13B 0.98 . ?
C13 H13C 0.98 . ?
C14 H14A 0.98 . ?
C14 H14B 0.98 . ?
C14 H14C 0.98 . ?
C15 C17 1.528(4) . ?
C15 C16 1.532(4) . ?
C15 H15 1 . ?
C16 H16A 0.98 . ?
C16 H16B 0.98 . ?
C16 H16C 0.98 . ?
C17 H17A 0.98 . ?
C17 H17B 0.98 . ?
C17 H17C 0.98 . ?
C18 C19 1.396(4) . ?
C18 C23 1.401(4) . ?
C19 C20 1.397(4) . ?
C19 C24 1.518(4) . ?
C20 C21 1.373(4) . ?
C20 H20 0.95 . ?
C21 C22 1.366(4) . ?
C21 H21 0.95 . ?
C22 C23 1.393(4) . ?
C22 H22 0.95 . ?
C23 C27 1.514(4) . ?
C24 C26 1.533(5) . ?
C24 C25 1.542(5) . ?
C24 H24 1 . ?
C25 H25A 0.98 . ?
C25 H25B 0.98 . ?
C25 H25C 0.98 . ?
C26 H26A 0.98 . ?
C26 H26B 0.98 . ?
C26 H26C 0.98 . ?
C27 C29 1.522(4) . ?
C27 C28 1.527(4) . ?
C27 H27 1 . ?
C28 H28A 0.98 . ?
C28 H28B 0.98 . ?
C28 H28C 0.98 . ?
C29 H29A 0.98 . ?
C29 H29B 0.98 . ?
C29 H29C 0.98 . ?
C30 H30A 0.98 . ?
C30 H30B 0.98 . ?
C30 H30C 0.98 . ?
C31 H31A 0.98 . ?
C31 H31B 0.98 . ?
C31 H31C 0.98 . ?
C32 H32A 0.98 . ?
C32 H32B 0.98 . ?
C32 H32C 0.98 . ?
C33 H33A 0.98 . ?
C33 H33B 0.98 . ?
C33 H33C 0.98 . ?
C34 H34A 0.98 . ?
C34 H34B 0.98 . ?
C34 H34C 0.98 . ?
C35 H35A 0.98 . ?
C35 H35B 0.98 . ?
C35 H35C 0.98 . ?
 
loop_
    _geom_angle_atom_site_label_1
    _geom_angle_atom_site_label_2
    _geom_angle_atom_site_label_3
    _geom_angle
    _geom_angle_site_symmetry_1
    _geom_angle_site_symmetry_3
    _geom_angle_publ_flag
N1 Sn N2 85.17(7) . . ?
N1 Sn P 101.77(5) . . ?
N2 Sn P 95.55(5) . . ?
Si1 P Si2 111.32(4) . . ?
Si1 P Sn 111.29(4) . . ?
Si2 P Sn 136.45(4) . . ?
C32 Si1 C31 105.55(17) . . ?
C32 Si1 C30 107.77(17) . . ?
C31 Si1 C30 109.33(18) . . ?
C32 Si1 P 112.97(12) . . ?
C31 Si1 P 112.72(11) . . ?
C30 Si1 P 108.35(11) . . ?
C34 Si2 C35 108.67(18) . . ?
C34 Si2 C33 107.35(16) . . ?
C35 Si2 C33 107.81(18) . . ?
C34 Si2 P 109.46(11) . . ?
C35 Si2 P 109.98(11) . . ?
C33 Si2 P 113.44(12) . . ?
C1 N1 C6 119.2(2) . . ?
C1 N1 Sn 124.76(17) . . ?
C6 N1 Sn 115.96(14) . . ?
C3 N2 C18 117.9(2) . . ?
C3 N2 Sn 124.42(16) . . ?
C18 N2 Sn 117.48(14) . . ?
N1 C1 C2 124.0(2) . . ?
N1 C1 C4 120.3(2) . . ?
C2 C1 C4 115.7(2) . . ?
C1 C2 C3 129.9(2) . . ?
C1 C2 H2 115.1 . . ?
C3 C2 H2 115.1 . . ?
N2 C3 C2 125.1(2) . . ?
N2 C3 C5 119.7(2) . . ?
C2 C3 C5 115.1(2) . . ?
C1 C4 H4A 109.5 . . ?
C1 C4 H4B 109.5 . . ?
H4A C4 H4B 109.5 . . ?
C1 C4 H4C 109.5 . . ?
H4A C4 H4C 109.5 . . ?
H4B C4 H4C 109.5 . . ?
C3 C5 H5A 109.5 . . ?
C3 C5 H5B 109.5 . . ?
H5A C5 H5B 109.5 . . ?
C3 C5 H5C 109.5 . . ?
H5A C5 H5C 109.5 . . ?
H5B C5 H5C 109.5 . . ?
C7 C6 C11 121.2(2) . . ?
C7 C6 N1 120.5(2) . . ?
C11 C6 N1 118.3(2) . . ?
C8 C7 C6 118.1(3) . . ?
C8 C7 C12 118.3(3) . . ?
C6 C7 C12 123.6(2) . . ?
C9 C8 C7 121.4(3) . . ?
C9 C8 H8 119.3 . . ?
C7 C8 H8 119.3 . . ?
C8 C9 C10 120.2(3) . . ?
C8 C9 H9 119.9 . . ?
C10 C9 H9 119.9 . . ?
C9 C10 C11 121.6(3) . . ?
C9 C10 H10 119.2 . . ?
C11 C10 H10 119.2 . . ?
C10 C11 C6 117.6(3) . . ?
C10 C11 C15 120.3(3) . . ?
C6 C11 C15 122.2(2) . . ?
C7 C12 C13 109.9(3) . . ?
C7 C12 C14 112.0(3) . . ?
C13 C12 C14 110.5(3) . . ?
C7 C12 H12 108.1 . . ?
C13 C12 H12 108.1 . . ?
C14 C12 H12 108.1 . . ?
C12 C13 H13A 109.5 . . ?
C12 C13 H13B 109.5 . . ?
H13A C13 H13B 109.5 . . ?
C12 C13 H13C 109.5 . . ?
H13A C13 H13C 109.5 . . ?
H13B C13 H13C 109.5 . . ?
C12 C14 H14A 109.5 . . ?
C12 C14 H14B 109.5 . . ?
H14A C14 H14B 109.5 . . ?
C12 C14 H14C 109.5 . . ?
H14A C14 H14C 109.5 . . ?
H14B C14 H14C 109.5 . . ?
C11 C15 C17 113.2(3) . . ?
C11 C15 C16 112.3(2) . . ?
C17 C15 C16 108.9(3) . . ?
C11 C15 H15 107.4 . . ?
C17 C15 H15 107.4 . . ?
C16 C15 H15 107.4 . . ?
C15 C16 H16A 109.5 . . ?
C15 C16 H16B 109.5 . . ?
H16A C16 H16B 109.5 . . ?
C15 C16 H16C 109.5 . . ?
H16A C16 H16C 109.5 . . ?
H16B C16 H16C 109.5 . . ?
C15 C17 H17A 109.5 . . ?
C15 C17 H17B 109.5 . . ?
H17A C17 H17B 109.5 . . ?
C15 C17 H17C 109.5 . . ?
H17A C17 H17C 109.5 . . ?
H17B C17 H17C 109.5 . . ?
C19 C18 C23 121.0(2) . . ?
C19 C18 N2 121.1(2) . . ?
C23 C18 N2 117.9(2) . . ?
C18 C19 C20 118.0(3) . . ?
C18 C19 C24 123.0(2) . . ?
C20 C19 C24 119.0(3) . . ?
C21 C20 C19 121.5(3) . . ?
C21 C20 H20 119.2 . . ?
C19 C20 H20 119.2 . . ?
C22 C21 C20 119.6(3) . . ?
C22 C21 H21 120.2 . . ?
C20 C21 H21 120.2 . . ?
C21 C22 C23 121.5(3) . . ?
C21 C22 H22 119.2 . . ?
C23 C22 H22 119.2 . . ?
C22 C23 C18 118.3(3) . . ?
C22 C23 C27 119.6(2) . . ?
C18 C23 C27 122.0(2) . . ?
C19 C24 C26 110.3(3) . . ?
C19 C24 C25 111.2(3) . . ?
C26 C24 C25 111.2(3) . . ?
C19 C24 H24 108 . . ?
C26 C24 H24 108 . . ?
C25 C24 H24 108 . . ?
C24 C25 H25A 109.5 . . ?
C24 C25 H25B 109.5 . . ?
H25A C25 H25B 109.5 . . ?
C24 C25 H25C 109.5 . . ?
H25A C25 H25C 109.5 . . ?
H25B C25 H25C 109.5 . . ?
C24 C26 H26A 109.5 . . ?
C24 C26 H26B 109.5 . . ?
H26A C26 H26B 109.5 . . ?
C24 C26 H26C 109.5 . . ?
H26A C26 H26C 109.5 . . ?
H26B C26 H26C 109.5 . . ?
C23 C27 C29 108.8(2) . . ?
C23 C27 C28 113.1(3) . . ?
C29 C27 C28 111.1(2) . . ?
C23 C27 H27 107.9 . . ?
C29 C27 H27 107.9 . . ?
C28 C27 H27 107.9 . . ?
C27 C28 H28A 109.5 . . ?
C27 C28 H28B 109.5 . . ?
H28A C28 H28B 109.5 . . ?
C27 C28 H28C 109.5 . . ?
H28A C28 H28C 109.5 . . ?
H28B C28 H28C 109.5 . . ?
C27 C29 H29A 109.5 . . ?
C27 C29 H29B 109.5 . . ?
H29A C29 H29B 109.5 . . ?
C27 C29 H29C 109.5 . . ?
H29A C29 H29C 109.5 . . ?
H29B C29 H29C 109.5 . . ?
Si1 C30 H30A 109.5 . . ?
Si1 C30 H30B 109.5 . . ?
H30A C30 H30B 109.5 . . ?
Si1 C30 H30C 109.5 . . ?
H30A C30 H30C 109.5 . . ?
H30B C30 H30C 109.5 . . ?
Si1 C31 H31A 109.5 . . ?
Si1 C31 H31B 109.5 . . ?
H31A C31 H31B 109.5 . . ?
Si1 C31 H31C 109.5 . . ?
H31A C31 H31C 109.5 . . ?
H31B C31 H31C 109.5 . . ?
Si1 C32 H32A 109.5 . . ?
Si1 C32 H32B 109.5 . . ?
H32A C32 H32B 109.5 . . ?
Si1 C32 H32C 109.5 . . ?
H32A C32 H32C 109.5 . . ?
H32B C32 H32C 109.5 . . ?
Si2 C33 H33A 109.5 . . ?
Si2 C33 H33B 109.5 . . ?
H33A C33 H33B 109.5 . . ?
Si2 C33 H33C 109.5 . . ?
H33A C33 H33C 109.5 . . ?
H33B C33 H33C 109.5 . . ?
Si2 C34 H34A 109.5 . . ?
Si2 C34 H34B 109.5 . . ?
H34A C34 H34B 109.5 . . ?
Si2 C34 H34C 109.5 . . ?
H34A C34 H34C 109.5 . . ?
H34B C34 H34C 109.5 . . ?
Si2 C35 H35A 109.5 . . ?
Si2 C35 H35B 109.5 . . ?
H35A C35 H35B 109.5 . . ?
Si2 C35 H35C 109.5 . . ?
H35A C35 H35C 109.5 . . ?
H35B C35 H35C 109.5 . . ?
 
#===END

data_(3a)-jun1710
 
_audit_creation_date            2010-06-29T13:43:06-00:00
_audit_creation_method         'WinGX routine CIF_UPDATE'
_audit_conform_dict_name        cif_core.dic
_audit_conform_dict_version     2.2
_audit_conform_dict_location    ftp://ftp.iucr.org/pub/cif_core.dic
_publ_requested_category        FM
 
#----------------------------------------------------------------------------#
#                   CHEMICAL INFORMATION                                     #
#----------------------------------------------------------------------------#
 
_chemical_name_systematic
;
 ?
;
_chemical_formula_moiety                'C41 H51 N2 P Pb'
_chemical_formula_sum                   'C41 H51 N2 P Pb'
_chemical_formula_weight                810.01
_chemical_compound_source               'synthesis as described'
_chemical_absolute_configuration        ad
 
#----------------------------------------------------------------------------#
#                   UNIT CELL INFORMATION                                    #
#----------------------------------------------------------------------------#
 
_symmetry_cell_setting                  orthorhombic
_symmetry_space_group_name_H-M          'I 2 c b'
_symmetry_space_group_name_Hall         'I -2a 2'
_symmetry_Int_Tables_number             45
loop_
    _symmetry_equiv_pos_as_xyz
'x, y, z'
'x+1/2, y, -z'
'x, -y, -z'
'x+1/2, -y, z'
'x+1/2, y+1/2, z+1/2'
'x+1, y+1/2, -z+1/2'
'x+1/2, -y+1/2, -z+1/2'
'x+1, -y+1/2, z+1/2'
 
_cell_length_a                          15.9697(5)
_cell_length_b                          18.3168(6)
_cell_length_c                          25.8355(6)
_cell_angle_alpha                       90
_cell_angle_beta                        90
_cell_angle_gamma                       90
_cell_volume                            7557.2(4)
_cell_formula_units_Z                   8
_cell_measurement_temperature           173(2)
_cell_measurement_reflns_used           13590
_cell_measurement_theta_min             3.395
_cell_measurement_theta_max             27.103
_cell_measurement_wavelength            0.71073
 
#----------------------------------------------------------------------------#
#                   CRYSTAL INFORMATION                                      #
#----------------------------------------------------------------------------#
 
_exptl_crystal_description              prism
_exptl_crystal_colour                   red
_exptl_crystal_size_max                 0.15
_exptl_crystal_size_mid                 0.07
_exptl_crystal_size_min                 0.03
_exptl_crystal_density_diffrn           1.424
_exptl_crystal_density_method           'not measured'
_exptl_crystal_F_000                    3264
_exptl_special_details
;
 ?
;
 
#----------------------------------------------------------------------------#
#                   ABSORPTION CORRECTION                                    #
#----------------------------------------------------------------------------#
 
_exptl_absorpt_coefficient_mu           4.536
_exptl_absorpt_correction_type          multi-scan
_exptl_absorpt_process_details
;
        [c.f. r.h. blessing, acta cryst. (1995), a51, 33-38]
;
_exptl_absorpt_correction_T_min         0.6155
_exptl_absorpt_correction_T_max         0.7662
 
#----------------------------------------------------------------------------#
#                   DATA COLLECTION                                          #
#----------------------------------------------------------------------------#
 
_diffrn_source                          'Enraf Nonius FR590'
_diffrn_ambient_temperature             173(2)
_diffrn_radiation_wavelength            0.7107
_diffrn_radiation_type                  MoK\a
_diffrn_radiation_monochromator         graphite
_diffrn_radiation_probe                 x-ray
_diffrn_detector                        'CCD plate'
_diffrn_orient_matrix_type              'by Nonius Collect from scalepack cell'
_diffrn_orient_matrix_ub_11             0.29775E-2
_diffrn_orient_matrix_ub_12             0.310654E-1
_diffrn_orient_matrix_ub_13             -0.31776E-1
_diffrn_orient_matrix_ub_21             0.624616E-1
_diffrn_orient_matrix_ub_22             0.8776E-3
_diffrn_orient_matrix_ub_23             0.26675E-2
_diffrn_orient_matrix_ub_31             0.32819E-2
_diffrn_orient_matrix_ub_32             -0.448859E-1
_diffrn_orient_matrix_ub_33             -0.219399E-1
_diffrn_measurement_device              '95mm CCD camera on \k-goniostat'
_diffrn_measurement_device_type         KappaCCD
_diffrn_measurement_method              'CCD rotation images, thick slices'
_diffrn_reflns_av_R_equivalents         0.0811
_diffrn_reflns_av_unetI/netI            0.0957
_diffrn_reflns_number                   24237
_diffrn_reflns_limit_h_min              -20
_diffrn_reflns_limit_h_max              20
_diffrn_reflns_limit_k_min              -23
_diffrn_reflns_limit_k_max              17
_diffrn_reflns_limit_l_min              -32
_diffrn_reflns_limit_l_max              33
_diffrn_reflns_theta_min                3.43
_diffrn_reflns_theta_max                27.09
_diffrn_reflns_theta_full               27.09
_diffrn_measured_fraction_theta_full
                                        0.997
_diffrn_measured_fraction_theta_max
                                        0.997
_reflns_number_total                    8198
_reflns_number_gt                       5814
_reflns_threshold_expression            >2sigma(I)
 
#----------------------------------------------------------------------------#
#                   COMPUTER PROGRAMS USED                                   #
#----------------------------------------------------------------------------#
 
_computing_data_collection              'Collect (Nonius BV, 1997-2000)'
_computing_cell_refinement
                                       'HKL Scalepack (Otwinowski & Minor 1997)'
_computing_data_reduction
                             'HKL Denzo and Scalepack (Otwinowski & Minor 1997)'
_computing_structure_solution           'SHELXS-97 (Sheldrick, 1997)'
_computing_structure_refinement         'SHELXL-97 (Sheldrick, 1997)'
_computing_molecular_graphics           'Ortep-3 for Windows (Farrugia, 1997)'
_computing_publication_material
                                   'WinGX publication routines (Farrugia, 1999)'
 
#----------------------------------------------------------------------------#
#                   REFINEMENT INFORMATION                                   #
#----------------------------------------------------------------------------#
 
_refine_special_details
;
 Refinement of F^2^ against ALL reflections.  The weighted R-factor wR and
 goodness of fit S are based on F^2^, conventional R-factors R are based
 on F, with F set to zero for negative F^2^. The threshold expression of
 F^2^ > 2sigma(F^2^) is used only for calculating R-factors(gt) etc. and is
 not relevant to the choice of reflections for refinement.  R-factors based
 on F^2^ are statistically about twice as large as those based on F, and R-
 factors based on ALL data will be even larger.
;
_refine_ls_structure_factor_coef        Fsqd
_refine_ls_matrix_type                  full
_refine_ls_weighting_scheme             calc
_refine_ls_weighting_details
         'calc w=1/[\s^2^(Fo^2^)+(0.0423P)^2^+1.1846P] where P=(Fo^2^+2Fc^2^)/3'
_atom_sites_solution_primary            direct
_atom_sites_solution_secondary          difmap
_atom_sites_solution_hydrogens          geom
_refine_ls_hydrogen_treatment           constr
_refine_ls_extinction_method            none
_refine_ls_number_reflns                8198
_refine_ls_number_parameters            408
_refine_ls_number_restraints            1
_refine_ls_R_factor_all                 0.0863
_refine_ls_R_factor_gt                  0.0468
_refine_ls_wR_factor_ref                0.0958
_refine_ls_wR_factor_gt                 0.0847
_refine_ls_goodness_of_fit_ref          0.986
_refine_ls_restrained_S_all             0.986
_refine_ls_shift/su_max                 0.001
_refine_ls_shift/su_mean                0
_refine_ls_abs_structure_details
                                    'Flack H D (1983), Acta Cryst. A39, 876-881'
_refine_ls_abs_structure_Flack          -0.006(8)
_refine_diff_density_max                0.676
_refine_diff_density_min                -1.395
_refine_diff_density_rms                0.131
 
#----------------------------------------------------------------------------#
#                   ATOMIC TYPES, COORDINATES AND THERMAL PARAMETERS         #
#----------------------------------------------------------------------------#
 
loop_
    _atom_type_symbol
    _atom_type_description
    _atom_type_scat_dispersion_real
    _atom_type_scat_dispersion_imag
    _atom_type_scat_source
C C 0.0033 0.0016 'International Tables Vol C Tables 4.2.6.8 and 6.1.1.4'
H H 0 0 'International Tables Vol C Tables 4.2.6.8 and 6.1.1.4'
N N 0.0061 0.0033 'International Tables Vol C Tables 4.2.6.8 and 6.1.1.4'
P P 0.1023 0.0942 'International Tables Vol C Tables 4.2.6.8 and 6.1.1.4'
Pb Pb -3.3944 10.1111 'International Tables Vol C Tables 4.2.6.8 and 6.1.1.4'
 
loop_
    _atom_site_label
    _atom_site_type_symbol
    _atom_site_fract_x
    _atom_site_fract_y
    _atom_site_fract_z
    _atom_site_U_iso_or_equiv
    _atom_site_adp_type
    _atom_site_occupancy
    _atom_site_symmetry_multiplicity
    _atom_site_calc_flag
    _atom_site_refinement_flags
    _atom_site_disorder_assembly
    _atom_site_disorder_group
Pb Pb 0.89776(3) 0.221220(13) 0.404084(8) 0.02223(8) Uani 1 1 d . . .
P P 1.01883(14) 0.20216(12) 0.33129(8) 0.0266(5) Uani 1 1 d . . .
N1 N 0.8556(4) 0.3380(4) 0.3805(2) 0.0200(14) Uani 1 1 d . . .
N2 N 0.9600(4) 0.2890(4) 0.4709(2) 0.0224(15) Uani 1 1 d . . .
C1 C 0.8340(5) 0.3861(5) 0.4152(3) 0.029(2) Uani 1 1 d . . .
C2 C 0.8598(5) 0.3868(5) 0.4675(3) 0.0283(19) Uani 1 1 d . . .
H2 H 0.831 0.4201 0.4894 0.034 Uiso 1 1 calc R . .
C3 C 0.9226(4) 0.3447(5) 0.4916(3) 0.0219(19) Uani 1 1 d . . .
C4 C 0.7785(6) 0.4502(5) 0.3989(3) 0.041(2) Uani 1 1 d . . .
H4A H 0.7894 0.4621 0.3625 0.062 Uiso 1 1 calc R . .
H4B H 0.7912 0.4927 0.4205 0.062 Uiso 1 1 calc R . .
H4C H 0.7195 0.4368 0.4031 0.062 Uiso 1 1 calc R . .
C5 C 0.9460(5) 0.3706(6) 0.5458(3) 0.041(3) Uani 1 1 d . . .
H5A H 1.0036 0.356 0.5536 0.062 Uiso 1 1 calc R . .
H5B H 0.9079 0.3486 0.5711 0.062 Uiso 1 1 calc R . .
H5C H 0.9413 0.4239 0.5475 0.062 Uiso 1 1 calc R . .
C6 C 0.8371(5) 0.3499(5) 0.3263(3) 0.0229(18) Uani 1 1 d . . .
C7 C 0.8972(9) 0.3830(4) 0.2951(2) 0.0287(15) Uani 1 1 d . . .
C8 C 0.8800(6) 0.3940(5) 0.2428(3) 0.039(3) Uani 1 1 d . . .
H8 H 0.9204 0.4166 0.221 0.047 Uiso 1 1 calc R . .
C9 C 0.8050(7) 0.3721(5) 0.2229(3) 0.043(3) Uani 1 1 d . . .
H9 H 0.7934 0.3802 0.1873 0.052 Uiso 1 1 calc R . .
C10 C 0.7462(5) 0.3389(5) 0.2531(3) 0.034(2) Uani 1 1 d . . .
H10 H 0.6947 0.3237 0.2381 0.041 Uiso 1 1 calc R . .
C11 C 0.7606(5) 0.3267(5) 0.3060(3) 0.0267(19) Uani 1 1 d . . .
C12 C 0.9819(5) 0.4072(5) 0.3178(3) 0.033(2) Uani 1 1 d . . .
H12 H 0.9937 0.3755 0.3484 0.04 Uiso 1 1 calc R . .
C13 C 0.9775(6) 0.4865(6) 0.3370(4) 0.059(3) Uani 1 1 d . . .
H13A H 0.9311 0.4915 0.3616 0.089 Uiso 1 1 calc R . .
H13B H 0.9683 0.5192 0.3075 0.089 Uiso 1 1 calc R . .
H13C H 1.0302 0.4993 0.3542 0.089 Uiso 1 1 calc R . .
C14 C 1.0549(5) 0.3995(6) 0.2808(4) 0.060(3) Uani 1 1 d . . .
H14A H 1.0581 0.349 0.2684 0.09 Uiso 1 1 calc R . .
H14B H 1.107 0.4122 0.2988 0.09 Uiso 1 1 calc R . .
H14C H 1.0469 0.4324 0.2513 0.09 Uiso 1 1 calc R . .
C15 C 0.6939(5) 0.2881(5) 0.3381(3) 0.032(2) Uani 1 1 d . . .
H15 H 0.7137 0.2865 0.3748 0.039 Uiso 1 1 calc R . .
C16 C 0.6089(6) 0.3292(7) 0.3368(4) 0.056(3) Uani 1 1 d . . .
H16A H 0.617 0.3794 0.349 0.083 Uiso 1 1 calc R . .
H16B H 0.5688 0.3043 0.3594 0.083 Uiso 1 1 calc R . .
H16C H 0.5873 0.33 0.3013 0.083 Uiso 1 1 calc R . .
C17 C 0.6821(7) 0.2108(5) 0.3200(3) 0.045(3) Uani 1 1 d . . .
H17A H 0.6393 0.187 0.3413 0.067 Uiso 1 1 calc R . .
H17B H 0.7351 0.1842 0.3232 0.067 Uiso 1 1 calc R . .
H17C H 0.6641 0.2108 0.2837 0.067 Uiso 1 1 calc R . .
C18 C 1.0298(5) 0.2542(5) 0.4959(3) 0.0247(18) Uani 1 1 d . . .
C19 C 1.1114(5) 0.2780(5) 0.4813(3) 0.028(2) Uani 1 1 d . . .
C20 C 1.1790(6) 0.2447(6) 0.5036(4) 0.037(3) Uani 1 1 d . . .
H20 H 1.2341 0.2605 0.4955 0.044 Uiso 1 1 calc R . .
C21 C 1.1668(6) 0.1872(6) 0.5384(3) 0.043(3) Uani 1 1 d . . .
H21 H 1.2139 0.1647 0.5542 0.052 Uiso 1 1 calc R . .
C22 C 1.0882(6) 0.1627(6) 0.5500(3) 0.039(2) Uani 1 1 d . . .
H22 H 1.0814 0.122 0.5724 0.046 Uiso 1 1 calc R . .
C23 C 1.0187(5) 0.1966(5) 0.5296(3) 0.030(2) Uani 1 1 d . . .
C24 C 1.1221(5) 0.3369(6) 0.4402(3) 0.042(2) Uani 1 1 d . . .
H24 H 1.0719 0.3353 0.4171 0.05 Uiso 1 1 calc R . .
C25 C 1.1259(7) 0.4111(6) 0.4637(4) 0.065(3) Uani 1 1 d . . .
H25A H 1.1324 0.4476 0.4363 0.097 Uiso 1 1 calc R . .
H25B H 1.1738 0.4138 0.4874 0.097 Uiso 1 1 calc R . .
H25C H 1.0741 0.4205 0.4829 0.097 Uiso 1 1 calc R . .
C26 C 1.1992(7) 0.3235(8) 0.4066(4) 0.070(4) Uani 1 1 d . . .
H26A H 1.1959 0.2747 0.3912 0.105 Uiso 1 1 calc R . .
H26B H 1.2498 0.327 0.428 0.105 Uiso 1 1 calc R . .
H26C H 1.2016 0.3602 0.3791 0.105 Uiso 1 1 calc R . .
C27 C 0.9307(5) 0.1685(7) 0.5441(3) 0.049(3) Uani 1 1 d . . .
H27 H 0.8885 0.2002 0.5264 0.059 Uiso 1 1 calc R . .
C28 C 0.9155(8) 0.1735(8) 0.6026(3) 0.087(5) Uani 1 1 d . . .
H28A H 0.8587 0.1565 0.6106 0.13 Uiso 1 1 calc R . .
H28B H 0.9216 0.2243 0.6139 0.13 Uiso 1 1 calc R . .
H28C H 0.9563 0.1429 0.6208 0.13 Uiso 1 1 calc R . .
C29 C 0.9177(8) 0.0902(6) 0.5254(4) 0.071(4) Uani 1 1 d . . .
H29A H 0.8609 0.0742 0.5342 0.107 Uiso 1 1 calc R . .
H29B H 0.9586 0.0581 0.5423 0.107 Uiso 1 1 calc R . .
H29C H 0.9254 0.0881 0.4878 0.107 Uiso 1 1 calc R . .
C30 C 0.9371(5) 0.1624(5) 0.2894(3) 0.0266(18) Uani 1 1 d . . .
C31 C 0.8930(9) 0.0982(4) 0.3007(3) 0.0291(17) Uani 1 1 d . . .
H31 H 0.9057 0.0718 0.3314 0.035 Uiso 1 1 calc R . .
C32 C 0.8317(5) 0.0729(5) 0.2681(4) 0.039(2) Uani 1 1 d . . .
H32 H 0.8032 0.0287 0.2757 0.047 Uiso 1 1 calc R . .
C33 C 0.8115(6) 0.1122(6) 0.2241(4) 0.045(3) Uani 1 1 d . . .
H33 H 0.7688 0.0948 0.2016 0.054 Uiso 1 1 calc R . .
C34 C 0.8525(6) 0.1760(6) 0.2127(3) 0.044(2) Uani 1 1 d . . .
H34 H 0.8373 0.2031 0.1828 0.052 Uiso 1 1 calc R . .
C35 C 0.9152(6) 0.2005(5) 0.2442(3) 0.035(3) Uani 1 1 d . . .
H35 H 0.9444 0.2439 0.2355 0.042 Uiso 1 1 calc R . .
C36 C 1.0704(5) 0.1204(5) 0.3553(3) 0.029(2) Uani 1 1 d . . .
C37 C 1.0902(5) 0.0610(5) 0.3225(3) 0.036(2) Uani 1 1 d . . .
H37 H 1.0675 0.0599 0.2885 0.043 Uiso 1 1 calc R . .
C38 C 1.1403(8) 0.0057(8) 0.3380(3) 0.035(2) Uani 1 1 d . . .
H38 H 1.1535 -0.0321 0.3143 0.043 Uiso 1 1 calc R . .
C39 C 1.1723(5) 0.0028(6) 0.3867(3) 0.043(3) Uani 1 1 d . . .
H39 H 1.2063 -0.0371 0.3971 0.052 Uiso 1 1 calc R . .
C40 C 1.1549(6) 0.0586(6) 0.4207(4) 0.049(3) Uani 1 1 d . . .
H40 H 1.1771 0.0576 0.4548 0.059 Uiso 1 1 calc R . .
C41 C 1.1053(6) 0.1157(6) 0.4052(3) 0.042(2) Uani 1 1 d . . .
H41 H 1.094 0.1538 0.4292 0.05 Uiso 1 1 calc R . .
 
loop_
    _atom_site_aniso_label
    _atom_site_aniso_U_11
    _atom_site_aniso_U_22
    _atom_site_aniso_U_33
    _atom_site_aniso_U_23
    _atom_site_aniso_U_13
    _atom_site_aniso_U_12
Pb 0.02046(12) 0.02352(13) 0.02271(12) -0.00141(12) 0.0001(3) -0.0004(3)
P 0.0265(12) 0.0234(13) 0.0300(11) -0.0032(9) 0.0038(10) 0.0004(9)
N1 0.016(3) 0.017(4) 0.027(3) -0.002(3) -0.005(3) 0.000(3)
N2 0.016(3) 0.037(5) 0.015(3) 0.004(3) 0.001(2) 0.001(3)
C1 0.017(4) 0.032(5) 0.038(5) 0.000(4) -0.002(3) -0.003(4)
C2 0.027(4) 0.031(5) 0.027(4) -0.011(4) 0.006(4) 0.001(4)
C3 0.015(4) 0.027(5) 0.024(4) -0.012(4) 0.000(3) 0.001(3)
C4 0.048(6) 0.033(6) 0.043(5) -0.012(5) -0.005(4) 0.014(5)
C5 0.028(5) 0.066(7) 0.029(4) -0.016(5) -0.012(4) 0.013(5)
C6 0.025(4) 0.030(5) 0.014(4) 0.008(3) 0.001(3) 0.010(4)
C7 0.033(4) 0.019(4) 0.033(4) 0.002(3) -0.003(7) 0.013(8)
C8 0.044(9) 0.040(5) 0.034(4) -0.001(4) 0.015(5) 0.009(5)
C9 0.071(7) 0.036(6) 0.023(5) 0.001(4) 0.006(5) 0.023(5)
C10 0.034(5) 0.050(6) 0.019(4) -0.003(4) 0.000(4) 0.011(5)
C11 0.026(4) 0.023(5) 0.031(4) 0.001(4) 0.001(4) 0.010(4)
C12 0.028(5) 0.030(6) 0.042(5) 0.016(4) 0.007(4) -0.006(4)
C13 0.044(6) 0.046(7) 0.088(8) -0.012(6) -0.012(6) -0.008(5)
C14 0.028(5) 0.061(8) 0.091(8) 0.011(7) 0.027(5) -0.005(5)
C15 0.030(5) 0.045(6) 0.022(4) -0.006(4) 0.003(3) 0.003(4)
C16 0.022(5) 0.078(8) 0.066(6) -0.012(6) 0.004(5) 0.016(5)
C17 0.054(6) 0.040(7) 0.040(5) -0.007(5) 0.015(5) -0.007(5)
C18 0.018(4) 0.034(5) 0.021(4) -0.008(4) -0.007(3) 0.001(4)
C19 0.021(4) 0.045(6) 0.018(4) 0.002(4) -0.010(4) -0.009(5)
C20 0.027(5) 0.054(7) 0.028(5) -0.009(5) -0.001(4) -0.011(5)
C21 0.034(5) 0.056(7) 0.040(5) -0.004(5) -0.014(5) 0.013(5)
C22 0.044(6) 0.039(6) 0.034(5) 0.007(4) -0.013(4) -0.002(5)
C23 0.032(5) 0.035(5) 0.022(4) 0.001(4) -0.009(4) -0.004(4)
C24 0.031(5) 0.050(7) 0.044(5) 0.013(5) -0.001(4) -0.014(5)
C25 0.061(7) 0.042(7) 0.092(9) 0.021(6) 0.013(6) -0.006(6)
C26 0.063(7) 0.100(11) 0.047(6) 0.006(6) 0.014(6) -0.019(7)
C27 0.032(5) 0.069(8) 0.045(5) 0.020(5) 0.001(4) -0.008(5)
C28 0.061(12) 0.145(12) 0.054(6) 0.037(7) 0.020(6) -0.020(9)
C29 0.069(11) 0.061(7) 0.084(7) 0.038(6) -0.006(7) -0.033(7)
C30 0.026(4) 0.026(5) 0.028(4) -0.005(4) -0.003(3) 0.014(4)
C31 0.023(4) 0.026(4) 0.038(4) -0.004(3) 0.002(6) 0.008(6)
C32 0.029(5) 0.029(6) 0.059(6) -0.007(5) 0.005(4) 0.001(4)
C33 0.032(5) 0.048(7) 0.055(6) -0.022(5) -0.012(5) 0.016(5)
C34 0.053(6) 0.053(7) 0.025(4) 0.001(5) -0.003(5) 0.016(6)
C35 0.034(8) 0.037(5) 0.034(4) -0.005(4) 0.001(4) 0.005(4)
C36 0.025(5) 0.028(5) 0.035(5) -0.004(4) 0.008(4) -0.001(4)
C37 0.032(5) 0.036(6) 0.040(5) -0.001(4) 0.006(4) -0.002(4)
C38 0.037(5) 0.027(5) 0.042(4) 0.002(6) 0.003(6) 0.007(4)
C39 0.043(7) 0.027(5) 0.059(5) 0.009(5) 0.001(4) 0.015(6)
C40 0.049(6) 0.058(8) 0.040(5) -0.002(5) -0.024(5) 0.020(6)
C41 0.046(6) 0.047(6) 0.032(5) -0.013(5) -0.003(5) 0.016(5)
 
 
#----------------------------------------------------------------------------#
#                   MOLECULAR GEOMETRY                                       #
#----------------------------------------------------------------------------#
 
_geom_special_details
;
 All esds (except the esd in the dihedral angle between two l.s. planes)
 are estimated using the full covariance matrix.  The cell esds are taken
 into account individually in the estimation of esds in distances, angles
 and torsion angles; correlations between esds in cell parameters are only
 used when they are defined by crystal symmetry.  An approximate (isotropic)
 treatment of cell esds is used for estimating esds involving l.s. planes.
;
loop_
    _geom_bond_atom_site_label_1
    _geom_bond_atom_site_label_2
    _geom_bond_distance
    _geom_bond_site_symmetry_2
    _geom_bond_publ_flag
Pb N1 2.324(6) . ?
Pb N2 2.347(6) . ?
Pb P 2.720(2) . ?
P C36 1.818(9) . ?
P C30 1.845(8) . ?
N1 C1 1.303(10) . ?
N1 C6 1.446(9) . ?
N2 C3 1.297(9) . ?
N2 C18 1.436(10) . ?
C1 C2 1.413(11) . ?
C1 C4 1.530(12) . ?
C2 C3 1.410(10) . ?
C2 H2 0.95 . ?
C3 C5 1.526(10) . ?
C4 H4A 0.98 . ?
C4 H4B 0.98 . ?
C4 H4C 0.98 . ?
C5 H5A 0.98 . ?
C5 H5B 0.98 . ?
C5 H5C 0.98 . ?
C6 C7 1.394(14) . ?
C6 C11 1.395(11) . ?
C7 C8 1.395(10) . ?
C7 C12 1.538(16) . ?
C8 C9 1.364(14) . ?
C8 H8 0.95 . ?
C9 C10 1.363(12) . ?
C9 H9 0.95 . ?
C10 C11 1.404(10) . ?
C10 H10 0.95 . ?
C11 C15 1.523(11) . ?
C12 C14 1.514(11) . ?
C12 C13 1.537(13) . ?
C12 H12 1 . ?
C13 H13A 0.98 . ?
C13 H13B 0.98 . ?
C13 H13C 0.98 . ?
C14 H14A 0.98 . ?
C14 H14B 0.98 . ?
C14 H14C 0.98 . ?
C15 C17 1.502(12) . ?
C15 C16 1.553(12) . ?
C15 H15 1 . ?
C16 H16A 0.98 . ?
C16 H16B 0.98 . ?
C16 H16C 0.98 . ?
C17 H17A 0.98 . ?
C17 H17B 0.98 . ?
C17 H17C 0.98 . ?
C18 C23 1.379(12) . ?
C18 C19 1.425(11) . ?
C19 C20 1.367(12) . ?
C19 C24 1.524(13) . ?
C20 C21 1.398(14) . ?
C20 H20 0.95 . ?
C21 C22 1.367(13) . ?
C21 H21 0.95 . ?
C22 C23 1.377(11) . ?
C22 H22 0.95 . ?
C23 C27 1.543(12) . ?
C24 C25 1.489(14) . ?
C24 C26 1.526(13) . ?
C24 H24 1 . ?
C25 H25A 0.98 . ?
C25 H25B 0.98 . ?
C25 H25C 0.98 . ?
C26 H26A 0.98 . ?
C26 H26B 0.98 . ?
C26 H26C 0.98 . ?
C27 C29 1.527(15) . ?
C27 C28 1.535(11) . ?
C27 H27 1 . ?
C28 H28A 0.98 . ?
C28 H28B 0.98 . ?
C28 H28C 0.98 . ?
C29 H29A 0.98 . ?
C29 H29B 0.98 . ?
C29 H29C 0.98 . ?
C30 C31 1.402(12) . ?
C30 C35 1.403(11) . ?
C31 C32 1.372(14) . ?
C31 H31 0.95 . ?
C32 C33 1.383(13) . ?
C32 H32 0.95 . ?
C33 C34 1.372(14) . ?
C33 H33 0.95 . ?
C34 C35 1.367(12) . ?
C34 H34 0.95 . ?
C35 H35 0.95 . ?
C36 C41 1.408(11) . ?
C36 C37 1.414(11) . ?
C37 C38 1.352(15) . ?
C37 H37 0.95 . ?
C38 C39 1.357(11) . ?
C38 H38 0.95 . ?
C39 C40 1.377(13) . ?
C39 H39 0.95 . ?
C40 C41 1.372(13) . ?
C40 H40 0.95 . ?
C41 H41 0.95 . ?
 
loop_
    _geom_angle_atom_site_label_1
    _geom_angle_atom_site_label_2
    _geom_angle_atom_site_label_3
    _geom_angle
    _geom_angle_site_symmetry_1
    _geom_angle_site_symmetry_3
    _geom_angle_publ_flag
N1 Pb N2 80.2(2) . . ?
N1 Pb P 98.21(15) . . ?
N2 Pb P 105.98(15) . . ?
C36 P C30 101.3(4) . . ?
C36 P Pb 101.1(3) . . ?
C30 P Pb 87.3(2) . . ?
C1 N1 C6 120.7(7) . . ?
C1 N1 Pb 121.2(5) . . ?
C6 N1 Pb 116.8(5) . . ?
C3 N2 C18 121.4(6) . . ?
C3 N2 Pb 121.6(5) . . ?
C18 N2 Pb 115.1(5) . . ?
N1 C1 C2 125.9(8) . . ?
N1 C1 C4 118.8(7) . . ?
C2 C1 C4 115.2(8) . . ?
C3 C2 C1 128.7(8) . . ?
C3 C2 H2 115.7 . . ?
C1 C2 H2 115.7 . . ?
N2 C3 C2 125.2(7) . . ?
N2 C3 C5 120.7(7) . . ?
C2 C3 C5 114.1(7) . . ?
C1 C4 H4A 109.5 . . ?
C1 C4 H4B 109.5 . . ?
H4A C4 H4B 109.5 . . ?
C1 C4 H4C 109.5 . . ?
H4A C4 H4C 109.5 . . ?
H4B C4 H4C 109.5 . . ?
C3 C5 H5A 109.5 . . ?
C3 C5 H5B 109.5 . . ?
H5A C5 H5B 109.5 . . ?
C3 C5 H5C 109.5 . . ?
H5A C5 H5C 109.5 . . ?
H5B C5 H5C 109.5 . . ?
C7 C6 C11 121.2(7) . . ?
C7 C6 N1 119.0(7) . . ?
C11 C6 N1 119.8(7) . . ?
C6 C7 C8 119.2(11) . . ?
C6 C7 C12 120.7(6) . . ?
C8 C7 C12 120.0(10) . . ?
C9 C8 C7 119.7(10) . . ?
C9 C8 H8 120.2 . . ?
C7 C8 H8 120.2 . . ?
C10 C9 C8 121.5(8) . . ?
C10 C9 H9 119.3 . . ?
C8 C9 H9 119.3 . . ?
C9 C10 C11 120.9(8) . . ?
C9 C10 H10 119.5 . . ?
C11 C10 H10 119.5 . . ?
C6 C11 C10 117.5(7) . . ?
C6 C11 C15 123.3(7) . . ?
C10 C11 C15 119.2(7) . . ?
C14 C12 C13 109.1(8) . . ?
C14 C12 C7 114.2(8) . . ?
C13 C12 C7 110.8(7) . . ?
C14 C12 H12 107.5 . . ?
C13 C12 H12 107.5 . . ?
C7 C12 H12 107.5 . . ?
C12 C13 H13A 109.5 . . ?
C12 C13 H13B 109.5 . . ?
H13A C13 H13B 109.5 . . ?
C12 C13 H13C 109.5 . . ?
H13A C13 H13C 109.5 . . ?
H13B C13 H13C 109.5 . . ?
C12 C14 H14A 109.5 . . ?
C12 C14 H14B 109.5 . . ?
H14A C14 H14B 109.5 . . ?
C12 C14 H14C 109.5 . . ?
H14A C14 H14C 109.5 . . ?
H14B C14 H14C 109.5 . . ?
C17 C15 C11 110.9(7) . . ?
C17 C15 C16 109.9(8) . . ?
C11 C15 C16 112.0(8) . . ?
C17 C15 H15 107.9 . . ?
C11 C15 H15 107.9 . . ?
C16 C15 H15 107.9 . . ?
C15 C16 H16A 109.5 . . ?
C15 C16 H16B 109.5 . . ?
H16A C16 H16B 109.5 . . ?
C15 C16 H16C 109.5 . . ?
H16A C16 H16C 109.5 . . ?
H16B C16 H16C 109.5 . . ?
C15 C17 H17A 109.5 . . ?
C15 C17 H17B 109.5 . . ?
H17A C17 H17B 109.5 . . ?
C15 C17 H17C 109.5 . . ?
H17A C17 H17C 109.5 . . ?
H17B C17 H17C 109.5 . . ?
C23 C18 C19 121.2(8) . . ?
C23 C18 N2 121.6(7) . . ?
C19 C18 N2 117.1(7) . . ?
C20 C19 C18 118.3(8) . . ?
C20 C19 C24 121.4(7) . . ?
C18 C19 C24 120.2(7) . . ?
C19 C20 C21 119.9(8) . . ?
C19 C20 H20 120.1 . . ?
C21 C20 H20 120.1 . . ?
C22 C21 C20 121.0(9) . . ?
C22 C21 H21 119.5 . . ?
C20 C21 H21 119.5 . . ?
C21 C22 C23 120.6(9) . . ?
C21 C22 H22 119.7 . . ?
C23 C22 H22 119.7 . . ?
C22 C23 C18 118.9(8) . . ?
C22 C23 C27 119.4(8) . . ?
C18 C23 C27 121.7(8) . . ?
C25 C24 C19 111.5(8) . . ?
C25 C24 C26 110.2(9) . . ?
C19 C24 C26 111.9(9) . . ?
C25 C24 H24 107.7 . . ?
C19 C24 H24 107.7 . . ?
C26 C24 H24 107.7 . . ?
C24 C25 H25A 109.5 . . ?
C24 C25 H25B 109.5 . . ?
H25A C25 H25B 109.5 . . ?
C24 C25 H25C 109.5 . . ?
H25A C25 H25C 109.5 . . ?
H25B C25 H25C 109.5 . . ?
C24 C26 H26A 109.5 . . ?
C24 C26 H26B 109.5 . . ?
H26A C26 H26B 109.5 . . ?
C24 C26 H26C 109.5 . . ?
H26A C26 H26C 109.5 . . ?
H26B C26 H26C 109.5 . . ?
C29 C27 C28 110.2(9) . . ?
C29 C27 C23 111.1(8) . . ?
C28 C27 C23 111.3(8) . . ?
C29 C27 H27 108 . . ?
C28 C27 H27 108 . . ?
C23 C27 H27 108 . . ?
C27 C28 H28A 109.5 . . ?
C27 C28 H28B 109.5 . . ?
H28A C28 H28B 109.5 . . ?
C27 C28 H28C 109.5 . . ?
H28A C28 H28C 109.5 . . ?
H28B C28 H28C 109.5 . . ?
C27 C29 H29A 109.5 . . ?
C27 C29 H29B 109.5 . . ?
H29A C29 H29B 109.5 . . ?
C27 C29 H29C 109.5 . . ?
H29A C29 H29C 109.5 . . ?
H29B C29 H29C 109.5 . . ?
C31 C30 C35 117.7(8) . . ?
C31 C30 P 124.3(6) . . ?
C35 C30 P 117.9(7) . . ?
C32 C31 C30 120.9(7) . . ?
C32 C31 H31 119.5 . . ?
C30 C31 H31 119.5 . . ?
C31 C32 C33 119.7(9) . . ?
C31 C32 H32 120.1 . . ?
C33 C32 H32 120.1 . . ?
C34 C33 C32 120.6(9) . . ?
C34 C33 H33 119.7 . . ?
C32 C33 H33 119.7 . . ?
C35 C34 C33 120.0(9) . . ?
C35 C34 H34 120 . . ?
C33 C34 H34 120 . . ?
C34 C35 C30 121.0(9) . . ?
C34 C35 H35 119.5 . . ?
C30 C35 H35 119.5 . . ?
C41 C36 C37 114.4(8) . . ?
C41 C36 P 122.8(7) . . ?
C37 C36 P 122.0(6) . . ?
C38 C37 C36 122.0(8) . . ?
C38 C37 H37 119 . . ?
C36 C37 H37 119 . . ?
C37 C38 C39 121.8(11) . . ?
C37 C38 H38 119.1 . . ?
C39 C38 H38 119.1 . . ?
C38 C39 C40 119.1(10) . . ?
C38 C39 H39 120.5 . . ?
C40 C39 H39 120.5 . . ?
C41 C40 C39 119.7(8) . . ?
C41 C40 H40 120.1 . . ?
C39 C40 H40 120.1 . . ?
C40 C41 C36 122.9(9) . . ?
C40 C41 H41 118.6 . . ?
C36 C41 H41 118.6 . . ?

#===END
 
data_(3b)-dec509
 
_audit_creation_date            2009-12-10T08:32:15-00:00
_audit_creation_method         'WinGX routine CIF_UPDATE'
_audit_conform_dict_name        cif_core.dic
_audit_conform_dict_version     2.2
_audit_conform_dict_location    ftp://ftp.iucr.org/pub/cif_core.dic
_publ_requested_category        FM
 
#----------------------------------------------------------------------------#
#                   CHEMICAL INFORMATION                                     #
#----------------------------------------------------------------------------#
 
_chemical_name_systematic
;
 ?
;
_chemical_formula_moiety                'C41 H63 N2 P Pb'
_chemical_formula_sum                   'C41 H63 N2 P Pb'
_chemical_formula_weight                822.09
_chemical_compound_source               'synthesis as described'
 
#----------------------------------------------------------------------------#
#                   UNIT CELL INFORMATION                                    #
#----------------------------------------------------------------------------#
 
_symmetry_cell_setting                  monoclinic
_symmetry_space_group_name_H-M          'P 21/c'
_symmetry_space_group_name_Hall         '-P 2ybc'
_symmetry_Int_Tables_number             14
loop_
    _symmetry_equiv_pos_as_xyz
'x, y, z'
'-x, y+1/2, -z+1/2'
'-x, -y, -z'
'x, -y-1/2, z-1/2'
 
_cell_length_a                          9.9586(2)
_cell_length_b                          23.7678(4)
_cell_length_c                          17.4757(2)
_cell_angle_alpha                       90
_cell_angle_beta                        108.531(1)
_cell_angle_gamma                       90
_cell_volume                            3921.93(11)
_cell_formula_units_Z                   4
_cell_measurement_temperature           173(2)
_cell_measurement_reflns_used           73859
_cell_measurement_theta_min             3.395
_cell_measurement_theta_max             27.103
_cell_measurement_wavelength            0.71073
 
#----------------------------------------------------------------------------#
#                   CRYSTAL INFORMATION                                      #
#----------------------------------------------------------------------------#
 
_exptl_crystal_description              Plate
_exptl_crystal_colour                   'Dark red'
_exptl_crystal_size_max                 0.22
_exptl_crystal_size_mid                 0.11
_exptl_crystal_size_min                 0.04
_exptl_crystal_density_diffrn           1.392
_exptl_crystal_density_method           'not measured'
_exptl_crystal_F_000                    1680
_exptl_special_details
;
 ?
;
 
#----------------------------------------------------------------------------#
#                   ABSORPTION CORRECTION                                    #
#----------------------------------------------------------------------------#
 
_exptl_absorpt_coefficient_mu           4.371
_exptl_absorpt_correction_type          multi-scan
_exptl_absorpt_process_details
;
        [c.f. r.h. blessing, acta cryst. (1995), a51, 33-38]
;
_exptl_absorpt_correction_T_min         0.5526
_exptl_absorpt_correction_T_max         0.649
 
#----------------------------------------------------------------------------#
#                   DATA COLLECTION                                          #
#----------------------------------------------------------------------------#
 
_diffrn_source                          'Enraf Nonius FR590'
_diffrn_ambient_temperature             173(2)
_diffrn_radiation_wavelength            0.71073
_diffrn_radiation_type                  MoK\a
_diffrn_radiation_monochromator         graphite
_diffrn_radiation_probe                 x-ray
_diffrn_detector                        'CCD plate'
_diffrn_orient_matrix_type              'by Nonius Collect from scalepack cell'
_diffrn_orient_matrix_ub_11             -0.102704
_diffrn_orient_matrix_ub_12             -0.5138E-3
_diffrn_orient_matrix_ub_13             -0.65202E-2
_diffrn_orient_matrix_ub_21             0.139925E-1
_diffrn_orient_matrix_ub_22             -0.221751E-1
_diffrn_orient_matrix_ub_23             0.51029E-1
_diffrn_orient_matrix_ub_31             0.72028E-2
_diffrn_orient_matrix_ub_32             0.357519E-1
_diffrn_orient_matrix_ub_33             0.31557E-1
_diffrn_measurement_device              '95mm CCD camera on \k-goniostat'
_diffrn_measurement_device_type         KappaCCD
_diffrn_measurement_method              'CCD rotation images, thick slices'
_diffrn_reflns_av_R_equivalents         0.0683
_diffrn_reflns_av_unetI/netI            0.0412
_diffrn_reflns_number                   57828
_diffrn_reflns_limit_h_min              -12
_diffrn_reflns_limit_h_max              12
_diffrn_reflns_limit_k_min              -30
_diffrn_reflns_limit_k_max              30
_diffrn_reflns_limit_l_min              -22
_diffrn_reflns_limit_l_max              22
_diffrn_reflns_theta_min                3.43
_diffrn_reflns_theta_max                27.09
_diffrn_reflns_theta_full               27.09
_diffrn_measured_fraction_theta_full
                                        0.997
_diffrn_measured_fraction_theta_max
                                        0.997
_reflns_number_total                    8624
_reflns_number_gt                       6904
_reflns_threshold_expression            >2sigma(I)
 
#----------------------------------------------------------------------------#
#                   COMPUTER PROGRAMS USED                                   #
#----------------------------------------------------------------------------#
 
_computing_data_collection              'Collect (Nonius BV, 1997-2000)'
_computing_cell_refinement
                                       'HKL Scalepack (Otwinowski & Minor 1997)'
_computing_data_reduction
                             'HKL Denzo and Scalepack (Otwinowski & Minor 1997)'
_computing_structure_solution           'SHELXS-97 (Sheldrick, 1997)'
_computing_structure_refinement         'SHELXL-97 (Sheldrick, 1997)'
_computing_molecular_graphics           'Ortep-3 for Windows (Farrugia, 1997)'
_computing_publication_material
                                   'WinGX publication routines (Farrugia, 1999)'
 
#----------------------------------------------------------------------------#
#                   REFINEMENT INFORMATION                                   #
#----------------------------------------------------------------------------#
 
_refine_special_details
;
 Refinement of F^2^ against ALL reflections.  The weighted R-factor wR and
 goodness of fit S are based on F^2^, conventional R-factors R are based
 on F, with F set to zero for negative F^2^. The threshold expression of
 F^2^ > 2sigma(F^2^) is used only for calculating R-factors(gt) etc. and is
 not relevant to the choice of reflections for refinement.  R-factors based
 on F^2^ are statistically about twice as large as those based on F, and R-
 factors based on ALL data will be even larger.
;
_refine_ls_structure_factor_coef        Fsqd
_refine_ls_matrix_type                  full
_refine_ls_weighting_scheme             calc
_refine_ls_weighting_details
         'calc w=1/[\s^2^(Fo^2^)+(0.0188P)^2^+4.7843P] where P=(Fo^2^+2Fc^2^)/3'
_atom_sites_solution_primary            direct
_atom_sites_solution_secondary          difmap
_atom_sites_solution_hydrogens          geom
_refine_ls_hydrogen_treatment           constr
_refine_ls_extinction_method            none
_refine_ls_number_reflns                8624
_refine_ls_number_parameters            408
_refine_ls_number_restraints            0
_refine_ls_R_factor_all                 0.0468
_refine_ls_R_factor_gt                  0.0293
_refine_ls_wR_factor_ref                0.0584
_refine_ls_wR_factor_gt                 0.054
_refine_ls_goodness_of_fit_ref          1.032
_refine_ls_restrained_S_all             1.032
_refine_ls_shift/su_max                 0.004
_refine_ls_shift/su_mean                0
_refine_diff_density_max                0.987
_refine_diff_density_min                -0.966
_refine_diff_density_rms                0.1
 
#----------------------------------------------------------------------------#
#                   ATOMIC TYPES, COORDINATES AND THERMAL PARAMETERS         #
#----------------------------------------------------------------------------#
 
loop_
    _atom_type_symbol
    _atom_type_description
    _atom_type_scat_dispersion_real
    _atom_type_scat_dispersion_imag
    _atom_type_scat_source
C C 0.0033 0.0016 'International Tables Vol C Tables 4.2.6.8 and 6.1.1.4'
H H 0 0 'International Tables Vol C Tables 4.2.6.8 and 6.1.1.4'
N N 0.0061 0.0033 'International Tables Vol C Tables 4.2.6.8 and 6.1.1.4'
P P 0.1023 0.0942 'International Tables Vol C Tables 4.2.6.8 and 6.1.1.4'
Pb Pb -3.3944 10.1111 'International Tables Vol C Tables 4.2.6.8 and 6.1.1.4'
 
loop_
    _atom_site_label
    _atom_site_type_symbol
    _atom_site_fract_x
    _atom_site_fract_y
    _atom_site_fract_z
    _atom_site_U_iso_or_equiv
    _atom_site_adp_type
    _atom_site_occupancy
    _atom_site_symmetry_multiplicity
    _atom_site_calc_flag
    _atom_site_refinement_flags
    _atom_site_disorder_assembly
    _atom_site_disorder_group
Pb Pb 0.174856(13) 0.817212(5) 0.282936(7) 0.02028(4) Uani 1 1 d . . .
P P 0.14838(10) 0.82954(4) 0.12554(5) 0.0257(2) Uani 1 1 d . . .
N1 N 0.3452(3) 0.88542(10) 0.34356(15) 0.0194(6) Uani 1 1 d . . .
N2 N 0.3751(3) 0.76023(11) 0.32215(16) 0.0225(6) Uani 1 1 d . . .
C1 C 0.4437(3) 0.87280(14) 0.41262(19) 0.0222(7) Uani 1 1 d . . .
C2 C 0.4913(4) 0.81807(14) 0.4379(2) 0.0272(7) Uani 1 1 d . . .
H2 H 0.5435 0.8145 0.4935 0.033 Uiso 1 1 calc R . .
C3 C 0.4733(4) 0.76785(14) 0.3930(2) 0.0248(7) Uani 1 1 d . . .
C4 C 0.5168(4) 0.91903(15) 0.4698(2) 0.0339(9) Uani 1 1 d . . .
H4A H 0.5144 0.9539 0.4395 0.051 Uiso 1 1 calc R . .
H4B H 0.6154 0.9083 0.4974 0.051 Uiso 1 1 calc R . .
H4C H 0.468 0.9249 0.5099 0.051 Uiso 1 1 calc R . .
C5 C 0.5753(4) 0.72088(15) 0.4301(2) 0.0409(10) Uani 1 1 d . . .
H5A H 0.5374 0.6983 0.4654 0.061 Uiso 1 1 calc R . .
H5B H 0.6669 0.7369 0.4616 0.061 Uiso 1 1 calc R . .
H5C H 0.5879 0.6969 0.3872 0.061 Uiso 1 1 calc R . .
C6 C 0.3177(3) 0.94293(13) 0.31907(19) 0.0212(7) Uani 1 1 d . . .
C7 C 0.3792(3) 0.96494(14) 0.2633(2) 0.0257(8) Uani 1 1 d . . .
C8 C 0.3531(4) 1.02084(15) 0.2402(2) 0.0339(9) Uani 1 1 d . . .
H8 H 0.3958 1.0366 0.2037 0.041 Uiso 1 1 calc R . .
C9 C 0.2658(4) 1.05395(16) 0.2694(2) 0.0398(10) Uani 1 1 d . . .
H9 H 0.2496 1.0922 0.2531 0.048 Uiso 1 1 calc R . .
C10 C 0.2022(4) 1.03132(15) 0.3223(2) 0.0331(9) Uani 1 1 d . . .
H10 H 0.1414 1.0541 0.3415 0.04 Uiso 1 1 calc R . .
C11 C 0.2260(4) 0.97547(14) 0.3478(2) 0.0256(8) Uani 1 1 d . . .
C12 C 0.4723(4) 0.92836(15) 0.2296(2) 0.0309(8) Uani 1 1 d . . .
H12 H 0.4368 0.8889 0.228 0.037 Uiso 1 1 calc R . .
C13 C 0.6262(4) 0.9284(2) 0.2840(3) 0.0515(12) Uani 1 1 d . . .
H13A H 0.6825 0.9042 0.2605 0.077 Uiso 1 1 calc R . .
H13B H 0.6315 0.9142 0.3376 0.077 Uiso 1 1 calc R . .
H13C H 0.6635 0.9669 0.289 0.077 Uiso 1 1 calc R . .
C14 C 0.4657(5) 0.9439(2) 0.1435(2) 0.0514(11) Uani 1 1 d . . .
H14A H 0.5274 0.9187 0.1254 0.077 Uiso 1 1 calc R . .
H14B H 0.4975 0.9829 0.1425 0.077 Uiso 1 1 calc R . .
H14C H 0.3681 0.9402 0.1075 0.077 Uiso 1 1 calc R . .
C15 C 0.1474(4) 0.95138(15) 0.4018(2) 0.0270(8) Uani 1 1 d . . .
H15 H 0.1808 0.9118 0.4153 0.032 Uiso 1 1 calc R . .
C16 C 0.1756(4) 0.98341(17) 0.4813(2) 0.0384(9) Uani 1 1 d . . .
H16A H 0.1223 0.9659 0.5135 0.058 Uiso 1 1 calc R . .
H16B H 0.1454 1.0226 0.47 0.058 Uiso 1 1 calc R . .
H16C H 0.277 0.9822 0.5114 0.058 Uiso 1 1 calc R . .
C17 C -0.0118(4) 0.94924(17) 0.3571(2) 0.0378(9) Uani 1 1 d . . .
H17A H -0.0608 0.9333 0.3926 0.057 Uiso 1 1 calc R . .
H17B H -0.0295 0.9256 0.3089 0.057 Uiso 1 1 calc R . .
H17C H -0.0469 0.9874 0.341 0.057 Uiso 1 1 calc R . .
C18 C 0.3735(4) 0.70983(14) 0.2766(2) 0.0254(8) Uani 1 1 d . . .
C19 C 0.4469(4) 0.70921(16) 0.2202(2) 0.0340(9) Uani 1 1 d . . .
C20 C 0.4356(5) 0.66127(18) 0.1727(3) 0.0446(11) Uani 1 1 d . . .
H20 H 0.4842 0.66 0.1339 0.054 Uiso 1 1 calc R . .
C21 C 0.3559(5) 0.61589(17) 0.1807(3) 0.0466(11) Uani 1 1 d . . .
H21 H 0.3491 0.5838 0.1472 0.056 Uiso 1 1 calc R . .
C22 C 0.2855(4) 0.61668(16) 0.2374(2) 0.0392(10) Uani 1 1 d . . .
H22 H 0.231 0.585 0.2426 0.047 Uiso 1 1 calc R . .
C23 C 0.2934(4) 0.66334(14) 0.2870(2) 0.0296(8) Uani 1 1 d . . .
C24 C 0.5428(4) 0.75779(18) 0.2141(3) 0.0445(11) Uani 1 1 d . . .
H24 H 0.5231 0.79 0.2457 0.053 Uiso 1 1 calc R . .
C25 C 0.6995(6) 0.7415(3) 0.2520(4) 0.102(2) Uani 1 1 d . . .
H25A H 0.7596 0.7733 0.248 0.153 Uiso 1 1 calc R . .
H25B H 0.7209 0.709 0.2232 0.153 Uiso 1 1 calc R . .
H25C H 0.7179 0.7317 0.3089 0.153 Uiso 1 1 calc R . .
C26 C 0.5178(6) 0.7778(2) 0.1287(3) 0.0646(14) Uani 1 1 d . . .
H26A H 0.5816 0.8092 0.1289 0.097 Uiso 1 1 calc R . .
H26B H 0.4193 0.7902 0.1054 0.097 Uiso 1 1 calc R . .
H26C H 0.5362 0.7469 0.0962 0.097 Uiso 1 1 calc R . .
C27 C 0.2207(4) 0.66189(16) 0.3515(2) 0.0365(9) Uani 1 1 d . . .
H27 H 0.237 0.6992 0.3796 0.044 Uiso 1 1 calc R . .
C28 C 0.0626(4) 0.65301(19) 0.3179(2) 0.0461(11) Uani 1 1 d . . .
H28A H 0.022 0.6528 0.3621 0.069 Uiso 1 1 calc R . .
H28B H 0.0432 0.6169 0.2893 0.069 Uiso 1 1 calc R . .
H28C H 0.02 0.6835 0.2803 0.069 Uiso 1 1 calc R . .
C29 C 0.2879(5) 0.6164(2) 0.4152(3) 0.0563(13) Uani 1 1 d . . .
H29A H 0.2404 0.6162 0.4565 0.084 Uiso 1 1 calc R . .
H29B H 0.3887 0.6246 0.4406 0.084 Uiso 1 1 calc R . .
H29C H 0.2772 0.5795 0.3891 0.084 Uiso 1 1 calc R . .
C30 C -0.0198(4) 0.87146(14) 0.10309(19) 0.0250(7) Uani 1 1 d . . .
H30 H -0.0825 0.8533 0.1307 0.03 Uiso 1 1 calc R . .
C31 C -0.1009(4) 0.87579(16) 0.0127(2) 0.0341(9) Uani 1 1 d . . .
H31A H -0.0386 0.8927 -0.0154 0.041 Uiso 1 1 calc R . .
H31B H -0.1275 0.8376 -0.0096 0.041 Uiso 1 1 calc R . .
C32 C -0.2342(4) 0.91155(16) -0.0031(2) 0.0407(10) Uani 1 1 d . . .
H32A H -0.2822 0.9144 -0.062 0.049 Uiso 1 1 calc R . .
H32B H -0.3 0.893 0.0212 0.049 Uiso 1 1 calc R . .
C33 C -0.1996(5) 0.97047(16) 0.0323(2) 0.0453(11) Uani 1 1 d . . .
H33A H -0.2886 0.9915 0.025 0.054 Uiso 1 1 calc R . .
H33B H -0.1439 0.9909 0.0032 0.054 Uiso 1 1 calc R . .
C34 C -0.1153(4) 0.96740(17) 0.1219(2) 0.0456(11) Uani 1 1 d . . .
H34A H -0.176 0.9517 0.1518 0.055 Uiso 1 1 calc R . .
H34B H -0.0868 1.0058 0.1425 0.055 Uiso 1 1 calc R . .
C35 C 0.0169(4) 0.93084(15) 0.1370(2) 0.0342(9) Uani 1 1 d . . .
H35A H 0.0666 0.9285 0.1958 0.041 Uiso 1 1 calc R . .
H35B H 0.0819 0.9486 0.1115 0.041 Uiso 1 1 calc R . .
C36 C 0.0848(4) 0.75541(14) 0.0963(2) 0.0267(8) Uani 1 1 d . . .
H36 H 0.1589 0.7302 0.132 0.032 Uiso 1 1 calc R . .
C37 C 0.0795(4) 0.74138(16) 0.0095(2) 0.0344(9) Uani 1 1 d . . .
H37A H 0.0077 0.7655 -0.0286 0.041 Uiso 1 1 calc R . .
H37B H 0.1726 0.7498 0.003 0.041 Uiso 1 1 calc R . .
C38 C 0.0426(5) 0.67950(16) -0.0114(2) 0.0405(10) Uani 1 1 d . . .
H38A H 0.0345 0.6727 -0.0686 0.049 Uiso 1 1 calc R . .
H38B H 0.1195 0.6553 0.0226 0.049 Uiso 1 1 calc R . .
C39 C -0.0964(5) 0.66398(16) 0.0024(2) 0.0388(10) Uani 1 1 d . . .
H39A H -0.1748 0.6856 -0.0353 0.047 Uiso 1 1 calc R . .
H39B H -0.1157 0.6234 -0.0088 0.047 Uiso 1 1 calc R . .
C40 C -0.0908(4) 0.67652(15) 0.0886(2) 0.0361(9) Uani 1 1 d . . .
H40A H -0.0182 0.6524 0.1261 0.043 Uiso 1 1 calc R . .
H40B H -0.1836 0.6676 0.0953 0.043 Uiso 1 1 calc R . .
C41 C -0.0551(4) 0.73823(14) 0.1092(2) 0.0268(8) Uani 1 1 d . . .
H41A H -0.0482 0.7449 0.1662 0.032 Uiso 1 1 calc R . .
H41B H -0.1325 0.762 0.075 0.032 Uiso 1 1 calc R . .
 
loop_
    _atom_site_aniso_label
    _atom_site_aniso_U_11
    _atom_site_aniso_U_22
    _atom_site_aniso_U_33
    _atom_site_aniso_U_23
    _atom_site_aniso_U_13
    _atom_site_aniso_U_12
Pb 0.01625(6) 0.01785(6) 0.02496(7) -0.00126(5) 0.00404(4) -0.00018(6)
P 0.0243(5) 0.0251(5) 0.0259(5) 0.0008(3) 0.0055(4) -0.0015(4)
N1 0.0182(14) 0.0145(14) 0.0239(15) -0.0009(11) 0.0043(11) -0.0021(11)
N2 0.0210(15) 0.0194(15) 0.0248(15) -0.0007(11) 0.0040(12) 0.0048(12)
C1 0.0161(17) 0.0237(18) 0.0257(18) -0.0017(13) 0.0050(14) -0.0025(14)
C2 0.0267(18) 0.0236(18) 0.0246(18) 0.0013(15) -0.0014(14) -0.0011(16)
C3 0.0220(18) 0.0237(19) 0.0281(19) 0.0079(14) 0.0070(15) 0.0017(15)
C4 0.030(2) 0.0236(19) 0.039(2) -0.0040(15) -0.0030(16) -0.0011(16)
C5 0.037(2) 0.026(2) 0.045(2) 0.0000(17) -0.0080(18) 0.0085(18)
C6 0.0161(16) 0.0157(17) 0.0281(18) -0.0007(13) 0.0017(13) -0.0025(13)
C7 0.0169(17) 0.0239(19) 0.033(2) 0.0045(14) 0.0027(14) -0.0046(14)
C8 0.029(2) 0.029(2) 0.044(2) 0.0112(16) 0.0107(17) -0.0029(16)
C9 0.037(2) 0.021(2) 0.058(3) 0.0108(18) 0.0097(19) 0.0016(17)
C10 0.030(2) 0.0203(19) 0.048(2) -0.0010(16) 0.0106(17) 0.0021(15)
C11 0.0226(19) 0.0179(17) 0.033(2) -0.0007(14) 0.0040(15) -0.0014(14)
C12 0.022(2) 0.032(2) 0.038(2) 0.0053(16) 0.0082(16) -0.0013(16)
C13 0.023(2) 0.074(3) 0.058(3) 0.000(2) 0.012(2) 0.006(2)
C14 0.052(3) 0.063(3) 0.047(3) 0.011(2) 0.027(2) 0.006(2)
C15 0.0236(19) 0.0208(18) 0.037(2) -0.0019(15) 0.0098(15) 0.0002(15)
C16 0.036(2) 0.039(2) 0.040(2) -0.0080(18) 0.0132(18) -0.0035(18)
C17 0.026(2) 0.043(2) 0.043(2) 0.0029(18) 0.0090(17) -0.0050(18)
C18 0.0245(19) 0.0212(18) 0.0265(19) 0.0009(14) 0.0024(14) 0.0093(15)
C19 0.027(2) 0.034(2) 0.039(2) -0.0040(17) 0.0084(17) 0.0064(17)
C20 0.042(3) 0.045(3) 0.050(3) -0.011(2) 0.019(2) 0.011(2)
C21 0.049(3) 0.031(2) 0.053(3) -0.0155(19) 0.006(2) 0.011(2)
C22 0.046(3) 0.019(2) 0.046(2) -0.0023(16) 0.005(2) -0.0003(17)
C23 0.030(2) 0.0187(17) 0.035(2) 0.0016(14) 0.0031(16) 0.0028(15)
C24 0.038(2) 0.047(3) 0.060(3) -0.010(2) 0.031(2) -0.003(2)
C25 0.047(4) 0.151(7) 0.106(5) 0.039(5) 0.022(3) -0.027(4)
C26 0.071(4) 0.052(3) 0.081(4) 0.005(3) 0.039(3) 0.002(3)
C27 0.048(3) 0.0246(19) 0.035(2) 0.0025(16) 0.0113(19) -0.0096(18)
C28 0.044(3) 0.053(3) 0.041(2) 0.009(2) 0.014(2) -0.001(2)
C29 0.057(3) 0.057(3) 0.044(3) 0.021(2) 0.001(2) -0.014(2)
C30 0.0247(19) 0.0231(18) 0.0245(18) 0.0008(14) 0.0037(14) 0.0019(15)
C31 0.038(2) 0.031(2) 0.0243(19) -0.0010(15) -0.0030(16) 0.0030(17)
C32 0.039(2) 0.034(2) 0.034(2) 0.0006(17) -0.0078(17) 0.0063(19)
C33 0.047(3) 0.025(2) 0.047(3) 0.0011(17) -0.008(2) 0.0076(19)
C34 0.045(3) 0.031(2) 0.046(2) -0.0069(18) -0.0059(19) 0.0106(19)
C35 0.035(2) 0.025(2) 0.033(2) -0.0011(15) -0.0020(17) 0.0025(16)
C36 0.0256(19) 0.0242(19) 0.0269(19) 0.0005(14) 0.0033(15) 0.0027(15)
C37 0.042(2) 0.033(2) 0.032(2) -0.0058(16) 0.0176(18) -0.0022(18)
C38 0.055(3) 0.034(2) 0.036(2) -0.0083(17) 0.0203(19) 0.002(2)
C39 0.050(3) 0.0220(19) 0.041(2) -0.0087(16) 0.0105(19) -0.0035(18)
C40 0.041(2) 0.030(2) 0.036(2) -0.0006(16) 0.0091(17) -0.0051(18)
C41 0.027(2) 0.0230(19) 0.0285(19) -0.0008(14) 0.0062(15) -0.0018(15)
 
 
#----------------------------------------------------------------------------#
#                   MOLECULAR GEOMETRY                                       #
#----------------------------------------------------------------------------#
 
_geom_special_details
;
 All esds (except the esd in the dihedral angle between two l.s. planes)
 are estimated using the full covariance matrix.  The cell esds are taken
 into account individually in the estimation of esds in distances, angles
 and torsion angles; correlations between esds in cell parameters are only
 used when they are defined by crystal symmetry.  An approximate (isotropic)
 treatment of cell esds is used for estimating esds involving l.s. planes.
;
loop_
    _geom_bond_atom_site_label_1
    _geom_bond_atom_site_label_2
    _geom_bond_distance
    _geom_bond_site_symmetry_2
    _geom_bond_publ_flag
Pb N2 2.326(3) . ?
Pb N1 2.342(3) . ?
Pb P 2.6945(9) . ?
P C30 1.880(3) . ?
P C36 1.887(3) . ?
N1 C1 1.325(4) . ?
N1 C6 1.433(4) . ?
N2 C3 1.324(4) . ?
N2 C18 1.436(4) . ?
C1 C2 1.407(5) . ?
C1 C4 1.508(5) . ?
C2 C3 1.408(5) . ?
C2 H2 0.95 . ?
C3 C5 1.510(5) . ?
C4 H4A 0.98 . ?
C4 H4B 0.98 . ?
C4 H4C 0.98 . ?
C5 H5A 0.98 . ?
C5 H5B 0.98 . ?
C5 H5C 0.98 . ?
C6 C11 1.406(5) . ?
C6 C7 1.406(5) . ?
C7 C8 1.389(5) . ?
C7 C12 1.520(5) . ?
C8 C9 1.384(5) . ?
C8 H8 0.95 . ?
C9 C10 1.384(5) . ?
C9 H9 0.95 . ?
C10 C11 1.397(5) . ?
C10 H10 0.95 . ?
C11 C15 1.516(5) . ?
C12 C13 1.526(5) . ?
C12 C14 1.531(5) . ?
C12 H12 1 . ?
C13 H13A 0.98 . ?
C13 H13B 0.98 . ?
C13 H13C 0.98 . ?
C14 H14A 0.98 . ?
C14 H14B 0.98 . ?
C14 H14C 0.98 . ?
C15 C17 1.529(5) . ?
C15 C16 1.530(5) . ?
C15 H15 1 . ?
C16 H16A 0.98 . ?
C16 H16B 0.98 . ?
C16 H16C 0.98 . ?
C17 H17A 0.98 . ?
C17 H17B 0.98 . ?
C17 H17C 0.98 . ?
C18 C19 1.401(5) . ?
C18 C23 1.408(5) . ?
C19 C20 1.393(5) . ?
C19 C24 1.524(6) . ?
C20 C21 1.372(6) . ?
C20 H20 0.95 . ?
C21 C22 1.384(6) . ?
C21 H21 0.95 . ?
C22 C23 1.395(5) . ?
C22 H22 0.95 . ?
C23 C27 1.522(5) . ?
C24 C26 1.510(6) . ?
C24 C25 1.539(7) . ?
C24 H24 1 . ?
C25 H25A 0.98 . ?
C25 H25B 0.98 . ?
C25 H25C 0.98 . ?
C26 H26A 0.98 . ?
C26 H26B 0.98 . ?
C26 H26C 0.98 . ?
C27 C28 1.511(6) . ?
C27 C29 1.543(5) . ?
C27 H27 1 . ?
C28 H28A 0.98 . ?
C28 H28B 0.98 . ?
C28 H28C 0.98 . ?
C29 H29A 0.98 . ?
C29 H29B 0.98 . ?
C29 H29C 0.98 . ?
C30 C35 1.529(5) . ?
C30 C31 1.532(4) . ?
C30 H30 1 . ?
C31 C32 1.526(5) . ?
C31 H31A 0.99 . ?
C31 H31B 0.99 . ?
C32 C33 1.525(5) . ?
C32 H32A 0.99 . ?
C32 H32B 0.99 . ?
C33 C34 1.526(5) . ?
C33 H33A 0.99 . ?
C33 H33B 0.99 . ?
C34 C35 1.528(5) . ?
C34 H34A 0.99 . ?
C34 H34B 0.99 . ?
C35 H35A 0.99 . ?
C35 H35B 0.99 . ?
C36 C41 1.535(5) . ?
C36 C37 1.538(5) . ?
C36 H36 1 . ?
C37 C38 1.532(5) . ?
C37 H37A 0.99 . ?
C37 H37B 0.99 . ?
C38 C39 1.524(6) . ?
C38 H38A 0.99 . ?
C38 H38B 0.99 . ?
C39 C40 1.518(5) . ?
C39 H39A 0.99 . ?
C39 H39B 0.99 . ?
C40 C41 1.525(5) . ?
C40 H40A 0.99 . ?
C40 H40B 0.99 . ?
C41 H41A 0.99 . ?
C41 H41B 0.99 . ?
 
loop_
    _geom_angle_atom_site_label_1
    _geom_angle_atom_site_label_2
    _geom_angle_atom_site_label_3
    _geom_angle
    _geom_angle_site_symmetry_1
    _geom_angle_site_symmetry_3
    _geom_angle_publ_flag
N2 Pb N1 80.79(9) . . ?
N2 Pb P 99.25(7) . . ?
N1 Pb P 102.03(7) . . ?
C30 P C36 103.79(15) . . ?
C30 P Pb 93.57(11) . . ?
C36 P Pb 95.17(11) . . ?
C1 N1 C6 120.3(3) . . ?
C1 N1 Pb 118.4(2) . . ?
C6 N1 Pb 118.89(19) . . ?
C3 N2 C18 120.5(3) . . ?
C3 N2 Pb 120.3(2) . . ?
C18 N2 Pb 117.7(2) . . ?
N1 C1 C2 125.0(3) . . ?
N1 C1 C4 120.0(3) . . ?
C2 C1 C4 115.0(3) . . ?
C1 C2 C3 129.7(3) . . ?
C1 C2 H2 115.2 . . ?
C3 C2 H2 115.2 . . ?
N2 C3 C2 124.2(3) . . ?
N2 C3 C5 119.8(3) . . ?
C2 C3 C5 116.0(3) . . ?
C1 C4 H4A 109.5 . . ?
C1 C4 H4B 109.5 . . ?
H4A C4 H4B 109.5 . . ?
C1 C4 H4C 109.5 . . ?
H4A C4 H4C 109.5 . . ?
H4B C4 H4C 109.5 . . ?
C3 C5 H5A 109.5 . . ?
C3 C5 H5B 109.5 . . ?
H5A C5 H5B 109.5 . . ?
C3 C5 H5C 109.5 . . ?
H5A C5 H5C 109.5 . . ?
H5B C5 H5C 109.5 . . ?
C11 C6 C7 121.2(3) . . ?
C11 C6 N1 120.2(3) . . ?
C7 C6 N1 118.5(3) . . ?
C8 C7 C6 118.3(3) . . ?
C8 C7 C12 121.0(3) . . ?
C6 C7 C12 120.6(3) . . ?
C9 C8 C7 121.2(3) . . ?
C9 C8 H8 119.4 . . ?
C7 C8 H8 119.4 . . ?
C10 C9 C8 119.9(3) . . ?
C10 C9 H9 120 . . ?
C8 C9 H9 120 . . ?
C9 C10 C11 121.1(4) . . ?
C9 C10 H10 119.5 . . ?
C11 C10 H10 119.5 . . ?
C10 C11 C6 118.2(3) . . ?
C10 C11 C15 119.3(3) . . ?
C6 C11 C15 122.5(3) . . ?
C7 C12 C13 111.9(3) . . ?
C7 C12 C14 113.7(3) . . ?
C13 C12 C14 109.5(3) . . ?
C7 C12 H12 107.1 . . ?
C13 C12 H12 107.1 . . ?
C14 C12 H12 107.1 . . ?
C12 C13 H13A 109.5 . . ?
C12 C13 H13B 109.5 . . ?
H13A C13 H13B 109.5 . . ?
C12 C13 H13C 109.5 . . ?
H13A C13 H13C 109.5 . . ?
H13B C13 H13C 109.5 . . ?
C12 C14 H14A 109.5 . . ?
C12 C14 H14B 109.5 . . ?
H14A C14 H14B 109.5 . . ?
C12 C14 H14C 109.5 . . ?
H14A C14 H14C 109.5 . . ?
H14B C14 H14C 109.5 . . ?
C11 C15 C17 110.5(3) . . ?
C11 C15 C16 113.3(3) . . ?
C17 C15 C16 110.0(3) . . ?
C11 C15 H15 107.6 . . ?
C17 C15 H15 107.6 . . ?
C16 C15 H15 107.6 . . ?
C15 C16 H16A 109.5 . . ?
C15 C16 H16B 109.5 . . ?
H16A C16 H16B 109.5 . . ?
C15 C16 H16C 109.5 . . ?
H16A C16 H16C 109.5 . . ?
H16B C16 H16C 109.5 . . ?
C15 C17 H17A 109.5 . . ?
C15 C17 H17B 109.5 . . ?
H17A C17 H17B 109.5 . . ?
C15 C17 H17C 109.5 . . ?
H17A C17 H17C 109.5 . . ?
H17B C17 H17C 109.5 . . ?
C19 C18 C23 121.7(3) . . ?
C19 C18 N2 118.9(3) . . ?
C23 C18 N2 119.3(3) . . ?
C20 C19 C18 117.8(4) . . ?
C20 C19 C24 120.8(4) . . ?
C18 C19 C24 121.3(3) . . ?
C21 C20 C19 121.4(4) . . ?
C21 C20 H20 119.3 . . ?
C19 C20 H20 119.3 . . ?
C20 C21 C22 120.2(4) . . ?
C20 C21 H21 119.9 . . ?
C22 C21 H21 119.9 . . ?
C21 C22 C23 121.0(4) . . ?
C21 C22 H22 119.5 . . ?
C23 C22 H22 119.5 . . ?
C22 C23 C18 117.8(4) . . ?
C22 C23 C27 119.8(3) . . ?
C18 C23 C27 122.4(3) . . ?
C26 C24 C19 113.4(4) . . ?
C26 C24 C25 109.3(4) . . ?
C19 C24 C25 110.6(4) . . ?
C26 C24 H24 107.8 . . ?
C19 C24 H24 107.8 . . ?
C25 C24 H24 107.8 . . ?
C24 C25 H25A 109.5 . . ?
C24 C25 H25B 109.5 . . ?
H25A C25 H25B 109.5 . . ?
C24 C25 H25C 109.5 . . ?
H25A C25 H25C 109.5 . . ?
H25B C25 H25C 109.5 . . ?
C24 C26 H26A 109.5 . . ?
C24 C26 H26B 109.5 . . ?
H26A C26 H26B 109.5 . . ?
C24 C26 H26C 109.5 . . ?
H26A C26 H26C 109.5 . . ?
H26B C26 H26C 109.5 . . ?
C28 C27 C23 113.4(3) . . ?
C28 C27 C29 110.0(3) . . ?
C23 C27 C29 110.6(4) . . ?
C28 C27 H27 107.6 . . ?
C23 C27 H27 107.6 . . ?
C29 C27 H27 107.6 . . ?
C27 C28 H28A 109.5 . . ?
C27 C28 H28B 109.5 . . ?
H28A C28 H28B 109.5 . . ?
C27 C28 H28C 109.5 . . ?
H28A C28 H28C 109.5 . . ?
H28B C28 H28C 109.5 . . ?
C27 C29 H29A 109.5 . . ?
C27 C29 H29B 109.5 . . ?
H29A C29 H29B 109.5 . . ?
C27 C29 H29C 109.5 . . ?
H29A C29 H29C 109.5 . . ?
H29B C29 H29C 109.5 . . ?
C35 C30 C31 108.7(3) . . ?
C35 C30 P 108.7(2) . . ?
C31 C30 P 113.1(2) . . ?
C35 C30 H30 108.7 . . ?
C31 C30 H30 108.7 . . ?
P C30 H30 108.7 . . ?
C32 C31 C30 111.5(3) . . ?
C32 C31 H31A 109.3 . . ?
C30 C31 H31A 109.3 . . ?
C32 C31 H31B 109.3 . . ?
C30 C31 H31B 109.3 . . ?
H31A C31 H31B 108 . . ?
C33 C32 C31 111.5(3) . . ?
C33 C32 H32A 109.3 . . ?
C31 C32 H32A 109.3 . . ?
C33 C32 H32B 109.3 . . ?
C31 C32 H32B 109.3 . . ?
H32A C32 H32B 108 . . ?
C32 C33 C34 110.6(3) . . ?
C32 C33 H33A 109.5 . . ?
C34 C33 H33A 109.5 . . ?
C32 C33 H33B 109.5 . . ?
C34 C33 H33B 109.5 . . ?
H33A C33 H33B 108.1 . . ?
C33 C34 C35 111.6(3) . . ?
C33 C34 H34A 109.3 . . ?
C35 C34 H34A 109.3 . . ?
C33 C34 H34B 109.3 . . ?
C35 C34 H34B 109.3 . . ?
H34A C34 H34B 108 . . ?
C34 C35 C30 111.8(3) . . ?
C34 C35 H35A 109.3 . . ?
C30 C35 H35A 109.3 . . ?
C34 C35 H35B 109.3 . . ?
C30 C35 H35B 109.3 . . ?
H35A C35 H35B 107.9 . . ?
C41 C36 C37 109.8(3) . . ?
C41 C36 P 116.8(2) . . ?
C37 C36 P 111.9(2) . . ?
C41 C36 H36 105.8 . . ?
C37 C36 H36 105.8 . . ?
P C36 H36 105.8 . . ?
C38 C37 C36 111.9(3) . . ?
C38 C37 H37A 109.2 . . ?
C36 C37 H37A 109.2 . . ?
C38 C37 H37B 109.2 . . ?
C36 C37 H37B 109.2 . . ?
H37A C37 H37B 107.9 . . ?
C39 C38 C37 110.8(3) . . ?
C39 C38 H38A 109.5 . . ?
C37 C38 H38A 109.5 . . ?
C39 C38 H38B 109.5 . . ?
C37 C38 H38B 109.5 . . ?
H38A C38 H38B 108.1 . . ?
C40 C39 C38 111.1(3) . . ?
C40 C39 H39A 109.4 . . ?
C38 C39 H39A 109.4 . . ?
C40 C39 H39B 109.4 . . ?
C38 C39 H39B 109.4 . . ?
H39A C39 H39B 108 . . ?
C39 C40 C41 110.8(3) . . ?
C39 C40 H40A 109.5 . . ?
C41 C40 H40A 109.5 . . ?
C39 C40 H40B 109.5 . . ?
C41 C40 H40B 109.5 . . ?
H40A C40 H40B 108.1 . . ?
C40 C41 C36 112.1(3) . . ?
C40 C41 H41A 109.2 . . ?
C36 C41 H41A 109.2 . . ?
C40 C41 H41B 109.2 . . ?
C36 C41 H41B 109.2 . . ?
H41A C41 H41B 107.9 . . ?
 
#===END

data_(II')-jun609
 
_audit_creation_date            2009-06-24T10:22:49-00:00
_audit_creation_method         'WinGX routine CIF_UPDATE'
_audit_conform_dict_name        cif_core.dic
_audit_conform_dict_version     2.2
_audit_conform_dict_location    ftp://ftp.iucr.org/pub/cif_core.dic
_publ_requested_category        FM
 
#----------------------------------------------------------------------------#
#                   CHEMICAL INFORMATION                                     #
#----------------------------------------------------------------------------#
 
_chemical_name_systematic
;
 ?
;
_chemical_formula_moiety                'C29 H41 Cl N2 Sn, C7 H8'
_chemical_formula_sum                   'C36 H49 Cl N2 Sn'
_chemical_formula_weight                663.91
_chemical_compound_source               'synthesis as described'
 
#----------------------------------------------------------------------------#
#                   UNIT CELL INFORMATION                                    #
#----------------------------------------------------------------------------#
 
_symmetry_cell_setting                  orthorhombic
_symmetry_space_group_name_H-M          'P n m a'
_symmetry_space_group_name_Hall         '-P 2ac 2n'
_symmetry_Int_Tables_number             62
loop_
    _symmetry_equiv_pos_as_xyz
'x, y, z'
'-x+1/2, -y, z+1/2'
'x+1/2, -y+1/2, -z+1/2'
'-x, y+1/2, -z'
'-x, -y, -z'
'x-1/2, y, -z-1/2'
'-x-1/2, y-1/2, z-1/2'
'x, -y-1/2, z'
 
_cell_length_a                          23.9643(2)
_cell_length_b                          27.8303(3)
_cell_length_c                          10.2198(1)
_cell_angle_alpha                       90
_cell_angle_beta                        90
_cell_angle_gamma                       90
_cell_volume                            6815.93(11)
_cell_formula_units_Z                   8
_cell_measurement_temperature           173(2)
_cell_measurement_reflns_used           115469
_cell_measurement_theta_min             3.395
_cell_measurement_theta_max             27.878
_cell_measurement_wavelength            0.71073
 
#----------------------------------------------------------------------------#
#                   CRYSTAL INFORMATION                                      #
#----------------------------------------------------------------------------#
 
_exptl_crystal_description              Plate
_exptl_crystal_colour                   Colourless
_exptl_crystal_size_max                 0.3
_exptl_crystal_size_mid                 0.2
_exptl_crystal_size_min                 0.08
_exptl_crystal_density_diffrn           1.294
_exptl_crystal_density_method           'not measured'
_exptl_crystal_F_000                    2768
_exptl_special_details
;
 ?
;
 
#----------------------------------------------------------------------------#
#                   ABSORPTION CORRECTION                                    #
#----------------------------------------------------------------------------#
 
_exptl_absorpt_coefficient_mu           0.854
_exptl_absorpt_correction_type          multi-scan
_exptl_absorpt_process_details
;
        [c.f. r.h. blessing, acta cryst. (1995), a51, 33-38]
;
_exptl_absorpt_correction_T_min         0.7958
_exptl_absorpt_correction_T_max         0.8845
 
#----------------------------------------------------------------------------#
#                   DATA COLLECTION                                          #
#----------------------------------------------------------------------------#
 
_diffrn_source                          'Enraf Nonius FR590'
_diffrn_ambient_temperature             173(2)
_diffrn_radiation_wavelength            0.71073
_diffrn_radiation_type                  MoK\a
_diffrn_radiation_monochromator         graphite
_diffrn_radiation_probe                 x-ray
_diffrn_detector                        'CCD plate'
_diffrn_orient_matrix_type              'by Nonius Collect from scalepack cell'
_diffrn_orient_matrix_ub_11             -0.711434E-1
_diffrn_orient_matrix_ub_12             0.24599E-2
_diffrn_orient_matrix_ub_13             0.245785E-1
_diffrn_orient_matrix_ub_21             -0.564676E-1
_diffrn_orient_matrix_ub_22             0.20333E-1
_diffrn_orient_matrix_ub_23             -0.235497E-1
_diffrn_orient_matrix_ub_31             -0.363939E-1
_diffrn_orient_matrix_ub_32             -0.363567E-1
_diffrn_orient_matrix_ub_33             -0.115075E-1
_diffrn_measurement_device              '95mm CCD camera on \k-goniostat'
_diffrn_measurement_device_type         KappaCCD
_diffrn_measurement_method              'CCD rotation images, thick slices'
_diffrn_reflns_av_R_equivalents         0.0756
_diffrn_reflns_av_unetI/netI            0.0306
_diffrn_reflns_number                   100261
_diffrn_reflns_limit_h_min              -30
_diffrn_reflns_limit_h_max              31
_diffrn_reflns_limit_k_min              -35
_diffrn_reflns_limit_k_max              35
_diffrn_reflns_limit_l_min              -13
_diffrn_reflns_limit_l_max              13
_diffrn_reflns_theta_min                3.4
_diffrn_reflns_theta_max                27.87
_diffrn_reflns_theta_full               27.87
_diffrn_measured_fraction_theta_full
                                        0.993
_diffrn_measured_fraction_theta_max
                                        0.993
_reflns_number_total                    8250
_reflns_number_gt                       6962
_reflns_threshold_expression            >2sigma(I)
 
#----------------------------------------------------------------------------#
#                   COMPUTER PROGRAMS USED                                   #
#----------------------------------------------------------------------------#
 
_computing_data_collection              'Collect (Nonius BV, 1997-2000)'
_computing_cell_refinement
                                       'HKL Scalepack (Otwinowski & Minor 1997)'
_computing_data_reduction
                             'HKL Denzo and Scalepack (Otwinowski & Minor 1997)'
_computing_structure_solution           'SHELXS-97 (Sheldrick, 1997)'
_computing_structure_refinement         'SHELXL-97 (Sheldrick, 1997)'
_computing_molecular_graphics           'Ortep-3 for Windows (Farrugia, 1997)'
_computing_publication_material
                                   'WinGX publication routines (Farrugia, 1999)'
 
#----------------------------------------------------------------------------#
#                   REFINEMENT INFORMATION                                   #
#----------------------------------------------------------------------------#
 
_refine_special_details
;
 Two of the isopropyl groups are disordered over two positions and were
 refined with 1,2-SADI restraints

 Refinement of F^2^ against ALL reflections.  The weighted R-factor wR and
 goodness of fit S are based on F^2^, conventional R-factors R are based
 on F, with F set to zero for negative F^2^. The threshold expression of
 F^2^ > 2sigma(F^2^) is used only for calculating R-factors(gt) etc. and is
 not relevant to the choice of reflections for refinement.  R-factors based
 on F^2^ are statistically about twice as large as those based on F, and R-
 factors based on ALL data will be even larger.
;
_refine_ls_structure_factor_coef        Fsqd
_refine_ls_matrix_type                  full
_refine_ls_weighting_scheme             calc
_refine_ls_weighting_details
         'calc w=1/[\s^2^(Fo^2^)+(0.0240P)^2^+4.3481P] where P=(Fo^2^+2Fc^2^)/3'
_atom_sites_solution_primary            direct
_atom_sites_solution_secondary          difmap
_atom_sites_solution_hydrogens          geom
_refine_ls_hydrogen_treatment           constr
_refine_ls_extinction_method            none
_refine_ls_number_reflns                8250
_refine_ls_number_parameters            428
_refine_ls_number_restraints            13
_refine_ls_R_factor_all                 0.0437
_refine_ls_R_factor_gt                  0.031
_refine_ls_wR_factor_ref                0.0649
_refine_ls_wR_factor_gt                 0.0612
_refine_ls_goodness_of_fit_ref          1.063
_refine_ls_restrained_S_all             1.063
_refine_ls_shift/su_max                 0.004
_refine_ls_shift/su_mean                0
_refine_diff_density_max                0.483
_refine_diff_density_min                -0.449
_refine_diff_density_rms                0.07
 
#----------------------------------------------------------------------------#
#                   ATOMIC TYPES, COORDINATES AND THERMAL PARAMETERS         #
#----------------------------------------------------------------------------#
 
loop_
    _atom_type_symbol
    _atom_type_description
    _atom_type_scat_dispersion_real
    _atom_type_scat_dispersion_imag
    _atom_type_scat_source
C C 0.0033 0.0016 'International Tables Vol C Tables 4.2.6.8 and 6.1.1.4'
H H 0 0 'International Tables Vol C Tables 4.2.6.8 and 6.1.1.4'
Cl Cl 0.1484 0.1585 'International Tables Vol C Tables 4.2.6.8 and 6.1.1.4'
N N 0.0061 0.0033 'International Tables Vol C Tables 4.2.6.8 and 6.1.1.4'
Sn Sn -0.6537 1.4246 'International Tables Vol C Tables 4.2.6.8 and 6.1.1.4'
 
loop_
    _atom_site_label
    _atom_site_type_symbol
    _atom_site_fract_x
    _atom_site_fract_y
    _atom_site_fract_z
    _atom_site_U_iso_or_equiv
    _atom_site_adp_type
    _atom_site_occupancy
    _atom_site_symmetry_multiplicity
    _atom_site_calc_flag
    _atom_site_refinement_flags
    _atom_site_disorder_assembly
    _atom_site_disorder_group
Sn1 Sn 0.524649(7) 0.25 0.534326(17) 0.02088(5) Uani 1 2 d S . .
Sn2 Sn 0.680251(7) 0.25 0.759038(18) 0.02386(5) Uani 1 2 d S . .
Cl1 Cl 0.48218(3) 0.25 0.75577(6) 0.03071(15) Uani 1 2 d S . .
Cl2 Cl 0.72238(3) 0.25 0.98176(7) 0.03368(17) Uani 1 2 d S . .
N1 N 0.46505(6) 0.19701(6) 0.46397(15) 0.0219(3) Uani 1 1 d . . .
N2 N 0.74010(6) 0.19669(6) 0.69007(15) 0.0234(3) Uani 1 1 d . . .
C1 C 0.41002(8) 0.20483(7) 0.46499(18) 0.0250(4) Uani 1 1 d . . .
C2 C 0.38551(11) 0.25 0.4774(3) 0.0264(6) Uani 1 2 d S . .
H2 H 0.3468 0.25 0.497 0.032 Uiso 1 2 calc SR . .
C3 C 0.37132(9) 0.16253(9) 0.4496(3) 0.0414(6) Uani 1 1 d . . .
H3A H 0.3326 0.1734 0.4569 0.062 Uiso 1 1 calc R . .
H3B H 0.3791 0.1389 0.5182 0.062 Uiso 1 1 calc R . .
H3C H 0.3771 0.1478 0.3635 0.062 Uiso 1 1 calc R . .
C4 C 0.48731(8) 0.15078(7) 0.4261(2) 0.0272(4) Uani 1 1 d . A .
C5 C 0.50034(10) 0.14279(9) 0.2937(2) 0.0374(5) Uani 1 1 d D . .
C6 C 0.52425(11) 0.09885(10) 0.2602(3) 0.0528(7) Uani 1 1 d . A .
H6 H 0.5333 0.0927 0.1713 0.063 Uiso 1 1 calc R . .
C7 C 0.53499(11) 0.06423(10) 0.3525(3) 0.0545(7) Uani 1 1 d . . .
H7 H 0.5512 0.0345 0.327 0.065 Uiso 1 1 calc R A .
C8 C 0.52222(10) 0.07256(9) 0.4821(3) 0.0444(6) Uani 1 1 d . A .
H8 H 0.5297 0.0484 0.5454 0.053 Uiso 1 1 calc R . .
C9 C 0.49839(9) 0.11598(8) 0.5215(2) 0.0317(5) Uani 1 1 d . . .
C13 C 0.48735(10) 0.12417(8) 0.6662(2) 0.0365(5) Uani 1 1 d . A .
H13 H 0.4665 0.1551 0.6753 0.044 Uiso 1 1 calc R . .
C14 C 0.54263(12) 0.12935(10) 0.7393(3) 0.0543(7) Uani 1 1 d . . .
H14A H 0.5634 0.1567 0.7038 0.082 Uiso 1 1 calc R A .
H14B H 0.5647 0.1 0.7284 0.082 Uiso 1 1 calc R . .
H14C H 0.5353 0.1347 0.8325 0.082 Uiso 1 1 calc R . .
C15 C 0.45149(13) 0.08432(9) 0.7263(3) 0.0560(7) Uani 1 1 d . . .
H15A H 0.4708 0.0534 0.7174 0.084 Uiso 1 1 calc R A .
H15B H 0.4155 0.0828 0.6808 0.084 Uiso 1 1 calc R . .
H15C H 0.4452 0.0912 0.8192 0.084 Uiso 1 1 calc R . .
C16 C 0.79515(8) 0.20471(7) 0.68909(18) 0.0247(4) Uani 1 1 d . . .
C17 C 0.81949(11) 0.25 0.6998(3) 0.0270(6) Uani 1 2 d S . .
H17 H 0.8585 0.25 0.717 0.032 Uiso 1 2 calc SR . .
C18 C 0.83422(9) 0.16260(8) 0.6721(2) 0.0357(5) Uani 1 1 d . . .
H18A H 0.8729 0.1735 0.6823 0.054 Uiso 1 1 calc R . .
H18B H 0.8292 0.1488 0.5847 0.054 Uiso 1 1 calc R . .
H18C H 0.8259 0.1382 0.7384 0.054 Uiso 1 1 calc R . .
C19 C 0.71824(8) 0.15003(8) 0.65559(19) 0.0268(4) Uani 1 1 d . B .
C20 C 0.70110(10) 0.14177(8) 0.5256(2) 0.0369(5) Uani 1 1 d . . .
C21 C 0.67902(11) 0.09715(9) 0.4942(2) 0.0461(6) Uani 1 1 d . B .
H21 H 0.6678 0.091 0.4066 0.055 Uiso 1 1 calc R . .
C22 C 0.67292(10) 0.06158(9) 0.5865(2) 0.0438(6) Uani 1 1 d . . .
H22 H 0.6578 0.0313 0.5626 0.053 Uiso 1 1 calc R B .
C23 C 0.68892(9) 0.07026(8) 0.7139(2) 0.0372(5) Uani 1 1 d . B .
H23 H 0.6843 0.0458 0.7777 0.045 Uiso 1 1 calc R . .
C24 C 0.71178(8) 0.11422(8) 0.75064(19) 0.0296(4) Uani 1 1 d . . .
C28 C 0.72634(9) 0.12235(8) 0.8939(2) 0.0316(5) Uani 1 1 d . B .
H28 H 0.7477 0.1532 0.9003 0.038 Uiso 1 1 calc R . .
C29 C 0.67263(11) 0.12795(10) 0.9738(2) 0.0465(6) Uani 1 1 d . . .
H29A H 0.6501 0.0987 0.9659 0.07 Uiso 1 1 calc R B .
H29B H 0.6513 0.1554 0.9407 0.07 Uiso 1 1 calc R . .
H29C H 0.6821 0.1333 1.066 0.07 Uiso 1 1 calc R . .
C30 C 0.76306(11) 0.08221(9) 0.9498(2) 0.0441(6) Uani 1 1 d . . .
H30A H 0.7979 0.0803 0.8998 0.066 Uiso 1 1 calc R B .
H30B H 0.7432 0.0515 0.9437 0.066 Uiso 1 1 calc R . .
H30C H 0.7716 0.0891 1.0417 0.066 Uiso 1 1 calc R . .
C31 C 0.35384(11) 0.01391(9) 0.9618(3) 0.0499(7) Uani 1 1 d . . .
C32 C 0.32355(12) 0.04279(10) 1.0464(3) 0.0596(8) Uani 1 1 d . . .
H32 H 0.2879 0.0543 1.0206 0.072 Uiso 1 1 calc R . .
C33 C 0.34451(15) 0.05519(11) 1.1681(4) 0.0734(10) Uani 1 1 d . . .
H33 H 0.3229 0.0746 1.2253 0.088 Uiso 1 1 calc R . .
C34 C 0.39630(15) 0.03968(11) 1.2067(3) 0.0688(9) Uani 1 1 d . . .
H34 H 0.4108 0.0484 1.2898 0.083 Uiso 1 1 calc R . .
C35 C 0.42668(12) 0.01150(11) 1.1237(3) 0.0611(8) Uani 1 1 d . . .
H35 H 0.4627 0.0007 1.1496 0.073 Uiso 1 1 calc R . .
C36 C 0.40618(11) -0.00153(10) 1.0038(3) 0.0535(7) Uani 1 1 d . . .
H36 H 0.428 -0.0214 0.9483 0.064 Uiso 1 1 calc R . .
C37 C 0.33146(14) -0.00067(14) 0.8311(3) 0.0749(10) Uani 1 1 d . . .
H37A H 0.324 0.0281 0.7785 0.112 Uiso 0.5 1 calc PR . .
H37B H 0.2967 -0.0188 0.843 0.112 Uiso 0.5 1 calc PR . .
H37C H 0.3589 -0.0209 0.7861 0.112 Uiso 0.5 1 calc PR . .
H37D H 0.3291 -0.0358 0.8266 0.112 Uiso 0.5 1 calc PR . .
H37E H 0.3564 0.0111 0.7621 0.112 Uiso 0.5 1 calc PR . .
H37F H 0.2942 0.0132 0.8189 0.112 Uiso 0.5 1 calc PR . .
C10 C 0.4862(4) 0.1795(4) 0.1857(9) 0.040(3) Uani 0.582(18) 1 d PD A 1
H10 H 0.4723 0.2087 0.2325 0.048 Uiso 0.582(18) 1 calc PR A 1
C11 C 0.5377(3) 0.1966(5) 0.1057(7) 0.057(2) Uani 0.582(18) 1 d PD A 1
H11A H 0.5256 0.2194 0.0382 0.086 Uiso 0.582(18) 1 calc PR A 1
H11B H 0.5555 0.1688 0.064 0.086 Uiso 0.582(18) 1 calc PR A 1
H11C H 0.5644 0.2124 0.1643 0.086 Uiso 0.582(18) 1 calc PR A 1
C12 C 0.4402(4) 0.1659(4) 0.0892(10) 0.060(2) Uani 0.582(18) 1 d PD A 1
H12A H 0.435 0.192 0.0261 0.091 Uiso 0.582(18) 1 calc PR A 1
H12B H 0.4053 0.1605 0.137 0.091 Uiso 0.582(18) 1 calc PR A 1
H12C H 0.4508 0.1365 0.0427 0.091 Uiso 0.582(18) 1 calc PR A 1
C25 C 0.7134(6) 0.1807(5) 0.4153(9) 0.035(2) Uani 0.60(3) 1 d PD B 1
H25 H 0.7237 0.2117 0.4588 0.041 Uiso 0.60(3) 1 calc PR B 1
C26 C 0.6609(6) 0.1887(5) 0.3352(13) 0.053(3) Uani 0.60(3) 1 d PD B 1
H26A H 0.6303 0.1982 0.3933 0.08 Uiso 0.60(3) 1 calc PR B 1
H26B H 0.6509 0.159 0.2896 0.08 Uiso 0.60(3) 1 calc PR B 1
H26C H 0.6675 0.2142 0.2709 0.08 Uiso 0.60(3) 1 calc PR B 1
C27 C 0.7601(3) 0.1667(5) 0.3217(10) 0.053(2) Uani 0.60(3) 1 d PD B 1
H27A H 0.7948 0.1622 0.3709 0.079 Uiso 0.60(3) 1 calc PR B 1
H27B H 0.7653 0.1923 0.2568 0.079 Uiso 0.60(3) 1 calc PR B 1
H27C H 0.7502 0.1367 0.277 0.079 Uiso 0.60(3) 1 calc PR B 1
C10A C 0.4949(6) 0.1820(7) 0.1916(15) 0.047(4) Uani 0.418(18) 1 d PD A 2
H10A H 0.5026 0.2143 0.2302 0.056 Uiso 0.418(18) 1 calc PR A 2
C11A C 0.5366(5) 0.1701(6) 0.0817(8) 0.063(3) Uani 0.418(18) 1 d PD A 2
H11D H 0.5747 0.1752 0.1134 0.095 Uiso 0.418(18) 1 calc PR A 2
H11E H 0.5296 0.1911 0.0065 0.095 Uiso 0.418(18) 1 calc PR A 2
H11F H 0.532 0.1365 0.0552 0.095 Uiso 0.418(18) 1 calc PR A 2
C12A C 0.4350(6) 0.1784(5) 0.1441(15) 0.063(3) Uani 0.418(18) 1 d PD A 2
H12D H 0.4283 0.203 0.0772 0.095 Uiso 0.418(18) 1 calc PR A 2
H12E H 0.4096 0.1836 0.2179 0.095 Uiso 0.418(18) 1 calc PR A 2
H12F H 0.4285 0.1465 0.1067 0.095 Uiso 0.418(18) 1 calc PR A 2
C25A C 0.6955(6) 0.1798(8) 0.4300(17) 0.035(3) Uani 0.40(3) 1 d PD B 2
H25A H 0.6896 0.2103 0.4797 0.042 Uiso 0.40(3) 1 calc PR B 2
C26A C 0.6476(8) 0.1754(7) 0.3327(17) 0.041(3) Uani 0.40(3) 1 d PD B 2
H26D H 0.6486 0.2026 0.2719 0.061 Uiso 0.40(3) 1 calc PR B 2
H26E H 0.612 0.1754 0.3799 0.061 Uiso 0.40(3) 1 calc PR B 2
H26F H 0.6513 0.1453 0.2836 0.061 Uiso 0.40(3) 1 calc PR B 2
C27A C 0.7525(5) 0.1841(6) 0.3606(15) 0.051(3) Uani 0.40(3) 1 d PD B 2
H27D H 0.7504 0.2092 0.2933 0.077 Uiso 0.40(3) 1 calc PR B 2
H27E H 0.762 0.1534 0.3196 0.077 Uiso 0.40(3) 1 calc PR B 2
H27F H 0.7813 0.1926 0.4248 0.077 Uiso 0.40(3) 1 calc PR B 2
 
loop_
    _atom_site_aniso_label
    _atom_site_aniso_U_11
    _atom_site_aniso_U_22
    _atom_site_aniso_U_33
    _atom_site_aniso_U_23
    _atom_site_aniso_U_13
    _atom_site_aniso_U_12
Sn1 0.01578(9) 0.02573(10) 0.02112(9) 0 -0.00111(7) 0
Sn2 0.01587(9) 0.03313(11) 0.02258(10) 0 0.00123(7) 0
Cl1 0.0405(4) 0.0327(4) 0.0190(3) 0 0.0002(3) 0
Cl2 0.0431(4) 0.0384(4) 0.0196(3) 0 0.0003(3) 0
N1 0.0202(8) 0.0253(8) 0.0203(8) -0.0022(7) 0.0002(6) -0.0001(6)
N2 0.0210(8) 0.0301(9) 0.0191(8) -0.0018(7) -0.0001(7) -0.0002(7)
C1 0.0197(9) 0.0339(11) 0.0216(9) 0.0004(8) 0.0005(8) -0.0041(8)
C2 0.0152(12) 0.0386(17) 0.0254(14) 0 0.0018(11) 0
C3 0.0271(11) 0.0419(14) 0.0552(15) -0.0066(11) -0.0016(11) -0.0096(10)
C4 0.0226(10) 0.0269(11) 0.0323(11) -0.0103(8) -0.0009(8) -0.0016(8)
C5 0.0365(12) 0.0416(13) 0.0340(11) -0.0161(10) 0.0007(10) -0.0053(10)
C6 0.0572(17) 0.0519(17) 0.0494(15) -0.0288(13) 0.0075(13) -0.0012(13)
C7 0.0504(16) 0.0421(15) 0.0711(19) -0.0331(14) -0.0020(14) 0.0102(12)
C8 0.0439(14) 0.0314(12) 0.0579(16) -0.0108(11) -0.0100(12) 0.0079(11)
C9 0.0281(11) 0.0279(11) 0.0391(12) -0.0081(9) -0.0065(9) 0.0021(9)
C13 0.0456(13) 0.0273(12) 0.0366(12) 0.0017(9) -0.0037(10) 0.0077(10)
C14 0.0668(18) 0.0525(16) 0.0438(14) -0.0072(12) -0.0192(13) 0.0150(14)
C15 0.0685(18) 0.0356(14) 0.0639(18) 0.0125(12) 0.0091(15) 0.0112(13)
C16 0.0200(10) 0.0375(12) 0.0167(9) -0.0009(8) 0.0000(7) 0.0045(8)
C17 0.0175(13) 0.0394(17) 0.0241(13) 0 -0.0028(11) 0
C18 0.0267(11) 0.0400(13) 0.0403(13) 0.0015(10) 0.0015(9) 0.0079(9)
C19 0.0224(9) 0.0327(12) 0.0255(10) -0.0062(8) -0.0009(8) 0.0012(8)
C20 0.0440(13) 0.0401(13) 0.0266(11) -0.0071(10) -0.0072(10) 0.0046(10)
C21 0.0531(15) 0.0504(16) 0.0347(12) -0.0170(11) -0.0135(11) -0.0008(12)
C22 0.0415(14) 0.0406(14) 0.0494(14) -0.0149(11) -0.0064(11) -0.0103(11)
C23 0.0357(12) 0.0354(13) 0.0405(12) -0.0055(10) 0.0014(10) -0.0102(10)
C24 0.0238(10) 0.0354(12) 0.0296(10) -0.0049(9) 0.0022(9) -0.0043(9)
C28 0.0377(12) 0.0313(12) 0.0257(10) 0.0011(9) -0.0009(9) -0.0112(9)
C29 0.0538(15) 0.0520(16) 0.0338(13) -0.0040(11) 0.0130(11) -0.0117(12)
C30 0.0529(15) 0.0373(13) 0.0420(13) 0.0059(10) -0.0108(12) -0.0107(11)
C31 0.0463(15) 0.0406(14) 0.0629(17) 0.0186(13) 0.0063(13) -0.0059(12)
C32 0.0473(16) 0.0379(15) 0.094(2) 0.0142(15) 0.0066(16) 0.0035(12)
C33 0.076(2) 0.0402(17) 0.104(3) -0.0150(17) 0.020(2) -0.0047(16)
C34 0.078(2) 0.0495(18) 0.079(2) -0.0034(16) -0.0017(19) -0.0199(17)
C35 0.0513(17) 0.0464(17) 0.086(2) 0.0089(16) -0.0099(16) -0.0044(13)
C36 0.0448(15) 0.0428(16) 0.0730(19) 0.0057(13) 0.0111(14) 0.0017(12)
C37 0.070(2) 0.094(3) 0.061(2) 0.0239(18) 0.0010(17) -0.0137(19)
C10 0.057(5) 0.041(5) 0.022(4) -0.011(3) 0.010(4) -0.012(4)
C11 0.053(3) 0.078(6) 0.041(3) 0.012(4) -0.003(2) 0.004(3)
C12 0.053(4) 0.091(5) 0.038(4) 0.008(4) -0.012(3) -0.003(3)
C25 0.044(6) 0.045(3) 0.015(3) -0.004(2) 0.000(4) 0.002(5)
C26 0.046(6) 0.067(7) 0.046(4) 0.002(4) 0.000(4) 0.022(4)
C27 0.045(3) 0.077(6) 0.036(4) 0.006(4) 0.004(3) 0.010(3)
C10A 0.049(6) 0.059(9) 0.032(7) -0.016(6) -0.003(5) -0.012(6)
C11A 0.099(7) 0.063(7) 0.028(3) 0.001(4) 0.022(4) 0.022(6)
C12A 0.079(7) 0.070(7) 0.042(6) 0.016(5) -0.019(6) -0.003(5)
C25A 0.028(6) 0.051(5) 0.027(4) -0.011(3) 0.009(4) -0.009(5)
C26A 0.042(6) 0.053(7) 0.027(4) -0.004(4) -0.007(4) 0.004(5)
C27A 0.062(6) 0.061(7) 0.031(5) 0.008(4) 0.010(5) 0.008(5)
 
 
#----------------------------------------------------------------------------#
#                   MOLECULAR GEOMETRY                                       #
#----------------------------------------------------------------------------#
 
_geom_special_details
;
 All esds (except the esd in the dihedral angle between two l.s. planes)
 are estimated using the full covariance matrix.  The cell esds are taken
 into account individually in the estimation of esds in distances, angles
 and torsion angles; correlations between esds in cell parameters are only
 used when they are defined by crystal symmetry.  An approximate (isotropic)
 treatment of cell esds is used for estimating esds involving l.s. planes.
;
loop_
    _geom_bond_atom_site_label_1
    _geom_bond_atom_site_label_2
    _geom_bond_distance
    _geom_bond_site_symmetry_2
    _geom_bond_publ_flag
Sn1 N1 2.1753(15) . ?
Sn1 N1 2.1753(15) 8_565 ?
Sn1 Cl1 2.4814(7) . ?
Sn2 N2 2.1805(16) . ?
Sn2 N2 2.1805(16) 8_565 ?
Sn2 Cl2 2.4901(7) . ?
N1 C1 1.337(2) . ?
N1 C4 1.445(2) . ?
N2 C16 1.338(2) . ?
N2 C19 1.444(3) . ?
C1 C2 1.393(2) . ?
C1 C3 1.507(3) . ?
C2 C1 1.393(2) 8_565 ?
C2 H2 0.95 . ?
C3 H3A 0.98 . ?
C3 H3B 0.98 . ?
C3 H3C 0.98 . ?
C4 C9 1.399(3) . ?
C4 C5 1.407(3) . ?
C5 C6 1.393(3) . ?
C5 C10A 1.515(13) . ?
C5 C10 1.543(8) . ?
C6 C7 1.373(4) . ?
C6 H6 0.95 . ?
C7 C8 1.379(4) . ?
C7 H7 0.95 . ?
C8 C9 1.396(3) . ?
C8 H8 0.95 . ?
C9 C13 1.519(3) . ?
C13 C14 1.528(3) . ?
C13 C15 1.532(3) . ?
C13 H13 1 . ?
C14 H14A 0.98 . ?
C14 H14B 0.98 . ?
C14 H14C 0.98 . ?
C15 H15A 0.98 . ?
C15 H15B 0.98 . ?
C15 H15C 0.98 . ?
C16 C17 1.393(2) . ?
C16 C18 1.510(3) . ?
C17 C16 1.393(2) 8_565 ?
C17 H17 0.95 . ?
C18 H18A 0.98 . ?
C18 H18B 0.98 . ?
C18 H18C 0.98 . ?
C19 C24 1.400(3) . ?
C19 C20 1.410(3) . ?
C20 C21 1.388(3) . ?
C20 C25A 1.45(2) . ?
C20 C25 1.591(12) . ?
C21 C22 1.375(4) . ?
C21 H21 0.95 . ?
C22 C23 1.379(3) . ?
C22 H22 0.95 . ?
C23 C24 1.392(3) . ?
C23 H23 0.95 . ?
C24 C28 1.522(3) . ?
C28 C29 1.532(3) . ?
C28 C30 1.533(3) . ?
C28 H28 1 . ?
C29 H29A 0.98 . ?
C29 H29B 0.98 . ?
C29 H29C 0.98 . ?
C30 H30A 0.98 . ?
C30 H30B 0.98 . ?
C30 H30C 0.98 . ?
C31 C32 1.386(4) . ?
C31 C36 1.394(4) . ?
C31 C37 1.495(4) . ?
C32 C33 1.385(5) . ?
C32 H32 0.95 . ?
C33 C34 1.372(5) . ?
C33 H33 0.95 . ?
C34 C35 1.366(4) . ?
C34 H34 0.95 . ?
C35 C36 1.369(4) . ?
C35 H35 0.95 . ?
C36 H36 0.95 . ?
C37 H37A 0.98 . ?
C37 H37B 0.98 . ?
C37 H37C 0.98 . ?
C37 H37D 0.98 . ?
C37 H37E 0.98 . ?
C37 H37F 0.98 . ?
C10 C12 1.527(10) . ?
C10 C11 1.553(9) . ?
C10 H10 1 . ?
C11 H11A 0.98 . ?
C11 H11B 0.98 . ?
C11 H11C 0.98 . ?
C12 H12A 0.98 . ?
C12 H12B 0.98 . ?
C12 H12C 0.98 . ?
C25 C26 1.519(9) . ?
C25 C27 1.522(7) . ?
C25 H25 1 . ?
C26 H26A 0.98 . ?
C26 H26B 0.98 . ?
C26 H26C 0.98 . ?
C27 H27A 0.98 . ?
C27 H27B 0.98 . ?
C27 H27C 0.98 . ?
C10A C12A 1.518(12) . ?
C10A C11A 1.539(13) . ?
C10A H10A 1 . ?
C11A H11D 0.98 . ?
C11A H11E 0.98 . ?
C11A H11F 0.98 . ?
C12A H12D 0.98 . ?
C12A H12E 0.98 . ?
C12A H12F 0.98 . ?
C25A C26A 1.524(12) . ?
C25A C27A 1.545(10) . ?
C25A H25A 1 . ?
C26A H26D 0.98 . ?
C26A H26E 0.98 . ?
C26A H26F 0.98 . ?
C27A H27D 0.98 . ?
C27A H27E 0.98 . ?
C27A H27F 0.98 . ?
 
loop_
    _geom_angle_atom_site_label_1
    _geom_angle_atom_site_label_2
    _geom_angle_atom_site_label_3
    _geom_angle
    _geom_angle_site_symmetry_1
    _geom_angle_site_symmetry_3
    _geom_angle_publ_flag
N1 Sn1 N1 85.37(8) . 8_565 ?
N1 Sn1 Cl1 91.84(4) . . ?
N1 Sn1 Cl1 91.84(4) 8_565 . ?
N2 Sn2 N2 85.75(8) . 8_565 ?
N2 Sn2 Cl2 91.65(4) . . ?
N2 Sn2 Cl2 91.65(4) 8_565 . ?
C1 N1 C4 120.74(16) . . ?
C1 N1 Sn1 122.33(13) . . ?
C4 N1 Sn1 116.71(11) . . ?
C16 N2 C19 120.38(16) . . ?
C16 N2 Sn2 122.51(13) . . ?
C19 N2 Sn2 116.89(12) . . ?
N1 C1 C2 124.31(19) . . ?
N1 C1 C3 118.63(18) . . ?
C2 C1 C3 117.05(18) . . ?
C1 C2 C1 128.9(3) . 8_565 ?
C1 C2 H2 115.6 . . ?
C1 C2 H2 115.6 8_565 . ?
C1 C3 H3A 109.5 . . ?
C1 C3 H3B 109.5 . . ?
H3A C3 H3B 109.5 . . ?
C1 C3 H3C 109.5 . . ?
H3A C3 H3C 109.5 . . ?
H3B C3 H3C 109.5 . . ?
C9 C4 C5 121.2(2) . . ?
C9 C4 N1 119.99(18) . . ?
C5 C4 N1 118.68(19) . . ?
C6 C5 C4 117.8(2) . . ?
C6 C5 C10A 119.8(7) . . ?
C4 C5 C10A 122.0(8) . . ?
C6 C5 C10 119.7(5) . . ?
C4 C5 C10 122.4(5) . . ?
C7 C6 C5 121.6(2) . . ?
C7 C6 H6 119.2 . . ?
C5 C6 H6 119.2 . . ?
C6 C7 C8 120.0(2) . . ?
C6 C7 H7 120 . . ?
C8 C7 H7 120 . . ?
C7 C8 C9 120.9(2) . . ?
C7 C8 H8 119.6 . . ?
C9 C8 H8 119.6 . . ?
C8 C9 C4 118.4(2) . . ?
C8 C9 C13 118.8(2) . . ?
C4 C9 C13 122.74(19) . . ?
C9 C13 C14 109.8(2) . . ?
C9 C13 C15 112.3(2) . . ?
C14 C13 C15 111.0(2) . . ?
C9 C13 H13 107.8 . . ?
C14 C13 H13 107.8 . . ?
C15 C13 H13 107.8 . . ?
C13 C14 H14A 109.5 . . ?
C13 C14 H14B 109.5 . . ?
H14A C14 H14B 109.5 . . ?
C13 C14 H14C 109.5 . . ?
H14A C14 H14C 109.5 . . ?
H14B C14 H14C 109.5 . . ?
C13 C15 H15A 109.5 . . ?
C13 C15 H15B 109.5 . . ?
H15A C15 H15B 109.5 . . ?
C13 C15 H15C 109.5 . . ?
H15A C15 H15C 109.5 . . ?
H15B C15 H15C 109.5 . . ?
N2 C16 C17 124.27(19) . . ?
N2 C16 C18 118.87(18) . . ?
C17 C16 C18 116.85(18) . . ?
C16 C17 C16 129.6(3) . 8_565 ?
C16 C17 H17 115.2 . . ?
C16 C17 H17 115.2 8_565 . ?
C16 C18 H18A 109.5 . . ?
C16 C18 H18B 109.5 . . ?
H18A C18 H18B 109.5 . . ?
C16 C18 H18C 109.5 . . ?
H18A C18 H18C 109.5 . . ?
H18B C18 H18C 109.5 . . ?
C24 C19 C20 120.4(2) . . ?
C24 C19 N2 120.72(17) . . ?
C20 C19 N2 118.84(19) . . ?
C21 C20 C19 118.4(2) . . ?
C21 C20 C25A 117.6(7) . . ?
C19 C20 C25A 123.0(8) . . ?
C21 C20 C25 121.1(5) . . ?
C19 C20 C25 120.2(5) . . ?
C22 C21 C20 121.7(2) . . ?
C22 C21 H21 119.1 . . ?
C20 C21 H21 119.1 . . ?
C21 C22 C23 119.5(2) . . ?
C21 C22 H22 120.3 . . ?
C23 C22 H22 120.3 . . ?
C22 C23 C24 121.2(2) . . ?
C22 C23 H23 119.4 . . ?
C24 C23 H23 119.4 . . ?
C23 C24 C19 118.79(19) . . ?
C23 C24 C28 118.72(19) . . ?
C19 C24 C28 122.42(18) . . ?
C24 C28 C29 109.58(18) . . ?
C24 C28 C30 112.45(19) . . ?
C29 C28 C30 110.96(19) . . ?
C24 C28 H28 107.9 . . ?
C29 C28 H28 107.9 . . ?
C30 C28 H28 107.9 . . ?
C28 C29 H29A 109.5 . . ?
C28 C29 H29B 109.5 . . ?
H29A C29 H29B 109.5 . . ?
C28 C29 H29C 109.5 . . ?
H29A C29 H29C 109.5 . . ?
H29B C29 H29C 109.5 . . ?
C28 C30 H30A 109.5 . . ?
C28 C30 H30B 109.5 . . ?
H30A C30 H30B 109.5 . . ?
C28 C30 H30C 109.5 . . ?
H30A C30 H30C 109.5 . . ?
H30B C30 H30C 109.5 . . ?
C32 C31 C36 117.3(3) . . ?
C32 C31 C37 121.8(3) . . ?
C36 C31 C37 121.0(3) . . ?
C33 C32 C31 121.0(3) . . ?
C33 C32 H32 119.5 . . ?
C31 C32 H32 119.5 . . ?
C34 C33 C32 120.5(3) . . ?
C34 C33 H33 119.7 . . ?
C32 C33 H33 119.7 . . ?
C35 C34 C33 119.0(3) . . ?
C35 C34 H34 120.5 . . ?
C33 C34 H34 120.5 . . ?
C34 C35 C36 121.1(3) . . ?
C34 C35 H35 119.4 . . ?
C36 C35 H35 119.4 . . ?
C35 C36 C31 121.1(3) . . ?
C35 C36 H36 119.4 . . ?
C31 C36 H36 119.4 . . ?
C31 C37 H37A 109.5 . . ?
C31 C37 H37B 109.5 . . ?
H37A C37 H37B 109.5 . . ?
C31 C37 H37C 109.5 . . ?
H37A C37 H37C 109.5 . . ?
H37B C37 H37C 109.5 . . ?
C31 C37 H37D 109.5 . . ?
H37A C37 H37D 141.1 . . ?
H37B C37 H37D 56.3 . . ?
H37C C37 H37D 56.3 . . ?
C31 C37 H37E 109.5 . . ?
H37A C37 H37E 56.3 . . ?
H37B C37 H37E 141.1 . . ?
H37C C37 H37E 56.3 . . ?
H37D C37 H37E 109.5 . . ?
C31 C37 H37F 109.5 . . ?
H37A C37 H37F 56.3 . . ?
H37B C37 H37F 56.3 . . ?
H37C C37 H37F 141.1 . . ?
H37D C37 H37F 109.5 . . ?
H37E C37 H37F 109.5 . . ?
C12 C10 C5 117.1(8) . . ?
C12 C10 C11 108.0(7) . . ?
C5 C10 C11 113.9(6) . . ?
C12 C10 H10 105.6 . . ?
C5 C10 H10 105.6 . . ?
C11 C10 H10 105.6 . . ?
C10 C11 H11A 109.5 . . ?
C10 C11 H11B 109.5 . . ?
H11A C11 H11B 109.5 . . ?
C10 C11 H11C 109.5 . . ?
H11A C11 H11C 109.5 . . ?
H11B C11 H11C 109.5 . . ?
C10 C12 H12A 109.5 . . ?
C10 C12 H12B 109.5 . . ?
H12A C12 H12B 109.5 . . ?
C10 C12 H12C 109.5 . . ?
H12A C12 H12C 109.5 . . ?
H12B C12 H12C 109.5 . . ?
C26 C25 C27 107.9(8) . . ?
C26 C25 C20 109.2(8) . . ?
C27 C25 C20 114.0(8) . . ?
C26 C25 H25 108.5 . . ?
C27 C25 H25 108.5 . . ?
C20 C25 H25 108.5 . . ?
C25 C26 H26A 109.5 . . ?
C25 C26 H26B 109.5 . . ?
H26A C26 H26B 109.5 . . ?
C25 C26 H26C 109.5 . . ?
H26A C26 H26C 109.5 . . ?
H26B C26 H26C 109.5 . . ?
C25 C27 H27A 109.5 . . ?
C25 C27 H27B 109.5 . . ?
H27A C27 H27B 109.5 . . ?
C25 C27 H27C 109.5 . . ?
H27A C27 H27C 109.5 . . ?
H27B C27 H27C 109.5 . . ?
C5 C10A C12A 104.8(11) . . ?
C5 C10A C11A 107.0(10) . . ?
C12A C10A C11A 111.5(14) . . ?
C5 C10A H10A 111.1 . . ?
C12A C10A H10A 111.1 . . ?
C11A C10A H10A 111.1 . . ?
C10A C11A H11D 109.5 . . ?
C10A C11A H11E 109.5 . . ?
H11D C11A H11E 109.5 . . ?
C10A C11A H11F 109.5 . . ?
H11D C11A H11F 109.5 . . ?
H11E C11A H11F 109.5 . . ?
C10A C12A H12D 109.5 . . ?
C10A C12A H12E 109.5 . . ?
H12D C12A H12E 109.5 . . ?
C10A C12A H12F 109.5 . . ?
H12D C12A H12F 109.5 . . ?
H12E C12A H12F 109.5 . . ?
C20 C25A C26A 116.9(13) . . ?
C20 C25A C27A 106.6(12) . . ?
C26A C25A C27A 111.9(13) . . ?
C20 C25A H25A 107 . . ?
C26A C25A H25A 107 . . ?
C27A C25A H25A 107 . . ?
C25A C26A H26D 109.5 . . ?
C25A C26A H26E 109.5 . . ?
H26D C26A H26E 109.5 . . ?
C25A C26A H26F 109.5 . . ?
H26D C26A H26F 109.5 . . ?
H26E C26A H26F 109.5 . . ?
C25A C27A H27D 109.5 . . ?
C25A C27A H27E 109.5 . . ?
H27D C27A H27E 109.5 . . ?
C25A C27A H27F 109.5 . . ?
H27D C27A H27F 109.5 . . ?
H27E C27A H27F 109.5 . . ?
 
#===END

data_(Ph2PPPh2)-aug811
 
_audit_creation_date            2011-09-07T09:44:15-00:00
_audit_creation_method         'WinGX routine CIF_UPDATE'
_audit_conform_dict_name        cif_core.dic
_audit_conform_dict_version     2.2
_audit_conform_dict_location    ftp://ftp.iucr.org/pub/cif_core.dic
_publ_requested_category        FO
 
#----------------------------------------------------------------------------#
#                   CHEMICAL INFORMATION                                     #
#----------------------------------------------------------------------------#
 
_chemical_name_systematic
;
 ?
;
_chemical_formula_moiety                'C24 H20 P2'
_chemical_formula_sum                   'C24 H20 P2'
_chemical_formula_weight                370.34
_chemical_compound_source               'synthesis as described'
 
#----------------------------------------------------------------------------#
#                   UNIT CELL INFORMATION                                    #
#----------------------------------------------------------------------------#
 
_symmetry_cell_setting                  monoclinic
_symmetry_space_group_name_H-M          'P 21/C'
_symmetry_space_group_name_Hall         '-P 2y bc'
_symmetry_Int_Tables_number             14
loop_
    _symmetry_equiv_pos_as_xyz
'x, y, z'
'-x, y+1/2, -z+1/2'
'-x, -y, -z'
'x, -y-1/2, z-1/2'
 
_cell_length_a                          6.1617(3)
_cell_length_b                          7.3499(4)
_cell_length_c                          21.8665(8)
_cell_angle_alpha                       90
_cell_angle_beta                        105.948(3)
_cell_angle_gamma                       90
_cell_volume                            952.17(8)
_cell_formula_units_Z                   2
_cell_measurement_temperature           173(2)
_cell_measurement_reflns_used           10247
_cell_measurement_theta_min             3.395
_cell_measurement_theta_max             27.103
_cell_measurement_wavelength            0.71073
 
#----------------------------------------------------------------------------#
#                   CRYSTAL INFORMATION                                      #
#----------------------------------------------------------------------------#
 
_exptl_crystal_description              Blade
_exptl_crystal_colour                   Colourless
_exptl_crystal_size_max                 0.21
_exptl_crystal_size_mid                 0.11
_exptl_crystal_size_min                 0.09
_exptl_crystal_density_diffrn           1.292
_exptl_crystal_density_method           'not measured'
_exptl_crystal_F_000                    388
_exptl_special_details
;
 ?
;
 
#----------------------------------------------------------------------------#
#                   ABSORPTION CORRECTION                                    #
#----------------------------------------------------------------------------#
 
_exptl_absorpt_coefficient_mu           0.233
_exptl_absorpt_correction_type          multi-scan
_exptl_absorpt_process_details
;
        [c.f. r.h. blessing, acta cryst. (1995), a51, 33-38]
;
_exptl_absorpt_correction_T_min         0.9354
_exptl_absorpt_correction_T_max         1.003
 
#----------------------------------------------------------------------------#
#                   DATA COLLECTION                                          #
#----------------------------------------------------------------------------#
 
_diffrn_source                          'Enraf Nonius FR590'
_diffrn_ambient_temperature             173(2)
_diffrn_radiation_wavelength            0.71073
_diffrn_radiation_type                  MoK\a
_diffrn_radiation_monochromator         graphite
_diffrn_radiation_probe                 x-ray
_diffrn_detector                        'CCD plate'
_diffrn_orient_matrix_type
                                     'by Bruker AXS Collect from scalepack cell'
_diffrn_orient_matrix_ub_11             -0.143944
_diffrn_orient_matrix_ub_12             -0.619778E-1
_diffrn_orient_matrix_ub_13             0.33353E-2
_diffrn_orient_matrix_ub_21             -0.749539E-1
_diffrn_orient_matrix_ub_22             0.119434
_diffrn_orient_matrix_ub_23             -0.62015E-2
_diffrn_orient_matrix_ub_31             -0.1523E-2
_diffrn_orient_matrix_ub_32             -0.201407E-1
_diffrn_orient_matrix_ub_33             -0.470387E-1
_diffrn_measurement_device              '95mm CCD camera on \k-goniostat'
_diffrn_measurement_device_type         KappaCCD
_diffrn_measurement_method              'CCD rotation images, thick slices'
_diffrn_reflns_av_R_equivalents         0.069
_diffrn_reflns_av_unetI/netI            0.0436
_diffrn_reflns_number                   11493
_diffrn_reflns_limit_h_min              -7
_diffrn_reflns_limit_h_max              7
_diffrn_reflns_limit_k_min              -9
_diffrn_reflns_limit_k_max              9
_diffrn_reflns_limit_l_min              -27
_diffrn_reflns_limit_l_max              27
_diffrn_reflns_theta_min                3.44
_diffrn_reflns_theta_max                27.11
_diffrn_reflns_theta_full               27.11
_diffrn_measured_fraction_theta_full
                                        0.997
_diffrn_measured_fraction_theta_max
                                        0.997
_reflns_number_total                    2102
_reflns_number_gt                       1709
_reflns_threshold_expression            >2sigma(I)
 
#----------------------------------------------------------------------------#
#                   COMPUTER PROGRAMS USED                                   #
#----------------------------------------------------------------------------#
 
_computing_data_collection              'Collect (Bruker AXS BV, 1997-2004)'
_computing_cell_refinement
                                       'HKL Scalepack (Otwinowski & Minor 1997)'
_computing_data_reduction
                             'HKL Denzo and Scalepack (Otwinowski & Minor 1997)'
_computing_structure_solution           'SHELXS-97 (Sheldrick, 1997)'
_computing_structure_refinement         'SHELXL-97 (Sheldrick, 1997)'
_computing_molecular_graphics           'Ortep-3 for Windows (Farrugia, 1997)'
_computing_publication_material
                                   'WinGX publication routines (Farrugia, 1999)'
 
#----------------------------------------------------------------------------#
#                   REFINEMENT INFORMATION                                   #
#----------------------------------------------------------------------------#
 
_refine_special_details
;
 Refinement of F^2^ against ALL reflections.  The weighted R-factor wR and
 goodness of fit S are based on F^2^, conventional R-factors R are based
 on F, with F set to zero for negative F^2^. The threshold expression of
 F^2^ > 2sigma(F^2^) is used only for calculating R-factors(gt) etc. and is
 not relevant to the choice of reflections for refinement.  R-factors based
 on F^2^ are statistically about twice as large as those based on F, and R-
 factors based on ALL data will be even larger.
;
_refine_ls_structure_factor_coef        Fsqd
_refine_ls_matrix_type                  full
_refine_ls_weighting_scheme             calc
_refine_ls_weighting_details
         'calc w=1/[\s^2^(Fo^2^)+(0.0372P)^2^+0.4590P] where P=(Fo^2^+2Fc^2^)/3'
_atom_sites_solution_primary            direct
_atom_sites_solution_secondary          difmap
_atom_sites_solution_hydrogens          difmap
_refine_ls_hydrogen_treatment           refall
_refine_ls_extinction_method            none
_refine_ls_number_reflns                2102
_refine_ls_number_parameters            158
_refine_ls_number_restraints            0
_refine_ls_R_factor_all                 0.0524
_refine_ls_R_factor_gt                  0.0378
_refine_ls_wR_factor_ref                0.0894
_refine_ls_wR_factor_gt                 0.0836
_refine_ls_goodness_of_fit_ref          1.001
_refine_ls_restrained_S_all             1.001
_refine_ls_shift/su_max                 0.001
_refine_ls_shift/su_mean                0
_refine_diff_density_max                0.296
_refine_diff_density_min                -0.218
_refine_diff_density_rms                0.05
 
#----------------------------------------------------------------------------#
#                   ATOMIC TYPES, COORDINATES AND THERMAL PARAMETERS         #
#----------------------------------------------------------------------------#
 
loop_
    _atom_type_symbol
    _atom_type_description
    _atom_type_scat_dispersion_real
    _atom_type_scat_dispersion_imag
    _atom_type_scat_source
C C 0.0033 0.0016 'International Tables Vol C Tables 4.2.6.8 and 6.1.1.4'
H H 0 0 'International Tables Vol C Tables 4.2.6.8 and 6.1.1.4'
P P 0.1023 0.0942 'International Tables Vol C Tables 4.2.6.8 and 6.1.1.4'
 
loop_
    _atom_site_label
    _atom_site_type_symbol
    _atom_site_fract_x
    _atom_site_fract_y
    _atom_site_fract_z
    _atom_site_U_iso_or_equiv
    _atom_site_adp_type
    _atom_site_occupancy
    _atom_site_symmetry_multiplicity
    _atom_site_calc_flag
    _atom_site_refinement_flags
    _atom_site_disorder_assembly
    _atom_site_disorder_group
P P 0.47302(7) 0.15124(6) 0.50161(2) 0.02320(14) Uani 1 1 d . . .
C1 C 0.6881(3) 0.1976(2) 0.57671(8) 0.0222(4) Uani 1 1 d . . .
C2 C 0.6205(3) 0.3034(2) 0.62107(8) 0.0263(4) Uani 1 1 d . . .
H2 H 0.474(3) 0.355(2) 0.6100(8) 0.026(5) Uiso 1 1 d . . .
C3 C 0.7644(3) 0.3332(3) 0.68115(8) 0.0322(4) Uani 1 1 d . . .
H3 H 0.716(3) 0.407(3) 0.7123(9) 0.040(6) Uiso 1 1 d . . .
C4 C 0.9782(3) 0.2577(3) 0.69775(9) 0.0331(4) Uani 1 1 d . . .
H4 H 1.072(3) 0.277(3) 0.7393(10) 0.045(6) Uiso 1 1 d . . .
C5 C 1.0501(3) 0.1548(3) 0.65380(9) 0.0311(4) Uani 1 1 d . . .
H5 H 1.200(3) 0.103(3) 0.6658(9) 0.033(5) Uiso 1 1 d . . .
C6 C 0.9068(3) 0.1247(2) 0.59370(9) 0.0271(4) Uani 1 1 d . . .
H6 H 0.959(3) 0.054(3) 0.5645(9) 0.030(5) Uiso 1 1 d . . .
C7 C 0.6064(3) 0.2222(2) 0.43972(8) 0.0240(4) Uani 1 1 d . . .
C8 C 0.8159(3) 0.3084(2) 0.45172(9) 0.0268(4) Uani 1 1 d . . .
H8 H 0.899(3) 0.328(2) 0.4919(9) 0.026(5) Uiso 1 1 d . . .
C9 C 0.8983(3) 0.3680(2) 0.40211(9) 0.0297(4) Uani 1 1 d . . .
H9 H 1.043(3) 0.426(3) 0.4110(8) 0.033(5) Uiso 1 1 d . . .
C10 C 0.7747(3) 0.3406(2) 0.33955(9) 0.0313(4) Uani 1 1 d . . .
H10 H 0.839(3) 0.383(3) 0.3050(9) 0.036(5) Uiso 1 1 d . . .
C11 C 0.5669(3) 0.2554(3) 0.32694(9) 0.0312(4) Uani 1 1 d . . .
H11 H 0.485(3) 0.237(3) 0.2848(9) 0.033(5) Uiso 1 1 d . . .
C12 C 0.4817(3) 0.1990(2) 0.37614(8) 0.0286(4) Uani 1 1 d . . .
H12 H 0.336(3) 0.140(3) 0.3657(9) 0.033(5) Uiso 1 1 d . . .
 
loop_
    _atom_site_aniso_label
    _atom_site_aniso_U_11
    _atom_site_aniso_U_22
    _atom_site_aniso_U_33
    _atom_site_aniso_U_23
    _atom_site_aniso_U_13
    _atom_site_aniso_U_12
P 0.0196(2) 0.0262(2) 0.0237(2) -0.00042(18) 0.00570(17) -0.00092(17)
C1 0.0218(8) 0.0217(8) 0.0223(8) 0.0020(6) 0.0049(7) -0.0027(6)
C2 0.0265(9) 0.0257(9) 0.0284(9) 0.0032(7) 0.0104(7) 0.0016(7)
C3 0.0384(11) 0.0353(10) 0.0254(9) 0.0001(8) 0.0132(8) -0.0018(8)
C4 0.0341(10) 0.0381(11) 0.0234(9) 0.0059(8) 0.0020(8) -0.0074(8)
C5 0.0226(9) 0.0299(10) 0.0384(10) 0.0080(8) 0.0043(8) -0.0013(8)
C6 0.0250(9) 0.0243(9) 0.0325(9) -0.0011(7) 0.0087(8) 0.0001(7)
C7 0.0238(8) 0.0207(8) 0.0280(9) 0.0016(7) 0.0082(7) 0.0028(6)
C8 0.0265(9) 0.0261(9) 0.0272(9) -0.0017(7) 0.0063(8) -0.0026(7)
C9 0.0269(9) 0.0286(10) 0.0359(10) -0.0024(8) 0.0128(8) -0.0042(7)
C10 0.0375(10) 0.0288(9) 0.0325(9) 0.0014(8) 0.0179(8) -0.0001(8)
C11 0.0349(10) 0.0336(10) 0.0235(9) 0.0008(8) 0.0050(8) -0.0010(8)
C12 0.0259(9) 0.0313(10) 0.0270(9) 0.0020(7) 0.0045(7) -0.0026(7)
 
 
#----------------------------------------------------------------------------#
#                   MOLECULAR GEOMETRY                                       #
#----------------------------------------------------------------------------#
 
_geom_special_details
;
 All esds (except the esd in the dihedral angle between two l.s. planes)
 are estimated using the full covariance matrix.  The cell esds are taken
 into account individually in the estimation of esds in distances, angles
 and torsion angles; correlations between esds in cell parameters are only
 used when they are defined by crystal symmetry.  An approximate (isotropic)
 treatment of cell esds is used for estimating esds involving l.s. planes.
;
loop_
    _geom_bond_atom_site_label_1
    _geom_bond_atom_site_label_2
    _geom_bond_distance
    _geom_bond_site_symmetry_2
    _geom_bond_publ_flag
P C1 1.8365(17) . ?
P C7 1.8412(17) . ?
P P 2.2519(9) 3_656 ?
C1 C2 1.393(2) . ?
C1 C6 1.402(2) . ?
C2 C3 1.386(2) . ?
C2 H2 0.948(18) . ?
C3 C4 1.383(3) . ?
C3 H3 0.98(2) . ?
C4 C5 1.388(3) . ?
C4 H4 0.94(2) . ?
C5 C6 1.385(2) . ?
C5 H5 0.966(19) . ?
C6 H6 0.95(2) . ?
C7 C8 1.397(2) . ?
C7 C12 1.402(2) . ?
C8 C9 1.389(2) . ?
C8 H8 0.899(19) . ?
C9 C10 1.385(3) . ?
C9 H9 0.95(2) . ?
C10 C11 1.384(3) . ?
C10 H10 0.992(19) . ?
C11 C12 1.384(3) . ?
C11 H11 0.93(2) . ?
C12 H12 0.968(19) . ?
 
loop_
    _geom_angle_atom_site_label_1
    _geom_angle_atom_site_label_2
    _geom_angle_atom_site_label_3
    _geom_angle
    _geom_angle_site_symmetry_1
    _geom_angle_site_symmetry_3
    _geom_angle_publ_flag
C1 P C7 104.28(8) . . ?
C1 P P 97.74(6) . 3_656 ?
C7 P P 99.03(6) . 3_656 ?
C2 C1 C6 118.56(15) . . ?
C2 C1 P 116.48(13) . . ?
C6 C1 P 124.81(13) . . ?
C3 C2 C1 120.83(17) . . ?
C3 C2 H2 119.8(11) . . ?
C1 C2 H2 119.4(11) . . ?
C4 C3 C2 120.05(18) . . ?
C4 C3 H3 119.4(12) . . ?
C2 C3 H3 120.6(12) . . ?
C3 C4 C5 119.95(17) . . ?
C3 C4 H4 118.9(13) . . ?
C5 C4 H4 121.2(13) . . ?
C6 C5 C4 120.16(17) . . ?
C6 C5 H5 120.5(11) . . ?
C4 C5 H5 119.3(11) . . ?
C5 C6 C1 120.43(17) . . ?
C5 C6 H6 118.9(11) . . ?
C1 C6 H6 120.7(11) . . ?
C8 C7 C12 117.90(16) . . ?
C8 C7 P 124.50(13) . . ?
C12 C7 P 117.44(13) . . ?
C9 C8 C7 120.91(17) . . ?
C9 C8 H8 118.7(12) . . ?
C7 C8 H8 120.4(12) . . ?
C10 C9 C8 120.37(17) . . ?
C10 C9 H9 119.7(11) . . ?
C8 C9 H9 120.0(11) . . ?
C11 C10 C9 119.35(17) . . ?
C11 C10 H10 122.0(11) . . ?
C9 C10 H10 118.7(11) . . ?
C10 C11 C12 120.58(17) . . ?
C10 C11 H11 118.8(12) . . ?
C12 C11 H11 120.6(12) . . ?
C11 C12 C7 120.85(17) . . ?
C11 C12 H12 118.6(11) . . ?
C7 C12 H12 120.5(11) . . ?
 

#===END
